# Supplementary material for: Risk of death among users of Proton Pump Inhibitors: a longitudinal observational cohort study of United States veterans
Source: PubMed Central journal article supplement — BMJ Open. 2017 Jul 4;7(6):e015735. doi: 10.1136/bmjopen-2016-015735 (PMC5642790; doi:10.1136/bmjopen-2016-015735), 2017-07-04
Supplement: bmjopen-2016-015735.draft_revisions.pdf [file bmjopen-2016-015735.draft_revisions.pdf]

# BMJ Open

## Excess Risk of Death among Users of Proton Pump Inhibitors: A longitudinal observational cohort study of United States Veterans

|                                 |                                                                                                                                                                                                                                                                                                                                                                                                                                                                                                                                                                                                                                                                                                                                                                                                                    |
|---------------------------------|--------------------------------------------------------------------------------------------------------------------------------------------------------------------------------------------------------------------------------------------------------------------------------------------------------------------------------------------------------------------------------------------------------------------------------------------------------------------------------------------------------------------------------------------------------------------------------------------------------------------------------------------------------------------------------------------------------------------------------------------------------------------------------------------------------------------|
| Journal:                        | <i>BMJ Open</i>                                                                                                                                                                                                                                                                                                                                                                                                                                                                                                                                                                                                                                                                                                                                                                                                    |
| Manuscript ID                   | bmjopen-2016-015735                                                                                                                                                                                                                                                                                                                                                                                                                                                                                                                                                                                                                                                                                                                                                                                                |
| Article Type:                   | Research                                                                                                                                                                                                                                                                                                                                                                                                                                                                                                                                                                                                                                                                                                                                                                                                           |
| Date Submitted by the Author:   | 23-Dec-2016                                                                                                                                                                                                                                                                                                                                                                                                                                                                                                                                                                                                                                                                                                                                                                                                        |
| Complete List of Authors:       | Xie, Yan; VA Saint Louis Health Care System, Clinical Epidemiology Center<br>Bowe, Benjamin; VA Saint Louis Health Care System, Clinical Epidemiology Center<br>Li, Tingting; VA Saint Louis Health Care System, Clinical Epidemiology Center; Washington University in Saint Louis School of Medicine, Internal Medicine<br>Xian, Hong; VA Saint Louis Health Care System, Clinical Epidemiology Center; Saint Louis University, School of Public Health, Department of Biostatistics<br>Yan, Yan; VA Saint Louis Health Care System, Clinical Epidemiology Center; Washington University in Saint Louis School of Medicine, Public Health Sciences<br>Al-Aly, Ziyad; VA Saint Louis Health Care System, Clinical Epidemiology Center; Washington University in Saint Louis School of Medicine, Internal Medicine |
| <b>Primary Subject Heading</b>: | Public health                                                                                                                                                                                                                                                                                                                                                                                                                                                                                                                                                                                                                                                                                                                                                                                                      |
| Secondary Subject Heading:      | Epidemiology, Pharmacology and therapeutics, Public health, Gastroenterology and hepatology                                                                                                                                                                                                                                                                                                                                                                                                                                                                                                                                                                                                                                                                                                                        |
| Keywords:                       | CLINICAL PHARMACOLOGY, EPIDEMIOLOGY, Gastroduodenal disease < GASTROENTEROLOGY, Health & safety < HEALTH SERVICES ADMINISTRATION & MANAGEMENT, PUBLIC HEALTH, Adverse events < THERAPEUTICS                                                                                                                                                                                                                                                                                                                                                                                                                                                                                                                                                                                                                        |
|                                 |                                                                                                                                                                                                                                                                                                                                                                                                                                                                                                                                                                                                                                                                                                                                                                                                                    |

SCHOLARONE™  
Manuscripts

**Excess Risk of Death among Users of Proton Pump Inhibitors:  
A longitudinal observational cohort study of United States Veterans**

**Yan Xie MPH<sup>1</sup>, Benjamin Bowe MPH<sup>1</sup>, Tingting Li MD<sup>1,2</sup>, Hong Xian PhD<sup>1,3</sup>, Yan Yan MD, PhD<sup>1,4</sup>,  
and Ziyad Al-Aly MD<sup>1,2,5,6</sup>**

<sup>1</sup>Clinical Epidemiology Center, Research and Education Service, VA Saint Louis Health Care System,  
Saint Louis, Missouri

<sup>2</sup>Department of Medicine, Washington University School of Medicine, Saint Louis, Missouri

<sup>3</sup>Department of Biostatistics, College for Public Health and Social Justice, Saint Louis University,  
Saint Louis, Missouri

<sup>4</sup>Division of Public Health Sciences, Department of Surgery, Washington University School of Medicine,  
Saint Louis, Missouri

<sup>5</sup>Renal Section, Medicine Service, VA Saint Louis Health Care System,  
Saint Louis, Missouri

<sup>6</sup>Institute for Public Health, Washington University School of Medicine, Saint Louis, Missouri

**Running title: PPI and mortality**

**Word count for abstract: 283**

**Word count for text: 3705**

**Corresponding Author:**

Ziyad Al-Aly, M.D.  
Clinical Epidemiology Center  
VA Saint Louis Health Care System  
915 North Grand Boulevard, 151-JC  
Saint Louis, MO 63106  
Telephone: (314) 289-6333  
E-mail: [zalaly@gmail.com](mailto:zalaly@gmail.com)

**Abstract:**

**Objective:** Proton pump inhibitors (PPI) are widely used; and their use is associated with increased risk of adverse events. However, whether PPI use is associated with excess risk of death is unknown. We aimed to examine the association between PPI use and risk of all-cause mortality.

**Design:** Longitudinal observational cohort study

**Setting:** US Department of Veterans Affairs

**Participants:** Primary cohort of new users of PPI or Histamine H2 receptor antagonists (H2 blockers) (N=349,312); additional cohorts included PPI versus no PPI (N=3,288,092), and PPI versus no PPI and no H2 blockers (N=2,887,030).

**Main outcome measures:** Risk of death.

**Results:** Over a median follow-up of 5.71 years (IQR: 5.11-6.37), PPI use was associated with increased risk of death compared to H2 blockers use (HR=1.25; CI=1.23-1.28). Risk of death associated with PPI use was higher in analyses adjusted for high-dimensional propensity score (HR=1.16; CI=1.13-1.18); two-stage residual inclusion estimation (HR=1.21; CI=1.16-1.26); and in 1:1 time-dependent propensity score matched cohort (HR=1.34 CI=1.29-1.39). The risk of death was increased when considering PPI use versus no PPI (HR=1.15; CI=1.14-1.15), and PPI use versus no PPI and no H2 blockers (HR= 1.23; CI=1.22-1.24). Risk of death associated with PPI use was increased among participants without gastrointestinal conditions: PPI versus H2 blockers (HR=1.24; CI=1.21-1.27); PPI use versus no PPI (HR=1.19; CI=1.18-1.20); and PPI use versus no PPI and no H2 blockers (HR=1.22; CI=1.21-1.23). Among new PPI users, there was a graded association between duration of exposure and risk of death.

**Conclusions:** The results suggest excess risk of death among PPI users; risk is also increased among those without gastrointestinal conditions and with prolonged duration of use. Limiting PPI use and duration to instances where it is medically indicated may be warranted.

**Strength and limitations:**

- The results from this large national observational cohort study suggest that Proton Pump Inhibitors (PPI) use is associated with increased risk of death.
- Risk of death is increased among those with no documented medical indication for PPI use.
- A graded association was observed between duration of PPI use and risk of death in that more prolonged exposure was associated with higher risk of death.
- Exercising pharmacovigilance and limiting PPI use to instances and durations where it is medically necessary may be a meritorious approach.
- Limitations of this study include its observational nature, and that majority of cohort participants were while males.

**Introduction:**

Proton pump inhibitors (PPI) are widely prescribed and are also available for sale over the counter without prescription in several countries(1, 2). Several observational studies suggest that PPI use is associated with increased risk of a number of adverse health outcomes(1). A number of studies have shown that PPI use is associated with significant risk of acute interstitial nephritis(3-5). Recent studies established an association between exposure to PPI and risk of chronic kidney disease (CKD), kidney disease progression, and end stage renal disease (ESRD)(2, 6, 7). Results from a large prospective observational German cohort suggest that patients receiving PPI had a higher risk of incident dementia(8). Several reports highlighted a rare but potentially fatal risk of hypomagnesemia among users of PPI(9-11). PPI use has been associated with increased risk of both incident and recurrent *Clostridium difficile* infections(12). Several observational analyses have shown that PPI use was also associated with increased risk of osteoporotic fractures including hip and spine fractures(13, 14). Less convincing -and to some extent inconsistent- evidence suggests a relationship between PPI use and risks of community acquired pneumonia and cardiovascular events(15-17). Emerging - and far from conclusive- *in vitro* evidence suggests that PPI results in inhibition of lysosomal acidification and impairment of proteostasis leading to increased oxidative stress, endothelial dysfunction, telomere shortening and accelerated senescence in human endothelial cells(18). The experimental work provides a putative mechanistic link to explain some of the adverse events associated with PPI use(18).

The adverse outcomes associated with PPI use are serious and each is independently associated with higher risk of mortality. Evidence from several small cohort studies of older adults who were recently discharged from

1 the hospital, or institutionalized in long term care facilities suggests inconsistently that PPI use may be  
2 associated with increased risk of 1-year mortality(19-22). Whether PPI use is associated with excess risk of  
3 death is not known and has not been examined in large epidemiologic studies spanning a sufficiently long  
4 duration of follow up. We hypothesized that owing to the consistently observed associations between PPI use  
5 and risk of adverse health outcomes, PPI use is associated with excess risk of death, and that the risk of death  
6 would be more pronounced with increased duration of use. We therefore used the Department of Veterans  
7 Affairs national databases to build a longitudinal cohort of incident users of acid suppression therapy including  
8 PPI and Histamine H2 receptor antagonists (H2 blockers) to examine the association between PPI use and risk  
9 of all-cause mortality, and to determine whether risk of death is increased with prolonged duration of use.  
10  
11  
12  
13  
14  
15  
16  
17  
18  
19  
20

## 21 **Methods:**

### 22 **Cohort participants:**

#### 23 **Primary cohort:**

24 Using administrative data from the United States Department of Veterans Affairs (VA), we identified patients  
25 who received an outpatient H2 blockers or PPI prescription between October 01, 2006 and September 30,  
26 2008 (n=1,762,908). In order to select new users of acid suppression therapy (incident user design), we  
27 excluded 1,356,948 patients who received any outpatient H2 blockers or PPI prescriptions between October 01,  
28 1998 and September 30, 2006. To account for patients' kidney function, only patients with at least one  
29 outpatient serum creatinine value before first acid suppression therapy prescription were selected in the cohort,  
30 yielding an analytic cohort of 349,312 patients. Patients whose first acid suppression therapy was PPI  
31 (n=275,977) were considered to be in the PPI group during follow-up. Patients who received H2 blockers as  
32 their first acid suppression therapy (n=73,335) served as the reference group before they received any PPI  
33 prescription. Within the reference group, those who received a PPI prescription later (n=33,136) were  
34 considered to be in the PPI group from the date of their first PPI prescription until the end of follow-up(23).  
35  
36  
37  
38  
39  
40  
41  
42  
43  
44  
45  
46  
47  
48  
49  
50  
51  
52  
53  
54  
55  
56  
57  
58  
59  
60

#### 61 **Secondary cohorts:**

1 We additionally built two secondary cohorts to examine the association of PPI use and risk of death in a) PPI  
2 versus no PPI users, and b) PPI versus non users of acid suppression therapy. Patients with no PPI  
3 prescription between October 01, 1998 and September 30, 2006, and with at least one outpatient eGFR value  
4 before October 01, 2006 were selected to evaluate the risk of death associated with PPI use versus no PPI  
5 use (n=3,288,092). Patients with no PPI prescription between October 01, 1998 and September 30, 2006, with  
6 no H2 blockers before first PPI prescription and at least one outpatient eGFR value before October 01, 2006  
7 were selected to evaluate the risk of death associated with PPI use versus no acid suppression therapy  
8 (n=2,887,030). T0 for secondary cohorts was defined as October 01, 2006.

9 Patients in both primary and secondary cohorts were followed until September 30, 2013 or death. The study  
10 was approved by the Institutional Review Board of the VA Saint Louis Health Care System, Saint Louis, MO.

#### 21 **Data Sources:**

22 We used the Department of Veterans Affairs databases including inpatient and outpatient medical SAS  
23 datasets (that include utilization data related to all inpatient and outpatient encounters within the VA system) to  
24 ascertain detailed patient demographic characteristics and comorbidity information based on inpatient and  
25 outpatient encounters(2). The VA Managerial Cost Accounting System Laboratory Results (a comprehensive  
26 database that includes VA-wide results for selected laboratory tests obtained in the clinical setting) provided  
27 information on outpatient and inpatient laboratory results. The VA Corporate Data Warehouse Production  
28 Outpatient Pharmacy domain provided information on outpatient prescriptions. The VA Vital Status and  
29 Beneficiary Identification Records Locator Subsystem (BIRLS) files provided demographic characteristics and  
30 death.

31 **Primary Predictor Variable:** PPI use was the primary predictor. Once cohort participants received PPI  
32 prescription, they were considered with effect of PPI until the end of follow up. Medications that contain  
33 esomeprazole, lansoprazole, omeprazole, pantoprazole or rabeprazole were counted as PPI. Medications  
34 including ranitidine, cimetidine, and famotidine were counted as H2 blockers.

1 **Outcome:** The primary outcome in survival analyses was time to death. Death information is routinely  
2 collected by the Veterans Benefit Administration for all United States Veterans.  
3  
4

5  
6 **Covariates:**  
7

8 Covariates included age, race, gender, eGFR, number of outpatient serum creatinine measurements, number  
9 of hospitalizations, diabetes mellitus, hypertension, cardiovascular disease, peripheral artery disease,  
10 cerebrovascular disease, chronic lung disease, cancer, hepatitis C, HIV, dementia and diseases associated  
11 with acid suppression therapy use such as gastroesophageal reflux disease (GERD), upper gastrointestinal (GI)  
12 tract bleeding, ulcer disease, H. Pylori infection, Barrett's esophagus, achalasia, stricture and esophageal  
13 adenocarcinoma(24-27). eGFR was calculated using the abbreviated four-variable Chronic Kidney Disease  
14 Epidemiology Collaboration equation based on age, sex, race, and outpatient serum creatinine(28).  
15 Race/ethnicity was categorized as white, black, or other (Latino, Asian, Native American, or other racial/ethnic  
16 minority groups). Comorbidities except for hepatitis C and HIV were assigned on the basis of relevant ICD-9-  
17 CM diagnostic and procedures codes and CPT codes in the VA Medical SAS datasets(2, 29-32). Hepatitis C  
18 and HIV were assigned based on laboratory results.  
19  
20  
21  
22  
23  
24  
25  
26  
27  
28  
29  
30  
31  
32  
33  
34

35 Baseline covariates were ascertained from October 01, 1998 till T0. All covariates except for age, race and  
36 gender covariates values were treated as time-varying covariates where they were additionally assessed until  
37 date of first PPI prescription in those patients who did not have PPI prescription at T0. Any comorbidity  
38 occurring during the assessment period was considered present during the remaining follow-up. eGFR was the  
39 outpatient eGFR value within and most proximate to the end of the assessment period. Number of outpatient  
40 serum creatinine measurements and number of hospitalizations were accumulated during the assessment  
41 period.  
42  
43  
44  
45  
46  
47  
48  
49  
50  
51

52 **Statistical Analysis:**  
53

54 Means, standard deviations and t-tests are presented for normally distributed continuous variables; medians,  
55 interquartile ranges and Wilcoxon-Mann-Whitney tests are presented for non-normally distributed continuous  
56 variables; counts, percentages and Chi-square tests are presented for categorical variables. Incident rates per  
57  
58  
59  
60



1 100 person-years were computed for death and confidence intervals were estimated based on the normal  
2 distribution. Simon and Makuch method for survival curves was used for time-dependent covariates(33).  
3  
4  
5

6 Cox regression models with time-dependent covariates were used in the assessment of the association  
7 between PPI exposure and risk of death where patients could switch from H2 blockers to PPI in the models. In  
8 order to account for potential delayed effect of PPI, patients were considered to have the effect of PPI from the  
9 first PPI prescription till end of follow up. In addition, time dependent Cox models were conducted in subgroups  
10 where patients had no GI conditions, and where patients had no GI conditions except for GERD.  
11  
12  
13  
14  
15  
16  
17  
18  
19

20 Because exposure in this observational cohort is time-dependent, we undertook 1:1 propensity score matching  
21 for the primary cohort where time-dependent propensity scores were calculated based on time-dependent Cox  
22 regression with all covariates(34)(details are provided in supplemental methods).  
23  
24  
25  
26  
27

28 In order to optimize control of confounding, we additionally built high-dimensional propensity score adjusted  
29 survival models following the multistep algorithm described by Schneeweiss et al(35)(details are provided in  
30 supplemental methods). We also applied two-stage residual inclusion estimation based on instrumental  
31 variable approach (Supplemental methods)(36).  
32  
33  
34  
35  
36  
37  
38

39 In addition, we evaluated the association between duration of PPI prescription and risk of death among new  
40 users of PPI. Duration was defined in cumulative days of use and categorized as  $\leq 30$ , 31-90, 91-180, 181-360,  
41 361-720, where  $\leq 30$  days considered as the reference group. To avoid immortal time bias (by definition, cohort  
42 participants must be alive to receive prescription hence introducing a bias commonly referred to as immortal  
43 time bias), time of cohort entry was defined as the date of last PPI prescription plus days' supply (37, 38). In  
44 order to ensure sufficient length of follow up time following T0, we excluded cohort participants with cumulative  
45 duration of exposure exceeding 720 days (because of limited overall cohort timeline, and because T0 starts at  
46 the end of last prescription, those with long exposure will necessarily have limited follow up time). In  
47 regression analyses, a 95% confidence interval (CI) of a hazard ratio (HR) that does not include unity was  
48 considered statistically significant. All analyses were performed using SAS Enterprise Guide version 7.1.  
49  
50  
51  
52  
53  
54  
55  
56  
57  
58  
59  
60



### Sensitivity Analysis:

1  
2 In order to further evaluate the consistency and robustness of study findings, we examined the observed  
3  
4 associations in a less contemporary cohort (dating back to an era where PPI prescription and use were far less  
5  
6 frequent) of patients without acid suppression therapy prescriptions between October 01, 1998 and September  
7  
8 30, 2000 (washout period) and with acid suppression therapy prescription between October 01, 2000 and  
9  
10 September 30, 2002 and at least one outpatient serum creatinine value before that. Patients in this cohort were  
11  
12 followed till September 30, 2007 or death. To examine the impact of potential residual confounding on study  
13  
14 results, we conducted additional sensitivity analyses as described by Schneeweiss(39): a) we used the rule-out  
15  
16 approach to identify the strength of the residual confounding that could fully explain the association observed in  
17  
18 primary analyses; and b) applied an external adjustment approach using external information (prevalence and  
19  
20 risk estimates from published literature) to evaluate potential net confounding bias due to unmeasured  
21  
22 confounders(2, 39-42). Methods are described elegantly by Schneeweiss(39).  
23  
24  
25  
26  
27

28 We conducted additional sensitivity analyses which included hemoglobin as a covariate in cohort participants  
29  
30 with available data. We also undertook analyses in those with and without cardiovascular disease. Finally, and  
31  
32 in order to ascertain the specificity of the findings, we examined the association between PPI exposure and the  
33  
34 risk of a motor vehicle accident as a tracer outcome where a priori knowledge suggests an association is not  
35  
36 likely to exist.  
37  
38  
39  
40

### Patient involvement:

41  
42 No patients were involved in developing the hypothesis, the specific aims, or the research questions, nor were  
43  
44 they involved in developing plans for design or implementation of the study. No patients were involved in the  
45  
46 interpretation of study results, or write up of the manuscript. There are no plans to disseminate the results of  
47  
48 the research to study participants or the relevant patient community.  
49  
50  
51  
52

### Results:

53  
54  
55 The demographic and health characteristics of the overall primary cohort of new users of acid suppression  
56  
57 therapy (n=349,312), by type of acid suppressant drug at time of cohort entry (H2 blockers n=73,335; PPI  
58  
59  
60

n=275,977), and those who were ever exposed to PPI (n=309,113) are provided in table 1. There were significant baseline differences in that cohort participants who were treated with PPI were older, and were more likely to have comorbid conditions including diabetes, hypertension, cardiovascular disease, and hyperlipidemia. Cohort participants treated with PPI were also more likely to have upper gastrointestinal tract bleeding, ulcer disease, H. Pylori infection, Barrett's esophagus, achalasia, stricture and esophageal adenocarcinoma (table 1). Survival curves for PPI and H2 blockers were presented in figure 1.

#### **Association between PPI use and risk of death:**

Among new users of acid suppression therapy (N=349,312), and over a median follow up of 5.71 years (IQR: 5.11 – 6.37), where exposure was treated as time-dependent covariate; PPI use was associated with increased risk of death compared to H2 blockers use (HR=1.25; CI=1.23-1.28) (table 2). Among new users of acid suppression therapy (N=349,312); in high-dimensional propensity score adjusted models, new PPI users had increased risk of death compared to new users of H2 blockers (HR=1.16; CI=1.13-1.18); based on two-stage residual inclusion estimation, risk of death was higher in new users PPI when compared to new users of H2 blockers (HR=1.21; CI=1.16-1.26). In a 1:1 time-dependent propensity score matched cohort of new users of PPI and H2 blockers (N=146,670), PPI users had significantly increased risk of death (HR=1.34; CI=1.29-1.39).

We examined the relationship of PPI and risk of death in secondary cohorts (as described in methods) where we considered risk associated with PPI use versus no known exposure to PPI (no PPI use +/- H2 blockers use) (N=3,288,092); the results suggest that PPI use was associated with increased risk of death (HR=1.15; CI=1.14-1.15) (table 2). Assessment of risk of death associated with PPI use versus no known exposure to any acid suppression therapy (no PPI use and no H2 blockers use) (N=2,887,070), suggests increased risk of death with PPI use (HR= 1.23; CI=1.22-1.24).

#### **Association between PPI use and risk of death in those without gastrointestinal conditions:**

We then analyzed the association between PPI use and the risk of death in cohort where we excluded participants with documented medical conditions generally considered as indications for treatment with PPI

1 including GERD, upper gastrointestinal tract bleeding, ulcer disease, H. Pylori infection, Barrett's esophagus,  
2 achalasia, stricture and esophageal adenocarcinoma. The intent of this analysis was to examine the putative  
3 association of PPI use and risk of death in a lower risk cohort. Examination of risk of death associated with use  
4 of acid suppression therapy (PPI vs. H2 blockers) suggests that risk of death was increased with PPI use  
5 (HR=1.24; CI=1.21-1.27) (table 2). Examination of the risk of death associated with PPI use versus no known  
6 exposure to PPI (no PPI use +/- H2 blockers use) suggests a higher risk of death associated with PPI use  
7 (HR=1.19; CI=1.18, 1.20). Results were consistent where we examined risk of death associated with PPI use  
8 versus no known exposure to any acid suppression therapy (no PPI use and no H2 blockers use) (HR=1.22;  
9 CI=1.21-1.23). Risk of death associated with PPI use in cohort participants without GI conditions but included  
10 participants with GERD yielded consistent results (PPI vs H2 blockers (HR=1.24; CI=1.21-1.27); PPI vs no PPI  
11 (HR=1.14; CI=1.13-1.14); PPI vs no PPI and no H2 blockers (HR=1.22; CI=1.21-1.22) (table 2).  
12  
13  
14  
15  
16  
17  
18  
19  
20  
21  
22  
23  
24  
25

#### 26 **Duration of exposure and excess risk of death:**

27 We examined the association between duration of PPI exposure and risk of death among new users of PPI  
28 (n=166,098). Compared to those exposed for  $\leq 30$  days, there was a graded association between duration of  
29 exposure and risk of death among those exposed for 31-90, 91-180, 181-360, and 361-720 days (table 3,  
30 figure 2).  
31  
32  
33  
34  
35  
36  
37  
38  
39

#### 40 **Sensitivity analyses:**

41 We tested the robustness of study results in sensitivity analyses where we built a less contemporary cohort as  
42 described in methods; demographic and health characteristics of this cohort are provided in supplemental table  
43 1. Where exposure was treated as time-dependent, PPI use was associated with increased risk of death  
44 compared to H2 blockers use (HR=1.17; CI=1.15-1.19). In a 1:1 time-dependent propensity score matched  
45 cohort of PPI and H2 blockers, PPI users had significantly increased risk of death HR=1.21 (1.19-1.24).  
46  
47  
48  
49  
50  
51  
52 Furthermore, we also observed a graded association between cumulative duration of exposure to PPI and risk  
53 of death (supplemental table 2, supplemental figure 1).  
54  
55  
56  
57  
58  
59  
60

1 To examine the potential impact of residual confounding on study results, we used rule-out and external  
2 adjustment approaches as described by Schneeweiss(39). Using the rule-out approach, we characterized a set  
3 of parameters (OR for relationship of PPI and confounder), and (HR for relationship of confounder and death)  
4 of parameters (OR for relationship of PPI and confounder), and (HR for relationship of confounder and death)  
5 with sufficient strength to fully explain the association observed in primary analyses (supplemental figure 2).  
6 For example, if the confounder was twice as likely among PPI users (OR=2), and the HR of death associated  
7 with the uncontrolled confounder exceeded 4.0, then the uncontrolled confounder would fully explain the  
8 observed association between PPI and death (supplemental figure 2). Given that our analyses accounted for  
9 most known strong independent risk factors of death, and employed an active comparator group; to cancel the  
10 results, any uncontrolled confounder of the required prevalence (OR=2 or more in the example above), and  
11 strength (HR=4 or more in the example above) would also have to be independent of the confounders already  
12 adjusted for and is unlikely to exist; thus the results cannot be fully explained by this putative uncontrolled  
13 confounder.  
14  
15  
16  
17  
18  
19  
20  
21  
22  
23  
24  
25  
26  
27

28 External adjustment to estimate the impact of 3 unmeasured confounders including obesity, smoking, and use  
29 of therapeutics including anticoagulants, antiplatelet agents, and non-steroidal anti-inflammatory drugs shows  
30 a net confounding bias of 9.66% (supplemental figure 2). The total bias could move a null association between  
31 PPI and death from HR=1.00 to HR=1.10 (reflecting the net positive bias of 9.66% rounded up to 10.0%). The  
32 association we observed between PPI and death was 1.25>1.10, which cannot be fully due to bias of  
33 unmeasured confounding.  
34  
35  
36  
37  
38  
39  
40  
41  
42  
43

44 The association between PPI and death remained significant after additionally controlling for hemoglobin levels  
45 (HR=1.25; CI=1.23, 1.28). Risk was also increased in those with and without cardiovascular disease (HR=1.19;  
46 CI=1.15, 1.23, and HR=1.30; CI=1.27, 1.34; respectively). As a test of specificity, among users of acid  
47 suppression therapy, PPI use was not associated with increased risk of the tracer outcome of a motor vehicle  
48 accident (HR=0.99; CI= 0.89, 1.10).  
49  
50  
51  
52  
53  
54  
55

## 56 Discussion:

57  
58  
59  
60

1 This study provides insights into the excess risk of death associated with PPI use. In a large primary cohort of  
2 new users of acid suppression therapy followed for a median of 5.71 years, we show a significant association  
3 between PPI use and risk of all-cause mortality, risk was increased among those with no documented medical  
4 indications for PPI use, and with prolonged duration of use. The results were consistent in multiple analyses  
5 and robust to changes in epidemiologic design and statistical specifications, and were reproduced in an earlier  
6 and less contemporary cohort from an era where PPI use was far less frequent (43).  
7  
8  
9  
10  
11  
12

13  
14  
15 PPI are widely used by millions of people for indications and durations that were never tested or approved;  
16 they are available over the counter (without prescription) in several countries, and generally perceived as safe  
17 class of therapeutics; they are often overprescribed, rarely deprescribed, frequently started inappropriately  
18 during a hospital stay, and their use extended for long term duration without appropriate medical indication (44-  
19 48). Results of nationally representative data from the National Health and Nutrition Examination Survey,  
20 where analyses were weighted to represent the US adult population, showed that the use of prescription PPI  
21 increased from 3.9% to 7.8% from 1999-2000 to 2011-2012, representing a doubling of prevalence ratio(43).  
22  
23  
24 Studies estimate that between 53% and 69% of PPI prescriptions are for inappropriate indications(44, 49)  
25 where benefits of PPI use may not justify the risks for many users(49-51). The findings in our study highlight a  
26 potential excess risk of death among users of PPI, and in particular among cohort participants without GI  
27 comorbidities, and that risk is increased with prolonged duration of PPI exposure. While our results should not  
28 deter prescription and use of PPI where medically indicated, they may be used to encourage and promote  
29 pharmacovigilance and emphasize the need to exercise judicious use of PPI and limit use and duration of  
30 therapy to instances where there is a clear medical indication and where benefit outweighs potential risk(1).  
31  
32  
33 Standardized guidelines for initiating PPI prescription may lead to reduced overuse(52), regular review of  
34 prescription and over the counter medications, and deprescription where a medical indication for PPI treatment  
35 ceases to exist may be a meritorious approach(50).  
36  
37  
38  
39  
40  
41  
42  
43  
44  
45  
46  
47  
48  
49  
50  
51  
52  
53

54 The biologic mechanism underpinning the association of PPI use and risk of death is not clear. Experimental  
55 evidence in rats suggests that PPI administration limits the regenerative capacity of livers following partial  
56 hepatectomy(53). Administration of PPI upregulates expression of mRNA, protein level, and results in  
57  
58  
59  
60

1 increased activity of the heme oxygenase-1 enzyme in gastric and endothelial cells(54). Heme oxygenase-1 is  
2 generally seen as salutary, but its beneficial properties are vitiated at higher doses, and with sustained duration  
3 of expression(55). PPI treatment impairs lysosomal acidification and proteostasis and results in increased  
4 oxidative stress, dysfunction, telomere shortening and accelerated senescence of human endothelial cells(18,  
5 56). Wu and collaborators undertook a systematic toxicity mechanism analysis using a high-throughput in-silico  
6 analysis of microarray data; they reported that PPI up-regulated genes in the cellular retinol metabolism  
7 pathway, and down-regulated genes in the complement and coagulation cascades pathway and that PPI may  
8 block pathways of antigen presentation, and abrogate the synthesis and secretion of cytokines and  
9 complement component proteins and coagulation factors(56, 57). How the changes in gene expression  
10 contribute to excess risk of death is not yet entirely clear. The plausible clinical course leading to heightened  
11 risk of death is likely mediated by the occurrence of one or more of the adverse events associated with PPI use  
12 (kidney disease, dementia, hypomagnesemia, Clostridium difficile infection, osteoporotic fracture, etc...).

13  
14  
15  
16  
17  
18  
19  
20  
21  
22  
23  
24  
25  
26  
27  
28  
29  
30  
31  
32  
33  
34  
35  
36  
37  
38  
39  
40  
41  
42  
43  
44  
45  
46  
47  
48  
49  
50  
51  
52  
53  
54  
55  
56  
57  
58  
59  
60

Further studies are needed to characterize the biologic mechanisms that might explain the epidemiologic findings in this report.

The constellation of findings in this report must be interpreted with the full cognizance of the observational study design where confounding by indication, and selection bias may represent limitations; we employed an analytic strategy to evaluate the risk of death among users of acid suppression therapy (PPI and H2 blockers); a class of therapeutics generally prescribed for similar indications, a strategy which may lessen but does not completely eliminate the possibility of confounding by indication bias. We additionally built time-dependent propensity score matched cohort, high dimensional propensity score adjusted models, and employed the use of instrumental variable to reduce potential confounding bias. Although we accounted for known covariates in our analyses, it is possible that there are residual confounders (either unmeasured, or unknown) that may still confound the association of PPI and risk of death. However, we evaluated the impact of residual confounding in quantitative bias analyses, and the results suggest that even with the application of unlikely (and exaggerated) set of assumptions, the risk cannot be fully explained by residual confounding. In our analyses, we defined drug exposure as having a prescription for it; since PPI (and H2 blockers) are available over the counter in the United States, it is possible that some patients in this cohort may have obtained and used PPI

1 without prescription. However, owing to financial considerations, this is not highly likely, and if it occurred in  
2 some patients, it will have biased the results against the primary hypothesis and resulted in underestimation of  
3 risk. The cohort included mostly older white male US Veterans which may limit the generalizability of study  
4 results to a broader population. Our datasets did not include information on the cause of death. The study has  
5 a number of strengths including the use of national large scale data from a network of integrated health  
6 systems which was captured during routine medical care which minimizes selection bias. We employed a new  
7 user (incident user) approach, and evaluated the association between PPI use and risk of death using a  
8 number of analytical approaches where we consistently found a significant association between PPI use and  
9 increased risk of death. The consistency of study findings in our report, and the growing body of evidence in  
10 the literature showing a host of adverse events associated with PPI use are compelling, and because of the  
11 high prevalence of PPI use, may have public health implications. Exercising pharmacovigilance and limiting  
12 PPI use to instances and durations to instances where it is medically indicated may be warranted.  
13  
14  
15  
16  
17  
18  
19  
20  
21  
22  
23  
24  
25  
26  
27  
28  
29  
30  
31  
32  
33  
34  
35  
36  
37  
38  
39  
40  
41  
42  
43  
44  
45  
46  
47  
48  
49  
50  
51  
52  
53  
54  
55  
56  
57  
58  
59  
60



**Footnotes**

**Contributors:** Research area and study design: YX, BB, TL, HX, YY, ZAA; data acquisition: YX, BB; data analysis and interpretation: YX, BB, TL, HX, YY, ZAA; statistical analysis: YX, BB; supervision and mentorship: ZAA. Each author contributed important intellectual content during manuscript drafting or revision and accepts accountability for the overall work by ensuring that questions pertaining to the accuracy or integrity of any portion of the work are appropriately investigated and resolved. ZAA takes responsibility that this study has been reported honestly, accurately, and transparently; that no important aspects of the study have been omitted, and that any discrepancies from the study as planned have been explained.

**Funding:** This research was funded by the United States Department of Veterans Affairs (for ZAA). The funders of this study had no role in study design; collection, analysis, and interpretation of data; writing the report; and the decision to submit the report for publication.

**Competing interests:** All authors have completed the ICMJE uniform disclosure form at [www.icmje.org/coi\\_disclosure.pdf](http://www.icmje.org/coi_disclosure.pdf) and declare: no support from any organisation for the submitted work; no financial relationships with any organisations that might have an interest in the submitted work in the previous three years; no other relationships or activities that could appear to have influenced the submitted work.

**Ethical approval:** This research project was reviewed and approved by the Institutional Review Board of the VA Saint Louis Health Care System.

**Data sharing:** Data is available through the United States Department of Veterans Affairs.

**Transparency:** The lead authors affirm that the manuscript is an honest, accurate, and transparent account of the study being reported; that no important aspects of the study have been omitted; and that any discrepancies from the study as planned have been explained.

**Disclaimer:** The contents do not represent the views of the U.S. Department of Veterans Affairs or the United States Government.

**Disclosures:** None.

## References:

1. Schoenfeld AJ, Grady D. Adverse Effects Associated With Proton Pump Inhibitors. *JAMA internal medicine*. 2016;176(2):172-4.
2. Xie Y, Bowe B, Li T, Xian H, Balasubramanian S, Al-Aly Z. Proton Pump Inhibitors and Risk of Incident CKD and Progression to ESRD. *Journal of the American Society of Nephrology : JASN*. 2016.
3. Antoniou T, Macdonald EM, Hollands S, Gomes T, Mamdani MM, Garg AX, et al. Proton pump inhibitors and the risk of acute kidney injury in older patients: a population-based cohort study. *CMAJ open*. 2015;3(2):E166-71.
4. Klepser DG, Collier DS, Cochran GL. Proton pump inhibitors and acute kidney injury: a nested case-control study. *BMC nephrology*. 2013;14:150.
5. Blank ML, Parkin L, Paul C, Herbison P. A nationwide nested case-control study indicates an increased risk of acute interstitial nephritis with proton pump inhibitor use. *Kidney international*. 2014;86(4):837-44.
6. Lazarus B, Chen Y, Wilson FP, Sang Y, Chang AR, Coresh J, et al. Proton Pump Inhibitor Use and the Risk of Chronic Kidney Disease. *JAMA internal medicine*. 2016;176(2):238-46.
7. Xie Y, Bowe B, Li T, Xian H, Yan Y, Al-Aly Z. Long Term Kidney Outcomes among Proton Pump Inhibitors Users without Intervening Acute Kidney Injury. *Kidney international*. 2016.
8. Gomm W, von Holt K, Thome F, Broich K, Maier W, Fink A, et al. Association of Proton Pump Inhibitors With Risk of Dementia: A Pharmacoepidemiological Claims Data Analysis. *JAMA neurology*. 2016;73(4):410-6.
9. Danziger J, William JH, Scott DJ, Lee J, Lehman LW, Mark RG, et al. Proton-pump inhibitor use is associated with low serum magnesium concentrations. *Kidney international*. 2013;83(4):692-9.
10. Kieboom BC, Kieffe-de Jong JC, Eijgelsheim M, Franco OH, Kuipers EJ, Hofman A, et al. Proton Pump Inhibitors and Hypomagnesemia in the General Population: A Population-Based Cohort Study. *American journal of kidney diseases : the official journal of the National Kidney Foundation*. 2015;66(5):775-82.
11. Broeren MA, Geerdink EA, Vader HL, van den Wall Bake AW. Hypomagnesemia induced by several proton-pump inhibitors. *Annals of internal medicine*. 2009;151(10):755-6.
12. Kwok CS, Arthur AK, Anibueze CI, Singh S, Cavallazzi R, Loke YK. Risk of Clostridium difficile infection with acid suppressing drugs and antibiotics: meta-analysis. *The American journal of gastroenterology*. 2012;107(7):1011-9.
13. Zhou B, Huang Y, Li H, Sun W, Liu J. Proton-pump inhibitors and risk of fractures: an update meta-analysis. *Osteoporosis international : a journal established as result of cooperation between the European Foundation for Osteoporosis and the National Osteoporosis Foundation of the USA*. 2015.
14. Yu EW, Bauer SR, Bain PA, Bauer DC. Proton pump inhibitors and risk of fractures: a meta-analysis of 11 international studies. *The American journal of medicine*. 2011;124(6):519-26.
15. Melloni C, Washam JB, Jones WS, Halim SA, Hasselblad V, Mayer SB, et al. Conflicting results between randomized trials and observational studies on the impact of proton pump inhibitors on cardiovascular events when coadministered with dual antiplatelet therapy: systematic review. *Circulation Cardiovascular quality and outcomes*. 2015;8(1):47-55.
16. Fillion KB, Chateau D, Targownik LE, Gershon A, Durand M, Tamim H, et al. Proton pump inhibitors and the risk of hospitalisation for community-acquired pneumonia: replicated cohort studies with meta-analysis. *Gut*. 2014;63(4):552-8.
17. Eom CS, Jeon CY, Lim JW, Cho EG, Park SM, Lee KS. Use of acid-suppressive drugs and risk of pneumonia: a systematic review and meta-analysis. *CMAJ : Canadian Medical Association journal = journal de l'Association medicale canadienne*. 2011;183(3):310-9.
18. Yepuri G, Sukhovshin R, Nazari-Shafti TZ, Petrascheck M, Ghebre YT, Cooke JP. Proton Pump Inhibitors Accelerate Endothelial Senescence. *Circulation research*. 2016.
19. Bell JS, Strandberg TE, Teramura-Gronblad M, Laurila JV, Tilvis RS, Pitkala KH. Use of proton pump inhibitors and mortality among institutionalized older people. *Archives of internal medicine*. 2010;170(17):1604-5.
20. Maggio M, Corsonello A, Ceda GP, Cattabiani C, Lauretani F, Butto V, et al. Proton pump inhibitors and risk of 1-year mortality and rehospitalization in older patients discharged from acute care hospitals. *JAMA internal medicine*. 2013;173(7):518-23.
21. Teramura-Gronblad M, Bell JS, Poysti MM, Strandberg TE, Laurila JV, Tilvis RS, et al. Risk of death associated with use of PPIs in three cohorts of institutionalized older people in Finland. *Journal of the American Medical Directors Association*. 2012;13(5):488 e9-13.

22. Wilson N, Gnjidic D, March L, Sambrook P, Hilmer SN. Use of PPIs are not associated with mortality in institutionalized older people. *Archives of internal medicine*. 2011;171(9):866; author reply -7.
23. Hu JCaM. Covariance Analysis of Heart Transplant Survival Data. *Journal of the American Statistical Association*. 1977;Vol. 72(No. 357 (Mar, 1977)):27-36
24. Gawron AJ, Pandolfino JE, Miskevics S, Lavela SL. Proton pump inhibitor prescriptions and subsequent use in US veterans diagnosed with gastroesophageal reflux disease. *Journal of general internal medicine*. 2013;28(7):930-7.
25. Bowe B, Xie Y, Xian H, Balasubramanian S, Al-Aly Z. Low levels of high-density lipoprotein cholesterol increase the risk of incident kidney disease and its progression. *Kidney international*. 2016;89(4):886-96.
26. Bowe B, Xie Y, Xian H, Balasubramanian S, M AZ, Al-Aly Z. High Density Lipoprotein Cholesterol and the Risk of All-Cause Mortality among U.S. Veterans. *Clinical journal of the American Society of Nephrology : CJASN*. 2016.
27. Bowe B XY, Xian H, Lian M, Al-Aly Z. Geographic Variation and US County Characteristics Associated with Rapid Kidney Function Decline. *Kidney International Reports*. 2016.
28. Levey AS, Stevens LA, Schmid CH, Zhang YL, Castro AF, 3rd, Feldman HI, et al. A new equation to estimate glomerular filtration rate. *Annals of internal medicine*. 2009;150(9):604-12.
29. Xie Y, Bowe B, Xian H, Balasubramanian S, Al-Aly Z. Estimated GFR Trajectories of People Entering CKD Stage 4 and Subsequent Kidney Disease Outcomes and Mortality. *American journal of kidney diseases : the official journal of the National Kidney Foundation*. 2016.
30. Xie Y, Bowe B, Xian H, Balasubramanian S, Al-Aly Z. Rate of Kidney Function Decline and Risk of Hospitalizations in Stage 3A CKD. *Clinical journal of the American Society of Nephrology : CJASN*. 2015;10(11):1946-55.
31. Xie Y, Bowe B, Xian H, Balasubramanian S, Al-Aly Z. Estimated GFR Trajectories of People Entering CKD Stage 4 and Subsequent Kidney Disease Outcomes and Mortality. *American journal of kidney diseases : the official journal of the National Kidney Foundation*. 2016;68(2):219-28.
32. Xie Y, Bowe B, Xian H, Balasubramanian S, Al-Aly Z. Renal Function Trajectories in Patients with Prior Improved eGFR Slopes and Risk of Death. *PloS one*. 2016;11(2):e0149283.
33. Schultz LR, Peterson EL, Breslau N. Graphing survival curve estimates for time-dependent covariates. *Int J Methods Psychiatr Res*. 2002;11(2):68-74.
34. Lu B. Propensity score matching with time-dependent covariates. *Biometrics*. 2005;61(3):721-8.
35. Schneeweiss S, Rassen JA, Glynn RJ, Avorn J, Mogun H, Brookhart MA. High-dimensional propensity score adjustment in studies of treatment effects using health care claims data. *Epidemiology*. 2009;20(4):512-22.
36. Terza JV, Basu A, Rathouz PJ. Two-stage residual inclusion estimation: addressing endogeneity in health econometric modeling. *J Health Econ*. 2008;27(3):531-43.
37. I Adams AL, Black MH, Zhang JL, Shi JM, Jacobsen SJ. Proton-pump inhibitor use and hip fractures in men: a population-based case-control study. *Annals of epidemiology*. 2014;24(4):286-90.
38. Suissa S. Immortal time bias in observational studies of drug effects. *Pharmacoepidemiology and drug safety*. 2007;16(3):241-9.
39. Schneeweiss S. Sensitivity analysis and external adjustment for unmeasured confounders in epidemiologic database studies of therapeutics. *Pharmacoepidemiology and drug safety*. 2006;15(5):291-303.
40. Collaborators GBDRF. Global, regional, and national comparative risk assessment of 79 behavioural, environmental and occupational, and metabolic risks or clusters of risks, 1990-2015: a systematic analysis for the Global Burden of Disease Study 2015. *Lancet*. 2016;388(10053):1659-724.
41. Mortality GBD, Causes of Death C. Global, regional, and national life expectancy, all-cause mortality, and cause-specific mortality for 249 causes of death, 1980-2015: a systematic analysis for the Global Burden of Disease Study 2015. *Lancet*. 2016;388(10053):1459-544.
42. Hvid-Jensen F NR, Pedersen L, Funch-Jensen P, Drewes AM, Larsen FB, Thomsen RW Lifestyle factors among proton pump inhibitor users and nonusers: a cross-sectional study in a population-based setting. *Dovepress*. 4 December 2013 Volume 2013:5(1) Pages 493—499.
43. Kantor ED, Rehm CD, Haas JS, Chan AT, Giovannucci EL. Trends in Prescription Drug Use Among Adults in the United States From 1999-2012. *Jama*. 2015;314(17):1818-31.
44. Forgacs I, Loganayagam A. Overprescribing proton pump inhibitors. *Bmj*. 2008;336(7634):2-3.

- 1  
2  
3  
4  
5  
6  
7  
8  
9  
10  
11  
12  
13  
14  
15  
16  
17  
18  
19  
20  
21  
22  
23  
24  
25  
26  
27  
28  
29  
30  
31  
32  
33  
34  
35  
36  
37  
38  
39  
40  
41  
42  
43  
44  
45  
46  
47  
48  
49  
50  
51  
52  
53  
54  
55  
56  
57  
58  
59  
60
45. Choudhry MN, Soran H, Ziglam HM. Overuse and inappropriate prescribing of proton pump inhibitors in patients with Clostridium difficile-associated disease. QJM : monthly journal of the Association of Physicians. 2008;101(6):445-8.
46. Zink DA, Pohlman M, Barnes M, Cannon ME. Long-term use of acid suppression started inappropriately during hospitalization. Alimentary pharmacology & therapeutics. 2005;21(10):1203-9.
47. Strid H, Simren M, Bjornsson ES. Overuse of acid suppressant drugs in patients with chronic renal failure. Nephrology, dialysis, transplantation : official publication of the European Dialysis and Transplant Association - European Renal Association. 2003;18(3):570-5.
48. Qato DM, Alexander GC, Conti RM, Johnson M, Schumm P, Lindau ST. Use of prescription and over-the-counter medications and dietary supplements among older adults in the United States. Jama. 2008;300(24):2867-78.
49. Katz MH. Failing the acid test: benefits of proton pump inhibitors may not justify the risks for many users. Archives of internal medicine. 2010;170(9):747-8.
50. Linsky A, Simon SR. Reversing gears: discontinuing medication therapy to prevent adverse events. JAMA internal medicine. 2013;173(7):524-5.
51. Grady D, Redberg RF. Less is more: how less health care can result in better health. Archives of internal medicine. 2010;170(9):749-50.
52. Yachimski PS, Farrell EA, Hunt DP, Reid AE. Proton pump inhibitors for prophylaxis of nosocomial upper gastrointestinal tract bleeding: effect of standardized guidelines on prescribing practice. Archives of internal medicine. 2010;170(9):779-83.
53. Kucuk HF, Akyol H, Kaptanoglu L, Kurt N, Barisik NO, Bingul S, et al. Effect of proton pump inhibitors on hepatic regeneration. Eur Surg Res. 2006;38(3):322-8.
54. Becker JC, Grosser N, Waltke C, Schulz S, Erdmann K, Domschke W, et al. Beyond gastric acid reduction: proton pump inhibitors induce heme oxygenase-1 in gastric and endothelial cells. Biochem Biophys Res Commun. 2006;345(3):1014-21.
55. Nath KA. Heme oxygenase-1 and acute kidney injury. Current opinion in nephrology and hypertension. 2014;23(1):17-24.
56. Wu D, Qiu T, Zhang Q, Kang H, Yuan S, Zhu L, et al. Systematic toxicity mechanism analysis of proton pump inhibitors: an in silico study. Chem Res Toxicol. 2015;28(3):419-30.
57. Liu W, Baker SS, Trinidad J, Burlingame AL, Baker RD, Forte JG, et al. Inhibition of lysosomal enzyme activities by proton pump inhibitors. J Gastroenterol. 2013;48(12):1343-52.



**Table 1:** Baseline demographic and health characteristics of overall primary cohort of new users of acid suppression therapy, by type of acid suppressant at time of cohort entry, and those who were ever exposed to PPI.

|                                                         | Overall cohort | New users of H2 Blockers at time of cohort entry | New users of PPI at time of cohort entry | Ever exposed to PPI <sup>a</sup> | P Value <sup>b</sup> |        |
|---------------------------------------------------------|----------------|--------------------------------------------------|------------------------------------------|----------------------------------|----------------------|--------|
| N                                                       | 349312         | 73335                                            | 275977                                   | 309113                           |                      |        |
| Age (SD)                                                | 61.00 (14.92)  | 58.48 (15.13)                                    | 61.67 (14.79)                            | 61.37 (14.77)                    | <0.001               |        |
| eGFR in mL/min/1.73m <sup>2</sup> (SD)                  | 76.89 (22.66)  | 79.64 (21.96)                                    | 76.16 (22.79)                            | 76.60 (22.79)                    | <0.001               |        |
| Number of outpatient serum creatinine measurements (SD) | 6.85 (7.55)    | 6.67 (7.39)                                      | 6.89 (7.59)                              | 7.27 (8.00)                      | <0.001               |        |
| Number of hospitalizations (SD)                         | 0.51 (1.39)    | 0.52 (1.45)                                      | 0.51 (1.37)                              | 0.56 (1.49)                      | 0.014                |        |
| Race                                                    | White (%)      | 275473 (78.86)                                   | 56530 (77.08)                            | 218943 (79.33)                   | 244230 (79.01)       | <0.001 |
|                                                         | Black (%)      | 59243 (16.96)                                    | 13229 (18.04)                            | 46014 (16.67)                    | 52207 (16.89)        |        |
|                                                         | Other (%)      | 14596 (4.18)                                     | 3576 (4.88)                              | 11020 (3.99)                     | 12676 (4.10)         |        |
| Sex                                                     | Male (%)       | 326659 (93.51)                                   | 67748 (92.38)                            | 258911 (93.82)                   | 289233 (93.57)       | <0.001 |
|                                                         | Female (%)     | 22653 (6.49)                                     | 5587 (7.62)                              | 17066 (6.18)                     | 19880 (6.43)         |        |
| Diabetes mellitus (%)                                   | 90273 (25.84)  | 16758 (22.85)                                    | 73515 (26.64)                            | 82168 (26.58)                    | <0.001               |        |
| Hypertension (%)                                        | 225899 (64.67) | 44502 (60.68)                                    | 181397 (65.73)                           | 203700 (65.90)                   | <0.001               |        |
| Chronic lung disease (%)                                | 70281 (20.12)  | 13849 (18.88)                                    | 56432 (20.45)                            | 64777 (20.96)                    | <0.001               |        |
| Peripheral artery disease (%)                           | 11439 (3.27)   | 2225 (3.03)                                      | 9214 (3.34)                              | 10680 (3.46)                     | <0.001               |        |
| Cardiovascular disease (%)                              | 98137 (28.09)  | 17436 (23.78)                                    | 80701 (29.24)                            | 89878 (29.08)                    | <0.001               |        |
| Cerebrovascular disease (%)                             | 1858 (0.53)    | 372 (0.51)                                       | 1486 (0.54)                              | 1719 (0.56)                      | 0.30                 |        |
| Dementia (%)                                            | 16421(4.70)    | 3115 (4.25)                                      | 13306 (4.82)                             | 15384 (4.98)                     | <0.001               |        |
| Hyperlipidemia (%)                                      | 200397 (57.37) | 39818 (54.30)                                    | 160579 (58.19)                           | 181524 (58.72)                   | <0.001               |        |
| Hepatitis C (%)                                         | 5034 (1.44)    | 1184 (1.61)                                      | 3850 (1.40)                              | 4444 (1.44)                      | <0.001               |        |
| HIV (%)                                                 | 114 (0.03)     | 38 (0.05)                                        | 76 (0.03)                                | 113 (0.04)                       | 0.001                |        |
| Cancer (%)                                              | 49666 (14.22)  | 9123 (12.44)                                     | 40543 (14.69)                            | 45633 (14.76)                    | <0.001               |        |
| GERD (%)                                                | 100980 (28.91) | 20562 (28.04)                                    | 80418 (29.14)                            | 94517 (30.58)                    | <0.001               |        |
| Upper GI tract bleeding (%)                             | 9310 (2.67)    | 926 (1.26)                                       | 8384 (3.04)                              | 9098 (2.94)                      | <0.001               |        |
| Ulcer disease (%)                                       | 25626 (7.34)   | 3564 (4.86)                                      | 22062 (7.99)                             | 24864 (8.04)                     | <0.001               |        |
| H. Pylori infection (%)                                 | 3078 (0.88)    | 141 (0.19)                                       | 2937 (1.06)                              | 3239 (1.05)                      | <0.001               |        |
| Barrett's esophagus (%)                                 | 2324 (0.67)    | 89 (0.12)                                        | 2235 (0.81)                              | 2382 (0.77)                      | <0.001               |        |
| Achalasia (%)                                           | 151 (0.04)     | 10 (0.01)                                        | 141 (0.05)                               | 154 (0.05)                       | <0.001               |        |
| Stricture (%)                                           | 1992 (0.57)    | 132 (0.18)                                       | 1860 (0.67)                              | 2051 (0.66)                      | <0.001               |        |
| Esophageal                                              | 213 (0.06)     | 17 (0.02)                                        | 196 (0.07)                               | 213 (0.07)                       | <0.001               |        |

|                                                                   |                                                            |                                  |                                    |                       |                       |        |
|-------------------------------------------------------------------|------------------------------------------------------------|----------------------------------|------------------------------------|-----------------------|-----------------------|--------|
| 1<br>2<br>3<br>4<br>5<br>6<br>7<br>8<br>9<br>10<br>11<br>12<br>13 | adenocarcinoma (%)                                         |                                  |                                    |                       |                       |        |
|                                                                   | Years of follow up (IQR) <sup>c</sup>                      | 5.71<br>(5.11 – 6.37)            | 4.38<br>(1.16 – 5.92) <sup>d</sup> | 5.67<br>(5.09 – 6.34) | 5.59<br>(4.82 – 6.28) | <0.001 |
|                                                                   | Days of having related prescription during follow-up (IQR) | 442<br>(199 – 1272) <sup>e</sup> | 120<br>(60 – 400) <sup>d</sup>     | 450<br>(120 – 1299)   | 450<br>(120 – 1266)   | <0.001 |
|                                                                   | Death (%)                                                  | 81463 (23.32)                    | 9018 (12.30) <sup>d</sup>          | 67450 (24.44)         | 72445 (23.44)         | <0.001 |
|                                                                   | Incident death in 100 person years (95% CI)                | 4.47<br>(4.44 – 4.50)            | 3.32<br>(3.25 – 3.39) <sup>d</sup> | 4.74<br>(4.70 – 4.77) | 4.67<br>(4.64 – 4.71) | <0.001 |

- 14 a. Includes patients exposed to PPI at T0 (n=275977) and during follow-up (n=33136).  
Variables were measured at time of PPI exposure.
- 15 b. P value for difference between exposed to H2 at T0 and exposed to PPI at T0
- 16 c. From T0 to first occurrence of death or September 30, 2013
- 17 d. Outcome measured from T0 to first occurrence of exposure PPI, death or September 30, 2007
- 18 e. Days of having PPI or H2 blockers

22 Abbreviations: CI, Confidence interval; eGFR, estimated Glomerular Filtration Rate; GERD,  
23 Gastroesophageal Reflux Disease; HIV, human immunodeficiency virus; IQR, interquartile range;  
24 SD, Standard deviation

**Table 2:** Association between PPI use and risk of death:

| Association Between PPI and Death                                                               |                        | Reference             | PPI use               |
|-------------------------------------------------------------------------------------------------|------------------------|-----------------------|-----------------------|
| PPI use VS H2 blockers use (N=349,312)                                                          | Incident rate (95% CI) | 3.32<br>(3.25 – 3.39) | 4.67<br>(4.64 – 4.71) |
|                                                                                                 | Unadjusted HR (95% CI) | 1                     | 1.46<br>(1.43 – 1.49) |
|                                                                                                 | Adjusted HR (95% CI)   | 1                     | 1.25<br>(1.23 – 1.28) |
| High-dimensional propensity score adjusted model of new users of PPI VS H2 blockers (N=349,312) | Incident rate (95% CI) | 3.32<br>(3.25 – 3.39) | 4.74<br>(4.70, 4.77)  |
|                                                                                                 | HR (95% CI)            | 1                     | 1.16<br>(1.13 – 1.18) |
| Two-stage residual inclusion estimation model of new users of PPI VS H2 blockers (N=318,960)    | Incident rate (95% CI) | 3.32<br>(3.25 – 3.39) | 4.74<br>(4.70 – 4.77) |
|                                                                                                 | HR (95% CI)            | 1                     | 1.21<br>(1.16 – 1.26) |
| Time dependent propensity score matched PPI VS H2 blockers (N=146,670)                          | Incident rate (95% CI) | 3.32<br>(3.25 – 3.39) | 4.37<br>(4.30 – 4.44) |
|                                                                                                 | Unadjusted HR (95% CI) | 1                     | 1.38<br>(1.34 – 1.42) |
|                                                                                                 | Adjusted HR (95% CI)   | 1                     | 1.34<br>(1.29 – 1.39) |
| PPI use VS no PPI (N=3,288,092)                                                                 | Incident rate (95% CI) | 3.64<br>(3.63 – 3.65) | 5.50<br>(5.47 – 5.53) |
|                                                                                                 | Unadjusted HR (95% CI) | 1                     | 1.47<br>(1.46 – 1.48) |
|                                                                                                 | Adjusted HR (95% CI)   | 1                     | 1.15<br>(1.14 – 1.15) |
| PPI use VS no PPI or H2 blockers (N=2,886,879)                                                  | Incident rate (95% CI) | 3.47<br>(3.46 – 3.48) | 5.50<br>(5.47 – 5.53) |
|                                                                                                 | Unadjusted HR (95% CI) | 1                     | 1.53<br>(1.52 – 1.54) |
|                                                                                                 | Adjusted HR (95% CI)   | 1                     | 1.23<br>(1.22 – 1.24) |
| PPI VS H2 blockers in a cohort without GI conditions (N=214,521)                                | Incident rate (95% CI) | 3.80<br>(3.71 – 3.89) | 5.39<br>(5.34 – 5.44) |
|                                                                                                 | Unadjusted HR (95% CI) | 1                     | 1.47<br>(1.43 – 1.51) |
|                                                                                                 | Adjusted HR (95% CI)   | 1                     | 1.24<br>(1.21 – 1.27) |
| PPI VS no PPI in a cohort without GI conditions (N=2,790,697)                                   | Incident rate (95% CI) | 3.54<br>(3.53 – 3.55) | 5.89<br>(5.86 – 5.93) |
|                                                                                                 | Unadjusted HR (95% CI) | 1                     | 1.62<br>(1.61 – 1.63) |
|                                                                                                 | Adjusted HR (95% CI)   | 1                     | 1.19<br>(1.18 – 1.20) |



|                                                                                                                                                                                                                                                                                                                                                                                                                                                                                                                                                                                                                                                                                                                                                                                                                                                                                                                                                                                                                                                                                                              |                        |                       |                       |
|--------------------------------------------------------------------------------------------------------------------------------------------------------------------------------------------------------------------------------------------------------------------------------------------------------------------------------------------------------------------------------------------------------------------------------------------------------------------------------------------------------------------------------------------------------------------------------------------------------------------------------------------------------------------------------------------------------------------------------------------------------------------------------------------------------------------------------------------------------------------------------------------------------------------------------------------------------------------------------------------------------------------------------------------------------------------------------------------------------------|------------------------|-----------------------|-----------------------|
| PPI VS no PPI or H2 blockers in a cohort without GI conditions (N=2,543,480)                                                                                                                                                                                                                                                                                                                                                                                                                                                                                                                                                                                                                                                                                                                                                                                                                                                                                                                                                                                                                                 | Incident rate (95% CI) | 3.45<br>(3.44 – 3.46) | 5.89<br>(5.86 – 5.93) |
|                                                                                                                                                                                                                                                                                                                                                                                                                                                                                                                                                                                                                                                                                                                                                                                                                                                                                                                                                                                                                                                                                                              | Unadjusted HR (95% CI) | 1                     | 1.65<br>(1.64 – 1.67) |
|                                                                                                                                                                                                                                                                                                                                                                                                                                                                                                                                                                                                                                                                                                                                                                                                                                                                                                                                                                                                                                                                                                              | Adjusted HR (95% CI)   | 1                     | 1.22<br>(1.21 – 1.23) |
| PPI VS H2 blockers in a cohort without GI conditions except for GERD (N=311,115)                                                                                                                                                                                                                                                                                                                                                                                                                                                                                                                                                                                                                                                                                                                                                                                                                                                                                                                                                                                                                             | Incident rate (95% CI) | 3.30<br>(3.23 – 3.37) | 4.51<br>(4.47 – 4.54) |
|                                                                                                                                                                                                                                                                                                                                                                                                                                                                                                                                                                                                                                                                                                                                                                                                                                                                                                                                                                                                                                                                                                              | Unadjusted HR (95% CI) | 1                     | 1.42<br>(1.38 – 1.45) |
|                                                                                                                                                                                                                                                                                                                                                                                                                                                                                                                                                                                                                                                                                                                                                                                                                                                                                                                                                                                                                                                                                                              | Adjusted HR (95% CI)   | 1                     | 1.24<br>(1.21 – 1.27) |
| PPI VS no PPI in a cohort without GI conditions except for GERD (N=3,132,126)                                                                                                                                                                                                                                                                                                                                                                                                                                                                                                                                                                                                                                                                                                                                                                                                                                                                                                                                                                                                                                | Incident rate (95% CI) | 3.59<br>(3.58 – 3.60) | 5.36<br>(5.34 – 5.39) |
|                                                                                                                                                                                                                                                                                                                                                                                                                                                                                                                                                                                                                                                                                                                                                                                                                                                                                                                                                                                                                                                                                                              | Unadjusted HR (95% CI) | 1                     | 1.45<br>(1.44 – 1.46) |
|                                                                                                                                                                                                                                                                                                                                                                                                                                                                                                                                                                                                                                                                                                                                                                                                                                                                                                                                                                                                                                                                                                              | Adjusted HR (95% CI)   | 1                     | 1.14<br>(1.13 – 1.14) |
| PPI VS no PPI or H2 blockers in a cohort without GI conditions except for GERD (N=2,678,478)                                                                                                                                                                                                                                                                                                                                                                                                                                                                                                                                                                                                                                                                                                                                                                                                                                                                                                                                                                                                                 | Incident rate (95% CI) | 3.44<br>(3.44 – 3.45) | 5.36<br>(5.34 – 5.39) |
|                                                                                                                                                                                                                                                                                                                                                                                                                                                                                                                                                                                                                                                                                                                                                                                                                                                                                                                                                                                                                                                                                                              | Unadjusted HR (95% CI) | 1                     | 1.50<br>(1.49 – 1.51) |
|                                                                                                                                                                                                                                                                                                                                                                                                                                                                                                                                                                                                                                                                                                                                                                                                                                                                                                                                                                                                                                                                                                              | Adjusted HR (95% CI)   | 1                     | 1.22<br>(1.21 – 1.22) |
| <p>a. Incident rate as incident death in 100 person years</p> <p>b. All models except time dependent propensity score matched and high-dimensional propensity score adjusted models were time dependent models. Effect of PPI was treated as time dependent and was defined as once patients used PPI, they were in PPI group during the remaining follow-up.</p> <p>c. Adjusted model controlling for eGFR, age, race, gender, number of serum creatinine measurements, number of hospitalizations, diabetes mellitus, hypertension, cardiovascular disease, peripheral artery disease, cerebrovascular disease, chronic lung disease, hepatitis C, HIV, dementia, cancer, GERD, upper GI tract bleeding, ulcer disease, H. Pylori infection, Barrett's esophagus, achalasia, stricture and esophageal adenocarcinoma, unless used in analysis inclusion criteria.</p> <p>d. GI conditions include upper GI tract bleeding, ulcer disease, H. Pylori infection, Barrett's esophagus, achalasia, stricture and esophageal adenocarcinoma</p> <p>Abbreviations: CI, Confidence interval; HR, Hazard Ratio</p> |                        |                       |                       |

**Table 3:** Duration of exposure to PPI and risk of death among new users of PPI (n=166,098)

| Duration (Days)                                                                                                                                                                                                                                                                                                                                                                                                                                                                                                                                                              | ≤ 30             | 31 - 90             | 91 - 180            | 181 - 360           | 361 - 720           |
|------------------------------------------------------------------------------------------------------------------------------------------------------------------------------------------------------------------------------------------------------------------------------------------------------------------------------------------------------------------------------------------------------------------------------------------------------------------------------------------------------------------------------------------------------------------------------|------------------|---------------------|---------------------|---------------------|---------------------|
| N (%)                                                                                                                                                                                                                                                                                                                                                                                                                                                                                                                                                                        | 24748<br>(14.90) | 39345<br>(23.69)    | 29334<br>(17.66)    | 33907<br>(20.41)    | 38764<br>(23.34)    |
| Hazard Ratio (95%CI)                                                                                                                                                                                                                                                                                                                                                                                                                                                                                                                                                         | 1                | 1.05<br>(1.02-1.08) | 1.17<br>(1.13-1.20) | 1.31<br>(1.27-1.34) | 1.51<br>(1.47-1.56) |
| a. Within people exposure to PPI between 1 to 720 days<br>b. Model controls for eGFR, age, race, gender, number of serum creatinine measurements, number of hospitalizations, diabetes mellitus, hypertension, cardiovascular disease, peripheral artery disease, cerebrovascular disease, chronic lung disease, hepatitis C, HIV, dementia, cancer, GERD, upper GI tract bleeding, ulcer disease, H. Pylori infection, Barrett's esophagus, achalasia, stricture and esophageal adenocarcinoma<br>c. Time zero defined as date when the patients last PPI prescription ends |                  |                     |                     |                     |                     |

1  
2  
3 **Figure legends:**  
4  
5

6 **Figure 1:** Survival curves for PPI and H2 blockers  
7

8 **Figure 2:** Duration of PPI exposure and risk of death among new PPI users (n=166,098)  
9  
10

11  
12  
13  
14  
15  
16  
17 **Supplemental Figures:**  
18  
19

20 **Supplemental figure 1:** Duration of PPI exposure and risk of death among new PPI users in an older (less  
21 contemporary) sensitivity cohort (n=101,109)  
22  
23  
24

25  
26 **Supplemental figure 2: Estimation of the impact of uncontrolled confounder using the rule-out**  
27

28 **approach:** To investigate the impact of potential residual confounding; rule-out approach was used, where  
29 prevalence of potential confounder was set at 30% and prevalence of exposure (PPI use) was set at 88.5%  
30 (the latter is derived from our data). The X axis describes the Odds Ratio (OR) of the association between the  
31 confounder and PPI users. The Y axis describes the Hazard Ratio (HR) of the association between the  
32 confounder and risk of death. The blue line splits the area into two: the upper right area represents all  
33 parameter combinations of OR (between PPI use and confounder) and HR (between confounder and death)  
34 that are strong enough to move the apparent HR (AHR) from 1.25 (the HR observed in our primary analysis) to  
35 1 or lower, rejecting the hypothesis of an association between PPI use and risk of death. The corollary  
36 observation is that the area to the lower left represents all parameter combinations that would result in  
37 acceptance of the primary hypothesis. For example, the results show that for uncontrolled confounder that is  
38 twice as likely among PPI users (OR=2), the strength of the association between the uncontrolled confounder  
39 and risk of death would have to exceed 4 (HR>4) for the uncontrolled confounder to fully explain the observed  
40 association between PPI and death (where the combination of OR=2, HR>4 is in the area above the blue line).  
41  
42  
43  
44  
45  
46  
47  
48  
49  
50  
51  
52  
53  
54  
55  
56  
57  
58  
59  
60

1  
2  
3  
4 **Supplemental figure 3: External adjustment to estimate the impact of 3 unmeasured confounders: To**

5 investigate the impact of potential residual confounding, we applied external adjustment to estimate the impact  
6 of 3 unmeasured confounders including obesity, smoking, and use of therapeutics including anticoagulants,  
7 antiplatelet agents, and non-steroidal anti-inflammatory drugs. In order to generate extreme bias estimates  
8 (against the hypothesis) we assumed that users of H2 Blockers are generally healthy and have similar health  
9 characteristics as the general population. We used published estimates from external data sources as follows  
10 (2, 39-42): Prevalence of obesity 30.00%, OR for PPI and obesity=1.30, and HR for obesity and death =1.30;  
11 prevalence of smoking=24.79%, OR for PPI and smoking =1.20, and HR for smoking and death =2.80;  
12 prevalence of anticoagulants, antiplatelet, and NSAIDs use=28.85%, OR for PPI and drug =2.20, and HR for  
13 drug and death =1.30. Given the HR between each confounder and risk of death, and assuming there is no  
14 overlap in risk among confounders (which is an unlikely assumption, but one which would generate the  
15 greatest amount of bias against our hypothesis), we found a total positive bias (or net confounding bias) of  
16 9.66% (1.47%+4.23%+3.96%). The total bias could move a null association between PPI to death from  
17 HR=1.00 to HR=1.10 (reflecting the net positive bias of 9.66% rounded up to 10.0%). The association we  
18 observed between PPI and death is 1.25 (higher than 1.10), suggesting that it cannot be fully due to bias of  
19 unmeasured confounding. (Using the curves in the figures; for obesity, when the HR=1.30, the corresponding  
20 bias=1.47%; for smoking, when the HR=2.80, the corresponding bias=4.23%; for anticoagulants, antiplatelet,  
21 and NSAIDs, when the HR=1.30, the corresponding bias=3.96%).  
22  
23  
24  
25  
26  
27  
28  
29  
30  
31  
32  
33  
34  
35  
36  
37  
38  
39  
40  
41  
42  
43  
44  
45  
46  
47  
48  
49  
50  
51  
52  
53  
54  
55  
56  
57  
58  
59  
60

**Supplemental table 1:** Baseline demographic and health characteristics of the overall 2001 cohort of new users of acid suppression therapy, by type of acid suppressant at time of cohort entry, and those who were ever exposed to PPI.

|                                                         | Overall cohort | New users of H2 Blockers at time of cohort entry | New users of PPI at time of cohort entry | Ever exposed to PPI <sup>a</sup> | P Value <sup>b</sup> |        |
|---------------------------------------------------------|----------------|--------------------------------------------------|------------------------------------------|----------------------------------|----------------------|--------|
| N                                                       | 396884         | 208492                                           | 188392                                   | 293265                           |                      |        |
| Age (SD)                                                | 62.98 (13.05)  | 61.93 (13.24)                                    | 64.14 (12.74)                            | 63.78 (12.81)                    | <0.001               |        |
| eGFR in mL/min/1.73m <sup>2</sup> (SD)                  | 74.74 (22.43)  | 76.24 (22.04)                                    | 73.09 (22.73)                            | 73.38 (22.61)                    | <0.001               |        |
| Number of outpatient serum creatinine measurements (SD) | 3.01 (3.40)    | 2.95 (3.23)                                      | 3.06 (3.58)                              | 4.52 (5.51)                      | <0.001               |        |
| Number of hospitalizations (SD)                         | 0.37 (0.96)    | 0.36 (0.95)                                      | 0.38 (0.97)                              | 0.51 (1.30)                      | <0.001               |        |
| Race                                                    | White (%)      | 318534 (80.26)                                   | 164295 (78.80)                           | 154239 (81.87)                   | 236930 (80.79)       | <0.001 |
|                                                         | Black (%)      | 58355 (14.70)                                    | 32053 (15.37)                            | 26302 (13.96)                    | 42498 (14.49)        |        |
|                                                         | Other (%)      | 19995 (5.04)                                     | 12144 (5.82)                             | 7851 (4.17)                      | 13837 (4.72)         |        |
| Sex                                                     | Male (%)       | 377769 (95.18)                                   | 197685 (94.82)                           | 180084 (95.59)                   | 279023 (95.14)       | <0.001 |
|                                                         | Female (%)     | 19115 (4.82)                                     | 10807 (5.18)                             | 8308 (4.41)                      | 14242 (4.86)         |        |
| Diabetes mellitus (%)                                   | 92555 (23.32)  | 46562 (22.33)                                    | 45993 (24.41)                            | 74344 (25.35)                    | <0.001               |        |
| Hypertension (%)                                        | 231296 (58.28) | 119554 (57.34)                                   | 111742 (59.31)                           | 184529 (62.92)                   | <0.001               |        |
| Chronic lung disease (%)                                | 75810 (19.10)  | 39270 (18.84)                                    | 36540 (19.40)                            | 64254 (21.91)                    | <0.001               |        |
| Peripheral artery disease (%)                           | 9141 (2.30)    | 4646 (2.23)                                      | 4495 (2.39)                              | 8751 (2.98)                      | 0.001                |        |
| Cardiovascular disease (%)                              | 122301 (30.82) | 59814 (28.69)                                    | 62487 (33.17)                            | 101220 (34.51)                   | <0.001               |        |
| Cerebrovascular disease (%)                             | 1529 (0.39)    | 776 (0.37)                                       | 753 (0.40)                               | 1419 (0.48)                      | 0.16                 |        |
| Dementia (%)                                            | 12031 (3.03)   | 6094 (2.92)                                      | 5937 (3.15)                              | 10615 (3.62)                     | <0.001               |        |
| Hyperlipidemia (%)                                      | 152040 (38.31) | 78546 (37.67)                                    | 73494 (39.01)                            | 130557 (44.52)                   | <0.001               |        |
| Hepatitis C (%)                                         | 9332 (2.35)    | 4832 (2.32)                                      | 4500 (2.39)                              | 8456 (2.88)                      | 0.14                 |        |
| HIV (%)                                                 | 209 (0.05)     | 105 (0.05)                                       | 104 (0.06)                               | 183 (0.06)                       | 0.51                 |        |
| Cancer (%)                                              | 46451 (11.70)  | 23312 (11.18)                                    | 23139 (12.28)                            | 39473 (13.46)                    | <0.001               |        |
| GERD (%)                                                | 110217 (27.77) | 52586 (25.22)                                    | 57631 (30.59)                            | 114132 (38.92)                   | <0.001               |        |
| Upper GI tract bleeding (%)                             | 11282 (2.84)   | 3352 (1.61)                                      | 7930 (4.21)                              | 12458 (4.25)                     | <0.001               |        |
| Ulcer disease (%)                                       | 35189 (8.87)   | 14152 (6.79)                                     | 21037 (11.17)                            | 37472 (12.78)                    | <0.001               |        |

|   |                                                            |                               |                                 |                    |                    |        |
|---|------------------------------------------------------------|-------------------------------|---------------------------------|--------------------|--------------------|--------|
| 1 | H. Pylori infection (%)                                    | 2599 (0.65)                   | 477 (0.23)                      | 2122 (1.13)        | 3795 (1.29)        | <0.001 |
| 2 | Barrett's esophagus (%)                                    | 0 (0.00)                      | 0 (0.00)                        | 0 (0.00)           | 245 (0.08)         | NA     |
| 3 | Achalasia (%)                                              | 188 (0.05)                    | 41 (0.02)                       | 147 (0.08)         | 245 (0.08)         | <0.001 |
| 4 | Stricture (%)                                              | 2218 (0.56)                   | 415 (0.20)                      | 1803 (0.96)        | 2953 (1.01)        | <0.001 |
| 5 | Esophageal adenocarcinoma (%)                              | 223 (0.06)                    | 79 (0.04)                       | 147 (0.08)         | 262 (0.09)         | <0.001 |
| 6 | Years of follow up (IQR) <sup>c</sup>                      | 5.65 (5.05 – 6.28)            | 3.35 (1.01 – 5.71) <sup>d</sup> | 5.51 (5.01 – 6.08) | 5.23 (3.22 – 5.90) | <0.001 |
| 7 | Days of having related prescription during follow-up (IQR) | 587 (168 – 1423) <sup>e</sup> | 188 (90 – 561) <sup>d</sup>     | 621 (171 – 1496)   | 579 (172 – 1350)   | <0.001 |
| 8 | Death (%)                                                  | 102802 (25.90)                | 31260 (14.99) <sup>d</sup>      | 51785 (27.49)      | 71565 (24.40)      | <0.001 |
| 9 | Incident death in 100 person years (95% CI)                | 5.08 (5.05 – 5.11)            | 4.40 (4.35 – 4.45) <sup>d</sup> | 5.56 (5.51 – 5.61) | 5.45 (5.41 – 5.49) | <0.001 |

- 10
- 11
- 12
- 13
- 14
- 15
- 16
- 17
- 18
- 19
- 20
- 21
- 22
- 23
- 24
- 25
- 26
- 27
- 28
- 29
- 30
- 31
- 32
- 33
- 34
- 35
- 36
- 37
- 38
- 39
- 40
- 41
- 42
- 43
- 44
- 45
- 46
- 47
- 48
- 49
- 50
- 51
- 52
- 53
- 54
- 55
- 56
- 57
- 58
- 59
- 60
- Includes patients exposed to PPI at T0 (n=275977) and during follow-up (n=33136). Variables were measured at time of PPI exposure.
  - P value for difference between exposed to H2 at T0 and exposed to PPI at T0
  - From T0 to first occurrence of death or September 30, 2013
  - Outcome measured from T0 to first occurrence of exposure PPI, death or September 30, 2007
  - Days of having PPI or H2 blockers

Abbreviations: CI, Confidence interval; eGFR, estimated Glomerular Filtration Rate; GERD, Gastroesophageal Reflux Disease; HIV, human immunodeficiency virus; IQR, interquartile range; NA, Not Applicable; SD, Standard deviation

**Supplemental table 2:** Duration of exposure to PPI and risk of death among new users of PPI in the 2001 cohort (n=101,109)

| Duration (Days)                                                                                                                                                                                                                                                                                                                                                                                                                                                                                                                                                                            | ≤ 30             | 31 - 90              | 91 - 180             | 181 - 360            | 361 - 720            |
|--------------------------------------------------------------------------------------------------------------------------------------------------------------------------------------------------------------------------------------------------------------------------------------------------------------------------------------------------------------------------------------------------------------------------------------------------------------------------------------------------------------------------------------------------------------------------------------------|------------------|----------------------|----------------------|----------------------|----------------------|
| N (%)                                                                                                                                                                                                                                                                                                                                                                                                                                                                                                                                                                                      | 15204<br>(15.04) | 20409<br>(20.19)     | 17137<br>(16.95)     | 21586<br>(21.35)     | 26773<br>(26.48)     |
| Hazard Ratio (95%CI)                                                                                                                                                                                                                                                                                                                                                                                                                                                                                                                                                                       | 1                | 1.04<br>(1.01, 1.07) | 1.11<br>(1.08, 1.15) | 1.18<br>(1.15, 1.22) | 1.28<br>(1.24, 1.31) |
| <p>a. Within people exposure to PPI between 1 to 720 days</p> <p>b. Model controls for eGFR, age, race, gender, number of serum creatinine measurements, number of hospitalizations, diabetes mellitus, hypertension, cardiovascular disease, peripheral artery disease, cerebrovascular disease, chronic lung disease, hepatitis C, HIV, dementia, cancer, GERD, upper GI tract bleeding, ulcer disease, H. Pylori infection, Barrett's esophagus, achalasia, stricture and esophageal adenocarcinoma</p> <p>c. Time zero defined as date when the patients last PPI prescription end</p> |                  |                      |                      |                      |                      |



Figure 1

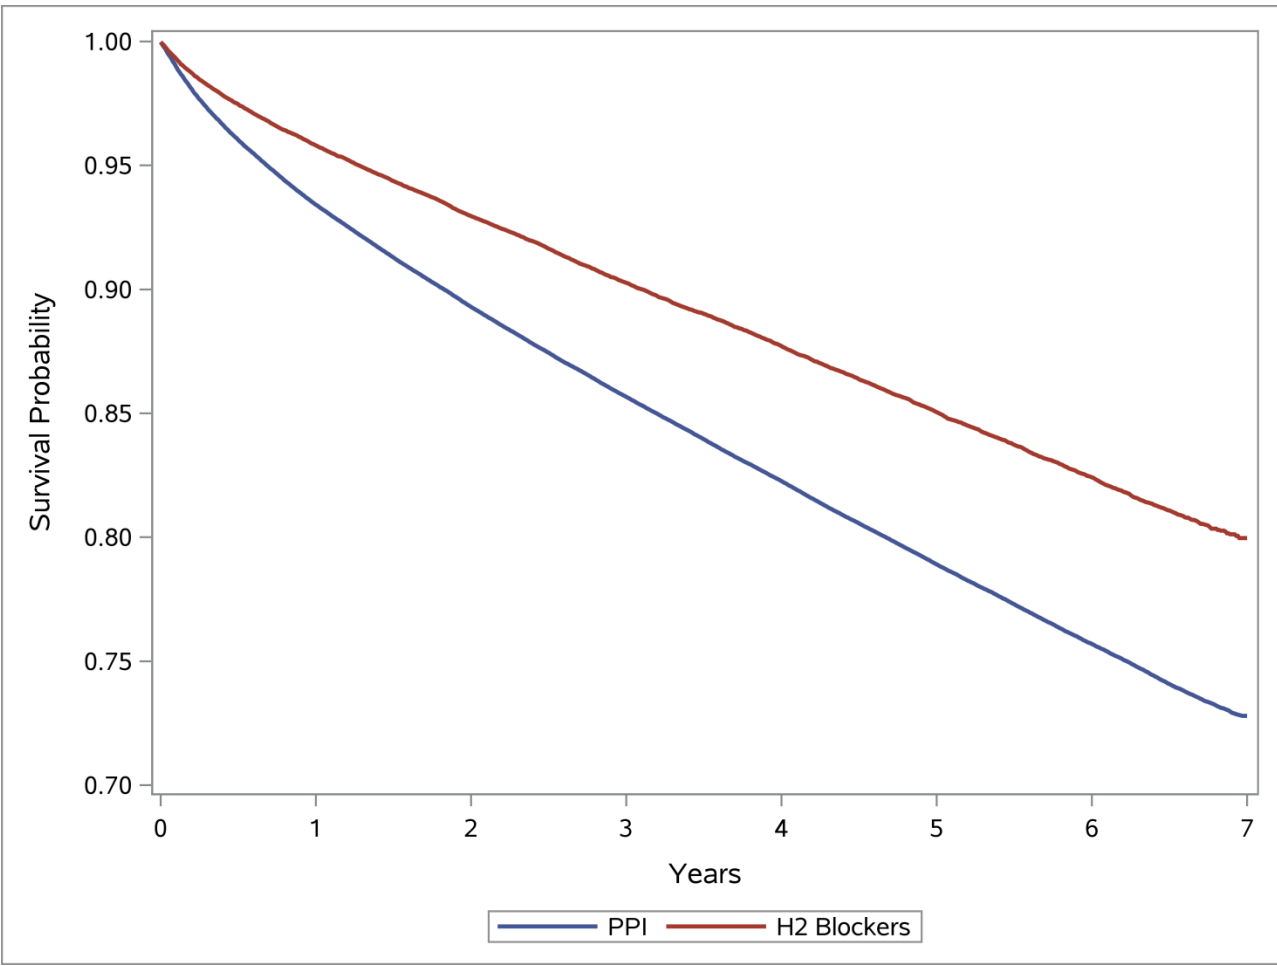

1  
2  
3  
4  
5  
6  
7  
8  
9  
10  
11  
12  
13  
14  
15  
16  
17  
18  
19  
20  
21  
22  
23  
24  
25  
26  
27  
28  
29  
30  
31  
32  
33  
34  
35  
36  
37  
38  
39  
40  
41  
42  
43

Figure 2

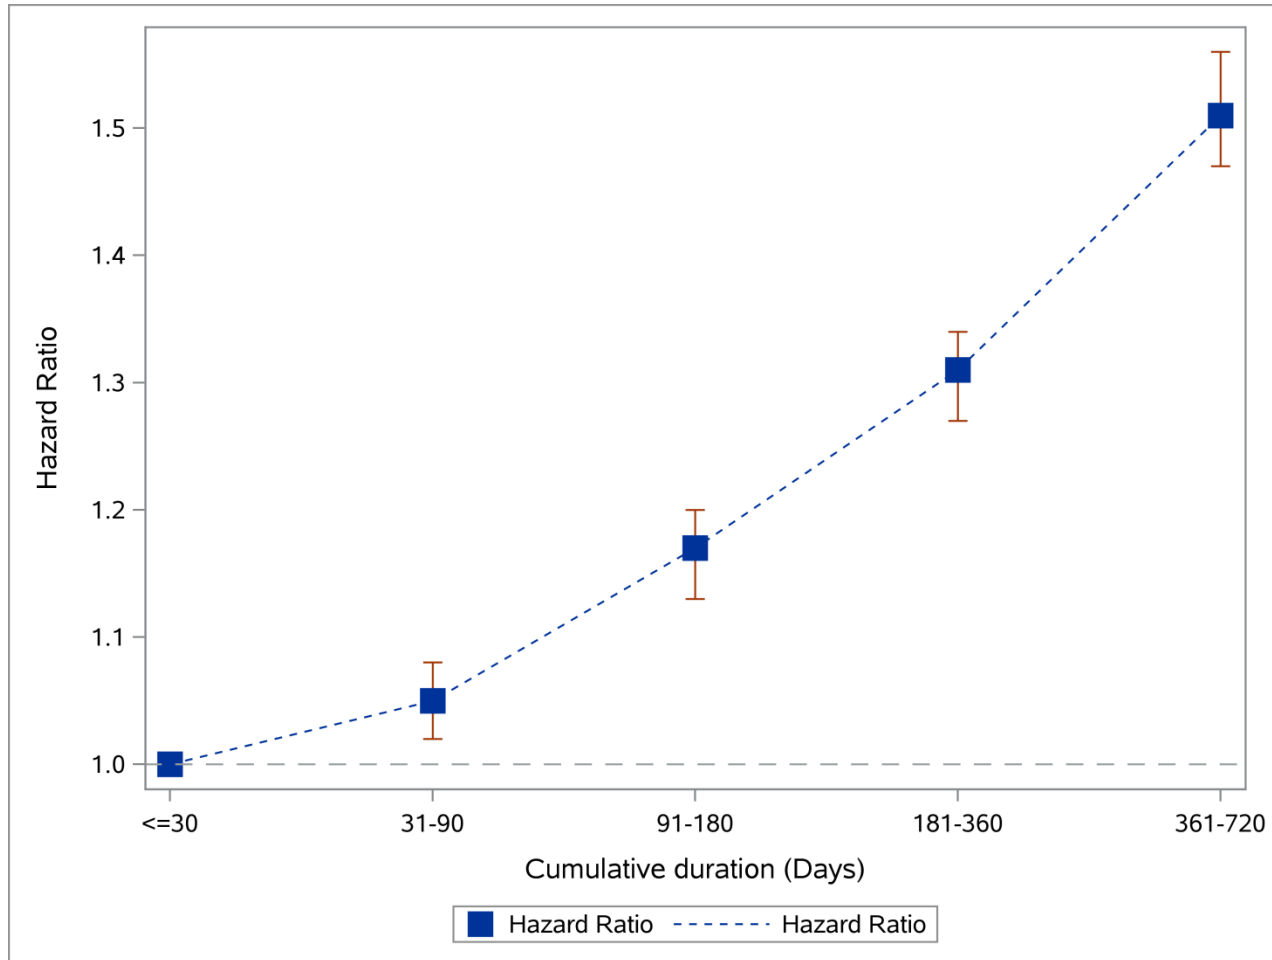

### Supplemental Figure 1

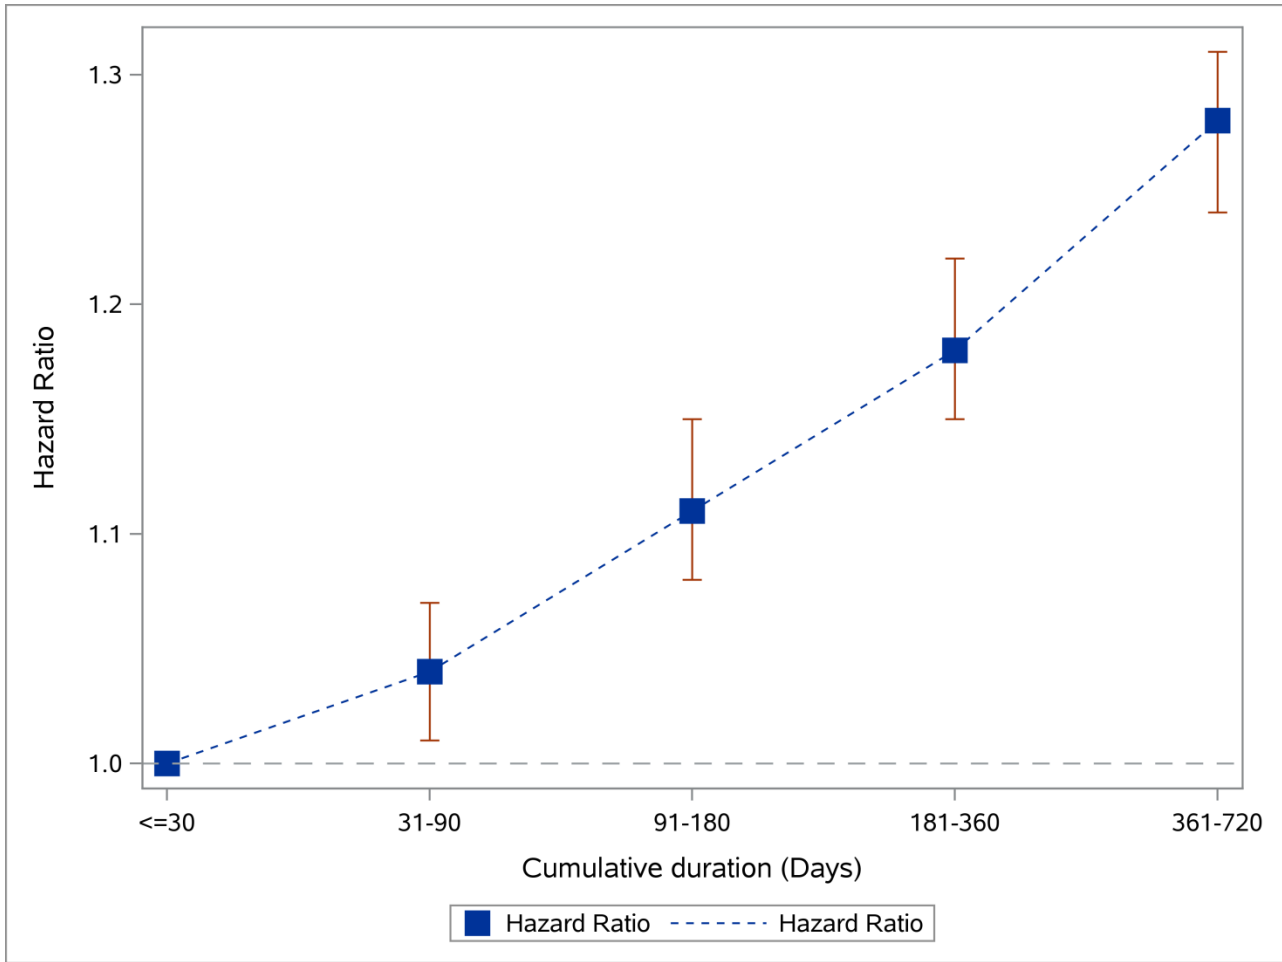

### Supplemental Figure 2

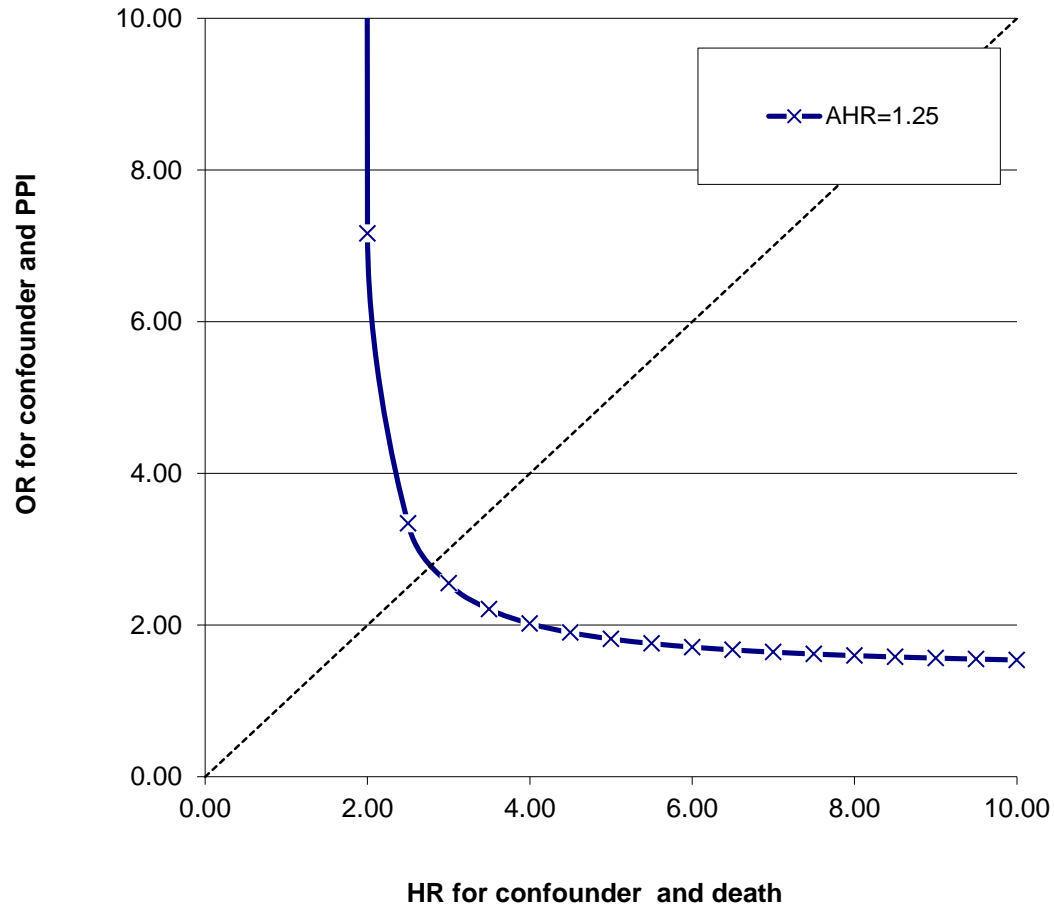

1  
2  
3  
4  
5  
6  
7  
8  
9  
10  
11  
12  
13  
14  
15  
16  
17  
18  
19  
20  
21  
22  
23  
24  
25  
26  
27  
28  
29  
30  
31  
32  
33  
34  
35  
36  
37  
38  
39  
40  
41  
42  
43

# BMJ Open Supplemental Figure 3

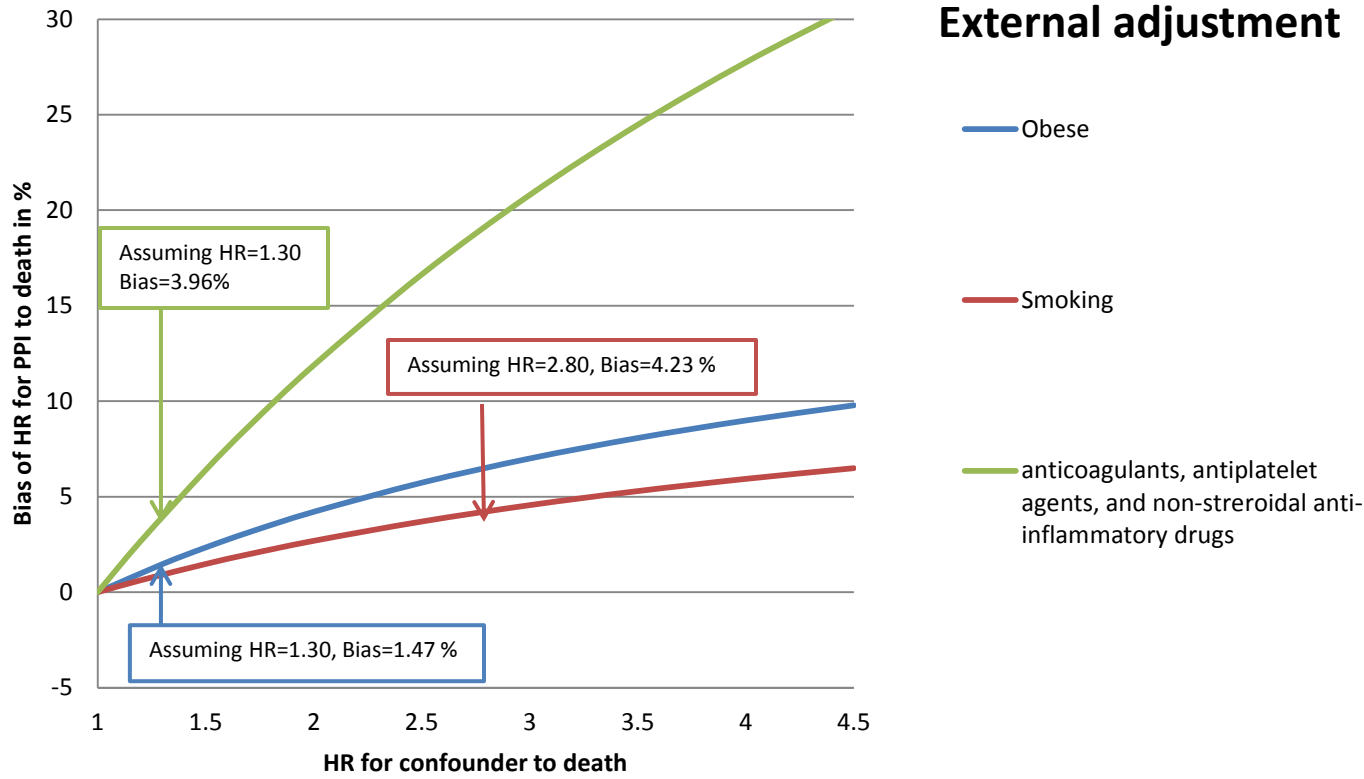

## Supplemental Methods:

### Time Dependent Propensity Score Matching

1. Using the primary cohort (N=349, 312), all covariates except for age, race and gender were treated as time-dependent variables from T0 till date of PPI use or end of follow up, whichever occurred first. Specifically, time-dependent eGFR indicated the eGFR at day t (where the value was equal to the outpatient eGFR measurement most close and prior to time t); time-dependent number of outpatient serum creatinine measurements and number of hospitalizations indicated the cumulative value from October 01, 1998 till day t; time-dependent disease status including diabetes mellitus, hypertension, cardiovascular disease, peripheral artery disease, cerebrovascular disease, chronic lung disease, cancer, hepatitis C, HIV, dementia and diseases associated with acid suppression therapy use such as gastroesophageal reflux disease (GERD), upper gastrointestinal (GI) tract bleeding, ulcer disease, H. Pylori infection, Barrett's esophagus, achalasia, stricture and esophageal adenocarcinoma indicated if participants were diagnosed with the disease between October 01, 1998 and day t.

2. Time-dependent Cox regression was applied, where time until receipt of first PPI prescription was the outcome (participants receiving PPI prescription at T0 were considered to have the event with survival time equal to 0 days). Time-dependent variables from step 1 and age, race and gender were used as predictors in the model in order to obtain parameter estimates for the predictors.

3. Every participant's hazard component at day t was computed based on the parameter estimates from step 2 and their covariate values at day t.

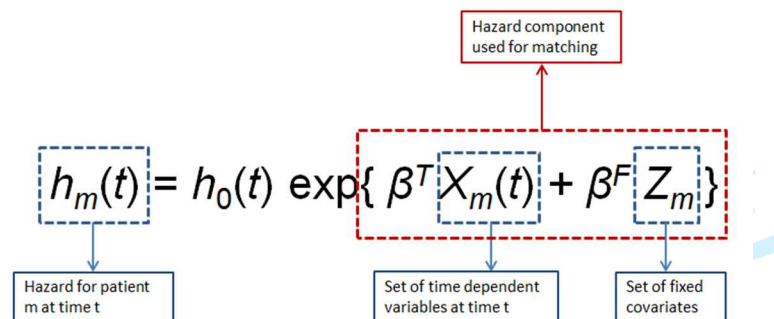

The hazard component was used as the time-dependent propensity score.

4. Beginning from T0 (day 0), a 1:1 sequential greedy matching without replacement was conducted. People who received PPI prescription at day t (case group at day t) were matched with people who had not yet received PPI prescription at day t (control group at day t) based on their propensity score at day

1  
2  
3 t. The order of both case and control groups was randomized before matching. A matched pair was  
4 considered successfully matched only if the propensity score difference was less than 0.2 times the  
5 standard deviation of the hazard component at time t. If no successful match was made the case in the  
6 pair was withdrawn from the further matching while the control was left in the data pool. Matching was  
7 ended when 1/ all participants in control or case group were matched or 2/ day t equaled day 1827.  
8  
9

10  
11  
12  
13 5. After the matching, conditional Cox regressions stratified by matched pairs were conducted to  
14 examine the association between PPI and death.  
15

16 **High-dimensional propensity score:**

17  
18 1. Using the primary cohort (N=349,312), participants data from 1 year before T0 till T0 were collected in  
19 5 dimensions consisting off: the first 3 digits of outpatient diagnoses ICD9 codes, the outpatient  
20 procedures CPT codes, the first 3 digits of inpatient diagnoses ICD9 codes, the first 3 digits of inpatient  
21 procedures ICD9 codes, and the outpatient drug names without dose.  
22  
23

24  
25 2. Within each of the 5 dimensions, the top 300 most frequent items were selected, which yielded  
26  $300*5=1500$  potential items.  
27

28  
29 3. For each participant, we determined if each of the 1500 potential items 1\ ever occurred, 2\ if the  
30 number of occurrences for the participant was higher than the number of occurrences in 50% of the  
31 participants and 3\ if the number of occurrences for the participant was higher than the number of  
32 occurrences in 75% of the participants. This step results in  $1500*3=4500$  binary potential variables. If the  
33 50% or 75% percentile of the number of item occurrences was less than 1, then the variable were coded  
34 as 0 for all participants. If the 50% and 75% percentile of the number of item occurrences had the same  
35 value, then the 75% variable was coded as 0 for all participants.  
36  
37

38  
39  
40 4. Bias was calculated using formula based on apparent relative risk for each of the 4500 variables:  
41

42  
43 
$$\text{Bias} = (P\_C1 (RR\_CD - 1) + 1) / (P\_C0 (RR\_CD - 1) + 1), \text{ if } RR\_CD \geq 1$$

44  
45 
$$\text{Bias} = (P\_C1 (1/RR\_CD - 1) + 1) / (P\_C0 (1/RR\_CD - 1) + 1), \text{ if } RR\_CD < 1$$

46  
47 Where P\_C1 indicates the prevalence of the variable in the PPI group, P\_C0 indicates the prevalence of  
48 the variable in the control group, and RR\_CD indicate relative risk of death associated with the variable.  
49  
50

51  
52  
53 5. The top 500 variables with the largest  $|\log(\text{bias})|$  value were selected as binary empirical covariates  
54 for inclusion in the propensity score modeling.  
55  
56  
57  
58  
59  
60



1  
2  
3 6. The 500 variables and age, gender, race, and eGFR were used to obtain propensity scores from logistic  
4 regression where the outcome was receipt of PPI or not at T0. Propensity scores were then categorized  
5 into deciles.  
6  
7

8  
9  
10 7. Multivariate Cox regression with an indicator for propensity score decile was used to evaluate the  
11 association between PPI and death. Patients in the control group who received PPI later were censored  
12 at the time they received PPI.  
13

### 14 **Two-stage residual inclusion estimation (Instrumental Variable):**

15  
16  
17 1. Based on the primary cohort (N=349,312), for each participant, data on prescriptions by the physician  
18 who prescribed the participant the acid suppression therapy at T0 was collected from 6 months before  
19 the participant's T0 till T0.  
20  
21

22  
23  
24 2. For each participant, the percentage of PPIs prescribed to new acid suppression therapy users by their  
25 prescribing physician, excluding the prescription of the participant, in the 6 months prior to and  
26 including T0 was computed and used as an instrumental variable. Participants whose prescribing  
27 physician did not prescribe any other acid suppression therapy to new users in the 6 months prior to and  
28 including T0 were excluded from the analysis.  
29  
30  
31

32  
33  
34 3. In order to predict the participants' possibility of receiving PPI, instrumental variable and co-variables  
35 were used in a logistic regression model where the outcome was acid suppression therapy prescription  
36 at T0.  
37  
38  
39

40  
41  
42 4. Residual terms were computed as the difference between participants' real probability ( 1 if PPI, 0 if  
43 H2 blocker) and predicted probability.  
44  
45  
46

47  
48  
49 5. Multivariate Cox regression, which included the residual term and co-variables, were conducted to  
50 evaluate the relationship between PPI and death. Patients in the control group who received PPI later  
51 were censored at the time they received PPI.  
52  
53  
54  
55  
56  
57  
58  
59  
60

## STROBE Statement—checklist of items that should be included in reports of observational studies

|                           | Item No | Recommendation                                                                                                                                                                                                                                                                                                                                                                                                                                                         | Reported Page                                               |
|---------------------------|---------|------------------------------------------------------------------------------------------------------------------------------------------------------------------------------------------------------------------------------------------------------------------------------------------------------------------------------------------------------------------------------------------------------------------------------------------------------------------------|-------------------------------------------------------------|
| <b>Title and abstract</b> | 1       | (a) Indicate the study's design with a commonly used term in the title or the abstract                                                                                                                                                                                                                                                                                                                                                                                 | 1                                                           |
|                           |         | (b) Provide in the abstract an informative and balanced summary of what was done and what was found                                                                                                                                                                                                                                                                                                                                                                    | 2                                                           |
| <b>Introduction</b>       |         |                                                                                                                                                                                                                                                                                                                                                                                                                                                                        |                                                             |
| Background/rationale      | 2       | Explain the scientific background and rationale for the investigation being reported                                                                                                                                                                                                                                                                                                                                                                                   | 3                                                           |
| Objectives                | 3       | State specific objectives, including any prespecified hypotheses                                                                                                                                                                                                                                                                                                                                                                                                       | 3-4                                                         |
| <b>Methods</b>            |         |                                                                                                                                                                                                                                                                                                                                                                                                                                                                        |                                                             |
| Study design              | 4       | Present key elements of study design early in the paper                                                                                                                                                                                                                                                                                                                                                                                                                | 4                                                           |
| Setting                   | 5       | Describe the setting, locations, and relevant dates, including periods of recruitment, exposure, follow-up, and data collection                                                                                                                                                                                                                                                                                                                                        | 4                                                           |
| Participants              | 6       | (a) <i>Cohort study</i> —Give the eligibility criteria, and the sources and methods of selection of participants. Describe methods of follow-up<br><i>Case-control study</i> —Give the eligibility criteria, and the sources and methods of case ascertainment and control selection. Give the rationale for the choice of cases and controls<br><i>Cross-sectional study</i> —Give the eligibility criteria, and the sources and methods of selection of participants | 4-5                                                         |
|                           |         | (b) <i>Cohort study</i> —For matched studies, give matching criteria and number of exposed and unexposed<br><i>Case-control study</i> —For matched studies, give matching criteria and the number of controls per case                                                                                                                                                                                                                                                 | Additional matched cohort described in Supplemental methods |
| Variables                 | 7       | Clearly define all outcomes, exposures, predictors, potential confounders, and effect modifiers. Give diagnostic criteria, if applicable                                                                                                                                                                                                                                                                                                                               | 5-6                                                         |
| Data sources/measurement  | 8*      | For each variable of interest, give sources of data and details of methods of assessment (measurement). Describe comparability of assessment methods if there is more than one group                                                                                                                                                                                                                                                                                   | 5-6                                                         |
| Bias                      | 9       | Describe any efforts to address potential sources of bias                                                                                                                                                                                                                                                                                                                                                                                                              | 7                                                           |
| Study size                | 10      | Explain how the study size was arrived at                                                                                                                                                                                                                                                                                                                                                                                                                              | 4                                                           |
| Quantitative variables    | 11      | Explain how quantitative variables were handled in the analyses. If applicable, describe which groupings were chosen and why                                                                                                                                                                                                                                                                                                                                           | 6                                                           |
| Statistical methods       | 12      | (a) Describe all statistical methods, including those used to control for confounding                                                                                                                                                                                                                                                                                                                                                                                  | 6-7 and Supplemental methods                                |
|                           |         | (b) Describe any methods used to examine subgroups and interactions                                                                                                                                                                                                                                                                                                                                                                                                    | 6                                                           |
|                           |         | (c) Explain how missing data were addressed                                                                                                                                                                                                                                                                                                                                                                                                                            | 7                                                           |
|                           |         | (d) <i>Cohort study</i> —If applicable, explain how loss to follow-up was addressed<br><i>Case-control study</i> —If applicable, explain how matching of cases and controls was addressed                                                                                                                                                                                                                                                                              | Due to the feature of VA data on death                      |

|  |  |                                                                                                              |                                                                                                                   |
|--|--|--------------------------------------------------------------------------------------------------------------|-------------------------------------------------------------------------------------------------------------------|
|  |  | <i>Cross-sectional study</i> —If applicable, describe analytical methods taking account of sampling strategy | information, no loss of follow-up would occur. All death data is captured by the Veterans Benefit Administration. |
|  |  | (e) Describe any sensitivity analyses                                                                        | 7-8                                                                                                               |

| Results                  |     |                                                                                                                                                                                                              | Reported Page            |
|--------------------------|-----|--------------------------------------------------------------------------------------------------------------------------------------------------------------------------------------------------------------|--------------------------|
| Participants             | 13* | (a) Report numbers of individuals at each stage of study—eg numbers potentially eligible, examined for eligibility, confirmed eligible, included in the study, completing follow-up, and analysed            | 4-5                      |
|                          |     | (b) Give reasons for non-participation at each stage                                                                                                                                                         | N/A                      |
|                          |     | (c) Consider use of a flow diagram                                                                                                                                                                           | N/A                      |
| Descriptive data         | 14* | (a) Give characteristics of study participants (eg demographic, clinical, social) and information on exposures and potential confounders                                                                     | 19-20<br>Table 1         |
|                          |     | (b) Indicate number of participants with missing data for each variable of interest                                                                                                                          | see page 7<br>for reason |
|                          |     | (c) <i>Cohort study</i> —Summarise follow-up time (eg, average and total amount)                                                                                                                             | 20 Table 1               |
| Outcome data             | 15* | <i>Cohort study</i> —Report numbers of outcome events or summary measures over time                                                                                                                          | 19 Table 1               |
|                          |     | <i>Case-control study</i> —Report numbers in each exposure category, or summary measures of exposure                                                                                                         | N/A                      |
|                          |     | <i>Cross-sectional study</i> —Report numbers of outcome events or summary measures                                                                                                                           | N/A                      |
| Main results             | 16  | (a) Give unadjusted estimates and, if applicable, confounder-adjusted estimates and their precision (eg, 95% confidence interval). Make clear which confounders were adjusted for and why they were included | 21-22<br>Table 2         |
|                          |     | (b) Report category boundaries when continuous variables were categorized                                                                                                                                    | N/A                      |
|                          |     | (c) If relevant, consider translating estimates of relative risk into absolute risk for a meaningful time period                                                                                             | N/A                      |
| Other analyses           | 17  | Report other analyses done—eg analyses of subgroups and interactions, and sensitivity analyses                                                                                                               | 9-10                     |
| <b>Discussion</b>        |     |                                                                                                                                                                                                              |                          |
| Key results              | 18  | Summarise key results with reference to study objectives                                                                                                                                                     | 12                       |
| Limitations              | 19  | Discuss limitations of the study, taking into account sources of potential bias or imprecision. Discuss both direction and magnitude of any potential bias                                                   | 13                       |
| Interpretation           | 20  | Give a cautious overall interpretation of results considering objectives, limitations, multiplicity of analyses, results from similar studies, and other relevant evidence                                   | 12-13                    |
| Generalisability         | 21  | Discuss the generalisability (external validity) of the study results                                                                                                                                        | 12                       |
| <b>Other information</b> |     |                                                                                                                                                                                                              |                          |
| Funding                  | 22  | Give the source of funding and the role of the funders for the present study and, if                                                                                                                         | 15                       |

|  |  |                                                                          |  |
|--|--|--------------------------------------------------------------------------|--|
|  |  | applicable, for the original study on which the present article is based |  |
|--|--|--------------------------------------------------------------------------|--|

\*Give information separately for cases and controls in case-control studies and, if applicable, for exposed and unexposed groups in cohort and cross-sectional studies.

**Note:** An Explanation and Elaboration article discusses each checklist item and gives methodological background and published examples of transparent reporting. The STROBE checklist is best used in conjunction with this article (freely available on the Web sites of PLoS Medicine at <http://www.plosmedicine.org/>, Annals of Internal Medicine at <http://www.annals.org/>, and Epidemiology at <http://www.epidem.com/>). Information on the STROBE Initiative is available at [www.strobe-statement.org](http://www.strobe-statement.org).

For peer review only

# BMJ Open

## Excess Risk of Death among Users of Proton Pump Inhibitors: A longitudinal observational cohort study of United States Veterans

|                                 |                                                                                                                                                                                                                                                                                                                                                                                                                                                                                                                                                                                                                                                                                                                                                                                                                    |
|---------------------------------|--------------------------------------------------------------------------------------------------------------------------------------------------------------------------------------------------------------------------------------------------------------------------------------------------------------------------------------------------------------------------------------------------------------------------------------------------------------------------------------------------------------------------------------------------------------------------------------------------------------------------------------------------------------------------------------------------------------------------------------------------------------------------------------------------------------------|
| Journal:                        | <i>BMJ Open</i>                                                                                                                                                                                                                                                                                                                                                                                                                                                                                                                                                                                                                                                                                                                                                                                                    |
| Manuscript ID                   | bmjopen-2016-015735.R1                                                                                                                                                                                                                                                                                                                                                                                                                                                                                                                                                                                                                                                                                                                                                                                             |
| Article Type:                   | Research                                                                                                                                                                                                                                                                                                                                                                                                                                                                                                                                                                                                                                                                                                                                                                                                           |
| Date Submitted by the Author:   | 07-Mar-2017                                                                                                                                                                                                                                                                                                                                                                                                                                                                                                                                                                                                                                                                                                                                                                                                        |
| Complete List of Authors:       | Xie, Yan; VA Saint Louis Health Care System, Clinical Epidemiology Center<br>Bowe, Benjamin; VA Saint Louis Health Care System, Clinical Epidemiology Center<br>Li, Tingting; VA Saint Louis Health Care System, Clinical Epidemiology Center; Washington University in Saint Louis School of Medicine, Internal Medicine<br>Xian, Hong; VA Saint Louis Health Care System, Clinical Epidemiology Center; Saint Louis University, School of Public Health, Department of Biostatistics<br>Yan, Yan; VA Saint Louis Health Care System, Clinical Epidemiology Center; Washington University in Saint Louis School of Medicine, Public Health Sciences<br>Al-Aly, Ziyad; VA Saint Louis Health Care System, Clinical Epidemiology Center; Washington University in Saint Louis School of Medicine, Internal Medicine |
| <b>Primary Subject Heading</b>: | Public health                                                                                                                                                                                                                                                                                                                                                                                                                                                                                                                                                                                                                                                                                                                                                                                                      |
| Secondary Subject Heading:      | Epidemiology, Pharmacology and therapeutics, Public health, Gastroenterology and hepatology                                                                                                                                                                                                                                                                                                                                                                                                                                                                                                                                                                                                                                                                                                                        |
| Keywords:                       | CLINICAL PHARMACOLOGY, EPIDEMIOLOGY, Gastroduodenal disease < GASTROENTEROLOGY, Health & safety < HEALTH SERVICES ADMINISTRATION & MANAGEMENT, PUBLIC HEALTH, Adverse events < THERAPEUTICS                                                                                                                                                                                                                                                                                                                                                                                                                                                                                                                                                                                                                        |
|                                 |                                                                                                                                                                                                                                                                                                                                                                                                                                                                                                                                                                                                                                                                                                                                                                                                                    |

SCHOLARONE™  
Manuscripts

**Excess Risk of Death among Users of Proton Pump Inhibitors:  
A longitudinal observational cohort study of United States Veterans**

**Yan Xie MPH<sup>1</sup>, Benjamin Bowe MPH<sup>1</sup>, Tingting Li MD<sup>1,2</sup>, Hong Xian PhD<sup>1,3</sup>, Yan Yan MD, PhD<sup>1,4</sup>,  
and Ziyad Al-Aly MD<sup>1,2,5,6</sup>**

<sup>1</sup>Clinical Epidemiology Center, Research and Education Service, VA Saint Louis Health Care System,  
Saint Louis, Missouri

<sup>2</sup>Department of Medicine, Washington University School of Medicine, Saint Louis, Missouri

<sup>3</sup>Department of Biostatistics, College for Public Health and Social Justice, Saint Louis University,  
Saint Louis, Missouri

<sup>4</sup>Division of Public Health Sciences, Department of Surgery, Washington University School of Medicine,  
Saint Louis, Missouri

<sup>5</sup>Renal Section, Medicine Service, VA Saint Louis Health Care System,  
Saint Louis, Missouri

<sup>6</sup>Institute for Public Health, Washington University School of Medicine, Saint Louis, Missouri

**Running title: PPI and mortality**

**Word count for abstract: 283**

**Word count for text: 3705**

**Corresponding Author:**

Ziyad Al-Aly, M.D.  
Clinical Epidemiology Center  
VA Saint Louis Health Care System  
915 North Grand Boulevard, 151-JC  
Saint Louis, MO 63106  
Telephone: (314) 289-6333  
E-mail: [zalaly@gmail.com](mailto:zalaly@gmail.com)

**Abstract:**

**Objective:** Proton pump inhibitors (PPI) are widely used; and their use is associated with increased risk of adverse events. However, whether PPI use is associated with excess risk of death is unknown. We aimed to examine the association between PPI use and risk of all-cause mortality.

**Design:** Longitudinal observational cohort study

**Setting:** US Department of Veterans Affairs

**Participants:** Primary cohort of new users of PPI or Histamine H2 receptor antagonists (H2 blockers) (N=349,312); additional cohorts included PPI versus no PPI (N=3,288,092), and PPI versus no PPI and no H2 blockers (N=2,887,030).

**Main outcome measures:** Risk of death.

**Results:** Over a median follow-up of 5.71 years (IQR: 5.11-6.37), PPI use was associated with increased risk of death compared to H2 blockers use (HR=1.25; CI=1.23-1.28). Risk of death associated with PPI use was higher in analyses adjusted for high-dimensional propensity score (HR=1.16; CI=1.13-1.18); two-stage residual inclusion estimation (HR=1.21; CI=1.16-1.26); and in 1:1 time-dependent propensity score matched cohort (HR=1.34 CI=1.29-1.39). The risk of death was increased when considering PPI use versus no PPI (HR=1.15; CI=1.14-1.15), and PPI use versus no PPI and no H2 blockers (HR= 1.23; CI=1.22-1.24). Risk of death associated with PPI use was increased among participants without gastrointestinal conditions: PPI versus H2 blockers (HR=1.24; CI=1.21-1.27); PPI use versus no PPI (HR=1.19; CI=1.18-1.20); and PPI use versus no PPI and no H2 blockers (HR=1.22; CI=1.21-1.23). Among new PPI users, there was a graded association between duration of exposure and risk of death.

**Conclusions:** The results suggest excess risk of death among PPI users; risk is also increased among those without gastrointestinal conditions and with prolonged duration of use. Limiting PPI use and duration to instances where it is medically indicated may be warranted.

**Strength and limitations:**

- National large scale data from a network of integrated health systems
- Employed a new user design and developed a number of analytical approaches where we consistently found a significant association between PPI exposure and risk of death.
- Cohort included mostly older white male US Veterans which may limit the generalizability.
- Did not include information on the cause of death.

**Introduction:**

Proton pump inhibitors (PPI) are widely prescribed and are also available for sale over the counter without prescription in several countries(1, 2). Several observational studies suggest that PPI use is associated with increased risk of a number of adverse health outcomes(1). A number of studies have shown that PPI use is associated with significant risk of acute interstitial nephritis(3-5). Recent studies established an association between exposure to PPI and risk of chronic kidney disease (CKD), kidney disease progression, and end stage renal disease (ESRD)(2, 6, 7). Results from a large prospective observational German cohort suggest that patients receiving PPI had a higher risk of incident dementia(8). Several reports highlighted a rare but potentially fatal risk of hypomagnesemia among users of PPI(9-11). PPI use has been associated with increased risk of both incident and recurrent *Clostridium difficile* infections(12). Several observational analyses have shown that PPI use was also associated with increased risk of osteoporotic fractures including hip and spine fractures(13, 14). Less convincing -and to some extent inconsistent- evidence suggests a relationship between PPI use and risks of community acquired pneumonia and cardiovascular events(15-17). Emerging - and far from conclusive- *in vitro* evidence suggests that PPI results in inhibition of lysosomal acidification and impairment of proteostasis leading to increased oxidative stress, endothelial dysfunction, telomere shortening and accelerated senescence in human endothelial cells(18). The experimental work provides a putative mechanistic link to explain some of the adverse events associated with PPI use(18).

The adverse outcomes associated with PPI use are serious and each is independently associated with higher risk of mortality. Evidence from several small cohort studies of older adults who were recently discharged from the hospital, or institutionalized in long term care facilities suggests inconsistently that PPI use may be associated with increased risk of 1-year mortality(19-22). Whether PPI use is associated with excess risk of



1 death is not known and has not been examined in large epidemiologic studies spanning a sufficiently long  
2 duration of follow up. We hypothesized that owing to the consistently observed associations between PPI use  
3 and risk of adverse health outcomes, PPI use is associated with excess risk of death, and that the risk of death  
4 would be more pronounced with increased duration of use. We therefore used the Department of Veterans  
5 Affairs national databases to build a longitudinal cohort of incident users of acid suppression therapy including  
6 PPI and Histamine H2 receptor antagonists (H2 blockers) to examine the association between PPI use and risk  
7 of all-cause mortality, and to determine whether risk of death is increased with prolonged duration of use.  
8  
9  
10  
11  
12  
13  
14  
15  
16  
17

## 18 **Methods:**

### 19 **Cohort participants:**

#### 20 **Primary cohort:**

21  
22 Using administrative data from the United States Department of Veterans Affairs (VA), we identified patients  
23 who received an outpatient H2 blockers or PPI prescription between October 01, 2006 and September 30,  
24 2008 (n=1,762,908). In order to select new users of acid suppression therapy (incident user design), we  
25 excluded 1,356,948 patients who received any outpatient H2 blockers or PPI prescriptions between October 01,  
26 1998 and September 30, 2006. To account for patients' kidney function, only patients with at least one  
27 outpatient serum creatinine value before first acid suppression therapy prescription were selected in the cohort,  
28 yielding an analytic cohort of 349,312 patients. Patients whose first acid suppression therapy was PPI  
29 (n=275,977) were considered to be in the PPI group during follow-up. Patients who received H2 blockers as  
30 their first acid suppression therapy (n=73,335) served as the reference group before they received any PPI  
31 prescription. (Supplemental figure 1) Within the reference group, those who received a PPI prescription later  
32 (n=33,136) were considered to be in the PPI group from the date of their first PPI prescription until the end of  
33 follow-up(23). Time zero (T0) for primary cohort was defined as first acid suppression therapy prescription date.  
34  
35  
36  
37  
38  
39  
40  
41  
42  
43  
44  
45  
46  
47  
48  
49  
50  
51

#### 52 **Secondary cohorts:**

53  
54 We additionally built two secondary cohorts to examine the association of PPI use and risk of death in a) PPI  
55 versus no PPI users, and b) PPI versus non users of acid suppression therapy. Patients with no PPI  
56 prescription between October 01, 1998 and September 30, 2006, and with at least one outpatient eGFR value  
57  
58  
59  
60

1 before October 01, 2006 were selected to evaluate the risk of death associated with PPI use versus no PPI  
2 use (n=3,288,092) (Supplemental figure 2a). Patients with no PPI prescription between October 01, 1998 and  
3 September 30, 2006, with no H2 blockers before first PPI prescription and at least one outpatient eGFR value  
4 before October 01, 2006 were selected to evaluate the risk of death associated with PPI use versus no acid  
5 suppression therapy (n=2,887,030) (Supplemental figure 2b). T0 for secondary cohorts was defined as  
6 October 01, 2006.  
7  
8  
9  
10  
11  
12

13  
14  
15 Patients in both primary and secondary cohorts were followed until September 30, 2013 or death. The study  
16 was approved by the Institutional Review Board of the VA Saint Louis Health Care System, Saint Louis, MO.  
17  
18  
19

### 20 21 22 **Data Sources:**

23  
24 We used the Department of Veterans Affairs databases including inpatient and outpatient medical SAS  
25 datasets (that include utilization data related to all inpatient and outpatient encounters within the VA system) to  
26 ascertain detailed patient demographic characteristics and comorbidity information based on inpatient and  
27 outpatient encounters(2, 24). The VA Managerial Cost Accounting System Laboratory Results (a  
28 comprehensive database that includes VA-wide results for selected laboratory tests obtained in the clinical  
29 setting) provided information on outpatient and inpatient laboratory results. The VA Corporate Data Warehouse  
30 Production Outpatient Pharmacy domain provided information on outpatient prescriptions. The VA Vital Status  
31 and Beneficiary Identification Records Locator Subsystem (BIRLS) files provided demographic characteristics  
32 and death.  
33  
34  
35  
36  
37  
38  
39  
40  
41  
42  
43  
44  
45

46 **Primary Predictor Variable:** PPI use was the primary predictor. Once cohort participants received PPI  
47 prescription, they were considered with effect of PPI until the end of follow up. Medications that contain  
48 esomeprazole, lansoprazole, omeprazole, pantoprazole or rabeprazole were counted as PPI. Medications  
49 including ranitidine, cimetidine, and famotidine were counted as H2 blockers.  
50  
51  
52  
53  
54  
55

56 **Outcome:** The primary outcome in survival analyses was time to death. Death information is routinely  
57 collected by the Veterans Benefit Administration for all United States Veterans.  
58  
59  
60

**Covariates:**

Covariates included age, race, gender, eGFR, number of outpatient serum creatinine measurements, number of hospitalizations, diabetes mellitus, hypertension, cardiovascular disease, peripheral artery disease, cerebrovascular disease, chronic lung disease, cancer, hepatitis C, HIV, dementia and diseases associated with acid suppression therapy use such as gastroesophageal reflux disease (GERD), upper gastrointestinal (GI) tract bleeding, ulcer disease, H. Pylori infection, Barrett's esophagus, achalasia, stricture and esophageal adenocarcinoma(25-28). eGFR was calculated using the abbreviated four-variable Chronic Kidney Disease Epidemiology Collaboration equation based on age, sex, race, and outpatient serum creatinine(29). Race/ethnicity was categorized as white, black, or other (Latino, Asian, Native American, or other racial/ethnic minority groups). Comorbidities except for hepatitis C and HIV were assigned on the basis of relevant ICD-9-CM diagnostic and procedures codes and CPT codes in the VA Medical SAS datasets(2, 30-33). Hepatitis C and HIV were assigned based on laboratory results.

Baseline covariates were ascertained from October 01, 1998 till T0. All covariates except for age, race and gender covariates values were treated as time-varying covariates where they were additionally assessed until date of first PPI prescription in those patients who did not have PPI prescription at T0. Any comorbidity occurring during the assessment period was considered present during the remaining follow-up. eGFR was the outpatient eGFR value within and most proximate to the end of the assessment period. Number of outpatient serum creatinine measurements and number of hospitalizations were accumulated during the assessment period.

**Statistical Analysis:**

Means, standard deviations and t-tests are presented for normally distributed continuous variables; medians, interquartile ranges and Wilcoxon-Mann-Whitney tests are presented for non-normally distributed continuous variables; counts, percentages and Chi-square tests are presented for categorical variables. Incident rates per 100 person-years were computed for death and confidence intervals were estimated based on the normal distribution. Simon and Makuch method for survival curves was used for time-dependent covariates(34).

1  
2 Cox regression models with time-dependent covariates were used in the assessment of the association  
3  
4 between PPI exposure and risk of death where patients could switch from H2 blockers to PPI in the models. In  
5  
6 order to account for potential delayed effect of PPI, patients were considered to have the effect of PPI from the  
7  
8 first PPI prescription till end of follow up. In addition, time dependent Cox models were conducted in subgroups  
9  
10 where patients had no GI conditions, and where patients had no GI conditions except for GERD.  
11  
12  
13

14  
15 Because exposure in this observational cohort is time-dependent, we undertook 1:1 propensity score matching  
16  
17 for the primary cohort where time-dependent propensity scores were calculated based on time-dependent Cox  
18  
19 regression with all covariates(35)(details are provided in supplemental methods). After matching, all covariates  
20  
21 except for age had an absolute standardized difference of less than 0.1, which indicated all covariates except  
22  
23 for age were well balanced. Age had a standardized difference equal to 0.13. Doubly robust estimation was  
24  
25 applied after matching, where all covariates were additionally controlled for in the model, to obtain an unbiased  
26  
27 effect estimator(36).  
28  
29  
30

31  
32 In order to optimize control of confounding, we additionally built high-dimensional propensity score adjusted  
33  
34 survival models following the multistep algorithm described by Schneeweiss et al(37)(details are provided in  
35  
36 supplemental methods). We also applied two-stage residual inclusion estimation based on instrumental  
37  
38 variable approach (Supplemental methods)(38).  
39  
40  
41

42  
43 In addition, we evaluated the association between duration of PPI prescription and risk of death among new  
44  
45 users of PPI. Duration was defined in cumulative days of use and categorized as  $\leq 30$ , 31-90, 91-180, 181-360,  
46  
47 361-720, where  $\leq 30$  days considered as the reference group. To avoid immortal time bias (by definition, cohort  
48  
49 participants must be alive to receive prescription hence introducing a bias commonly referred to as immortal  
50  
51 time bias), time of cohort entry was defined as the date of last PPI prescription plus days' supply (39, 40). In  
52  
53 order to ensure sufficient length of follow up time following T0, we excluded cohort participants with cumulative  
54  
55 duration of exposure exceeding 720 days (because of limited overall cohort timeline, and because T0 starts at  
56  
57 the end of last prescription, those with long exposure will necessarily have limited follow up time). In  
58  
59  
60

1 regression analyses, a 95% confidence interval (CI) of a hazard ratio (HR) that does not include unity was  
2 considered statistically significant. All analyses were performed using SAS Enterprise Guide version 7.1.  
3  
4  
5

### 6 **Sensitivity Analysis:**

7  
8 In order to further evaluate the consistency and robustness of study findings, we examined the observed  
9 associations in a less contemporary cohort (dating back to an era where PPI prescription and use were far less  
10 frequent) of patients without acid suppression therapy prescriptions between October 01, 1998 and September  
11 30, 2000 (washout period) and with acid suppression therapy prescription between October 01, 2000 and  
12 September 30, 2002 and at least one outpatient serum creatinine value before that. Patients in this cohort were  
13 followed till September 30, 2007 or death. To examine the impact of potential residual confounding on study  
14 results, we conducted additional sensitivity analyses as described by Schneeweiss(41): a) we used the rule-out  
15 approach to identify the strength of the residual confounding that could fully explain the association observed in  
16 primary analyses; and b) applied an external adjustment approach using external information (prevalence and  
17 risk estimates from published literature) to evaluate potential net confounding bias due to unmeasured  
18 confounders(2, 41-44). Methods are described elegantly by Schneeweiss(41). In addition, to remove death  
19 events that were less likely to be related to PPI exposure, we excluded cohort participants who died within 90  
20 days after first PPI or H2 blockers prescription.  
21  
22  
23  
24  
25  
26  
27  
28  
29  
30  
31  
32  
33  
34  
35  
36  
37  
38

39 We conducted additional sensitivity analyses which included hemoglobin as a covariate in cohort participants  
40 with available data. We also undertook analyses which stratified the cohort based on cardiovascular disease,  
41 history of pneumonia, chronic kidney disease (eGFR<60 and  $\geq 60$  mL/min/1.73m<sup>2</sup>) or age (<65 and  $\geq 65$  years  
42 old) at T0. Finally, and in order to ascertain the specificity of the findings, we examined the association  
43 between PPI exposure and the risk of a motor vehicle accident as a tracer outcome where a priori knowledge  
44 suggests an association is not likely to exist.  
45  
46  
47  
48  
49  
50  
51  
52  
53

### 54 **Patient involvement:**

55 No patients were involved in developing the hypothesis, the specific aims, or the research questions, nor were  
56 they involved in developing plans for design or implementation of the study. No patients were involved in the  
57  
58  
59  
60

1 interpretation of study results, or write up of the manuscript. There are no plans to disseminate the results of  
2 the research to study participants or the relevant patient community.  
3  
4  
5

## 6 **Results:**

7  
8 The demographic and health characteristics of the overall primary cohort of new users of acid suppression  
9 therapy (n=349,312), by type of acid suppressant drug at time of cohort entry (H2 blockers n=73,335; PPI  
10 n=275,977), and those who were ever exposed to PPI (n=309,113) are provided in table 1. There were  
11 significant baseline differences in that cohort participants who were treated with PPI were older, and were  
12 more likely to have comorbid conditions including diabetes, hypertension, cardiovascular disease, and  
13 hyperlipidemia. Cohort participants treated with PPI were also more likely to have upper gastrointestinal tract  
14 bleeding, ulcer disease, H. Pylori infection, Barrett's esophagus, achalasia, stricture and esophageal  
15 adenocarcinoma (table 1). Survival curves for PPI and H2 blockers were presented in figure 1.  
16  
17  
18  
19  
20  
21  
22  
23  
24  
25  
26  
27  
28

## 29 **Association between PPI use and risk of death:**

30  
31 Among new users of acid suppression therapy (N=349,312), and over a median follow up of 5.71 years (IQR:  
32 5.11 – 6.37), where exposure was treated as time-dependent covariate; PPI use was associated with  
33 increased risk of death compared to H2 blockers use (HR=1.25; CI=1.23-1.28) (table 2). Among new users of  
34 acid suppression therapy (N=349,312); in high-dimensional propensity score adjusted models, new PPI users  
35 had increased risk of death compared to new users of H2 blockers (HR=1.16; CI=1.13-1.18); based on two-  
36 stage residual inclusion estimation, risk of death was higher in new users PPI when compared to new users of  
37 H2 blockers (HR=1.21; CI=1.16-1.26). In a 1:1 time-dependent propensity score matched cohort of new users  
38 of PPI and H2 blockers (N=146,670), PPI users had significantly increased risk of death (HR=1.34; CI=1.29-  
39 1.39).  
40  
41  
42  
43  
44  
45  
46  
47  
48  
49  
50  
51  
52

53 We examined the relationship of PPI and risk of death in secondary cohorts (as described in methods) where  
54 we considered risk associated with PPI use versus no known exposure to PPI (no PPI use +/- H2 blockers  
55 use) (N=3,288,092); the results suggest that PPI use was associated with increased risk of death (HR=1.15;  
56 CI=1.14-1.15) (table 2). Assessment of risk of death associated with PPI use versus no known exposure to any  
57  
58  
59  
60

1 acid suppression therapy (no PPI use and no H2 blockers use) (N=2,887,070), suggests increased risk of  
2 death with PPI use (HR= 1.23; CI=1.22-1.24).  
3  
4  
5  
6

### 7 **Association between PPI use and risk of death in those without gastrointestinal conditions:**

8  
9 We then analyzed the association between PPI use and the risk of death in cohort where we excluded  
10 participants with documented medical conditions generally considered as indications for treatment with PPI  
11 including GERD, upper gastrointestinal tract bleeding, ulcer disease, H. Pylori infection, Barrett's esophagus,  
12 achalasia, stricture and esophageal adenocarcinoma. The intent of this analysis was to examine the putative  
13 association of PPI use and risk of death in a lower risk cohort. Examination of risk of death associated with use  
14 of acid suppression therapy (PPI vs. H2 blockers) suggests that risk of death was increased with PPI use  
15 (HR=1.24; CI=1.21-1.27) (table 2). Examination of the risk of death associated with PPI use versus no known  
16 exposure to PPI (no PPI use +/- H2 blockers use) suggests a higher risk of death associated with PPI use  
17 (HR=1.19; CI=1.18, 1.20). Results were consistent where we examined risk of death associated with PPI use  
18 versus no known exposure to any acid suppression therapy (no PPI use and no H2 blockers use) (HR=1.22;  
19 CI=1.21-1.23). Risk of death associated with PPI use in cohort participants without GI conditions but included  
20 participants with GERD yielded consistent results (PPI vs H2 blockers (HR=1.24; CI=1.21-1.27); PPI vs no PPI  
21 (HR=1.14; CI=1.13-1.14); PPI vs no PPI and no H2 blockers (HR=1.22; CI=1.21-1.22) (table 2).  
22  
23  
24  
25  
26  
27  
28  
29  
30  
31  
32  
33  
34  
35  
36  
37  
38  
39

### 40 **Duration of exposure and excess risk of death:**

41  
42 We examined the association between duration of PPI exposure and risk of death among new users of PPI  
43 (n=166,098). Compared to those exposed for  $\leq 30$  days, there was a graded association between duration of  
44 exposure and risk of death among those exposed for 31-90, 91-180, 181-360, and 361-720 days (table 3,  
45 figure 2).  
46  
47  
48  
49  
50  
51  
52

### 53 **Sensitivity analyses:**

54  
55 We tested the robustness of study results in sensitivity analyses where we built a less contemporary cohort as  
56 described in methods; demographic and health characteristics of this cohort are provided in supplemental table  
57  
58  
59  
60



1 1. Where exposure was treated as time-dependent, PPI use was associated with increased risk of death  
2 compared to H2 blockers use (HR=1.17; CI=1.15-1.19). In a 1:1 time-dependent propensity score matched  
3 cohort of PPI and H2 blockers, PPI users had significantly increased risk of death HR=1.21 (1.19-1.24).  
4  
5 Furthermore, we also observed a graded association between cumulative duration of exposure to PPI and risk  
6  
7 of death (supplemental table 2, supplemental figure 3).  
8  
9

10  
11  
12 To examine the potential impact of residual confounding on study results, we used rule-out and external  
13 adjustment approaches as described by Schneeweiss(41). Using the rule-out approach, we characterized a set  
14 of parameters (OR for relationship of PPI and confounder), and (HR for relationship of confounder and death)  
15 with sufficient strength to fully explain the association observed in primary analyses (supplemental figure 4).  
16  
17 For example, if the confounder was twice as likely among PPI users (OR=2), and the HR of death associated  
18 with the uncontrolled confounder exceeded 4.0, then the uncontrolled confounder would fully explain the  
19 observed association between PPI and death (supplemental figure 4). Given that our analyses accounted for  
20 most known strong independent risk factors of death, and employed an active comparator group; to cancel the  
21 results, any uncontrolled confounder of the required prevalence (OR=2 or more in the example above), and  
22 strength (HR=4 or more in the example above) would also have to be independent of the confounders already  
23 adjusted for and is unlikely to exist; thus the results cannot be fully explained by this putative uncontrolled  
24  
25  
26  
27  
28  
29  
30  
31  
32  
33  
34  
35  
36  
37  
38  
39  
40  
41  
42  
43  
44  
45  
46  
47  
48  
49  
50  
51  
52  
53  
54  
55  
56  
57  
58  
59  
60

External adjustment to estimate the impact of 3 unmeasured confounders including obesity, smoking, and use  
of therapeutics including anticoagulants, antiplatelet agents, and non-steroidal anti-inflammatory drugs shows  
a net confounding bias of 9.66% (supplemental figure 5). The total bias could move a null association between  
PPI and death from HR=1.00 to HR=1.10 (reflecting the net positive bias of 9.66% rounded up to 10.0%). The  
association we observed between PPI and death was 1.25>1.10, which cannot be fully due to bias of  
unmeasured confounding.

The association between PPI and death remained significant after excluding cohort participants who died  
within 90 days after first PPI or H2 blockers prescription (HR=1.23; CI=1.20, 1.26), or additionally controlling for

1 hemoglobin levels (HR=1.25; CI=1.23, 1.28). In models stratified for the presence of cardiovascular disease,  
2 history of pneumonia, chronic kidney disease, and age at T0; there was increased risk of death associated with  
3 PPI use in those with and without cardiovascular disease (HR=1.19; CI=1.15, 1.23, and HR=1.30; CI=1.27,  
4 1.34; respectively); with and without history of pneumonia (HR=1.39; CI=1.32, 1.45, and HR=1.21; CI=1.18,  
5 1.24; respectively); with and without chronic kidney disease (HR=1.18; CI=1.14, 1.22, and HR=1.29; CI=1.26,  
6 1.33; respectively); and above and below age 65 (HR=1.17; CI=1.13, 1.20, and HR=1.44; CI=1.39, 1.50;  
7 respectively). As a test of specificity, among users of acid suppression therapy, PPI use was not associated  
8 with increased risk of the tracer outcome of a motor vehicle accident (HR=0.99; CI= 0.89, 1.10).  
9  
10  
11  
12  
13  
14  
15  
16  
17  
18  
19

## 20 Discussion:

21 This study provides insights into the excess risk of death associated with PPI use. In a large primary cohort of  
22 new users of acid suppression therapy followed for a median of 5.71 years, we show a significant association  
23 between PPI use and risk of all-cause mortality, risk was increased among those with no documented medical  
24 indications for PPI use, and with prolonged duration of use. The results were consistent in multiple analyses  
25 and robust to changes in epidemiologic design and statistical specifications, and were reproduced in an earlier  
26 and less contemporary cohort from an era where PPI use was far less frequent (45).  
27  
28  
29  
30  
31  
32  
33  
34  
35  
36

37 PPI are widely used by millions of people for indications and durations that were never tested or approved;  
38 they are available over the counter (without prescription) in several countries, and generally perceived as safe  
39 class of therapeutics; they are often overprescribed, rarely deprescribed, frequently started inappropriately  
40 during a hospital stay, and their use extended for long term duration without appropriate medical indication (46-  
41 50). Results of nationally representative data from the National Health and Nutrition Examination Survey,  
42 where analyses were weighted to represent the US adult population, showed that the use of prescription PPI  
43 increased from 3.9% to 7.8% from 1999-2000 to 2011-2012, representing a doubling of prevalence ratio(45).  
44  
45  
46  
47  
48  
49  
50  
51  
52  
53  
54  
55  
56  
57  
58  
59  
60

1 deter prescription and use of PPI where medically indicated, they may be used to encourage and promote  
2 pharmacovigilance and emphasize the need to exercise judicious use of PPI and limit use and duration of  
3 therapy to instances where there is a clear medical indication and where benefit outweighs potential risk(1).  
4 Standardized guidelines for initiating PPI prescription may lead to reduced overuse(54), regular review of  
5 prescription and over the counter medications, and deprescription where a medical indication for PPI treatment  
6 ceases to exist may be a meritorious approach(52).  
7  
8  
9  
10  
11  
12  
13  
14

15 The biologic mechanism underpinning the association of PPI use and risk of death is not clear. Experimental  
16 evidence in rats suggests that PPI administration limits the regenerative capacity of livers following partial  
17 hepatectomy(55). Administration of PPI upregulates expression of mRNA, protein level, and results in  
18 increased activity of the heme oxygenase-1 enzyme in gastric and endothelial cells(56). Heme oxygenase-1 is  
19 generally seen as salutary, but its beneficial properties are vitiated at higher doses, and with sustained duration  
20 of expression(57). PPI treatment impairs lysosomal acidification and proteostasis and results in increased  
21 oxidative stress, dysfunction, telomere shortening and accelerated senescence of human endothelial cells(18,  
22 58). Wu and collaborators undertook a systematic toxicity mechanism analysis using a high-throughput in-silico  
23 analysis of microarray data; they reported that PPI up-regulated genes in the cellular retinol metabolism  
24 pathway, and down-regulated genes in the complement and coagulation cascades pathway and that PPI may  
25 block pathways of antigen presentation, and abrogate the synthesis and secretion of cytokines and  
26 complement component proteins and coagulation factors(58, 59). How the changes in gene expression  
27 contribute to excess risk of death is not yet entirely clear. The plausible clinical course leading to heightened  
28 risk of death is likely mediated by the occurrence of one or more of the adverse events associated with PPI use  
29 (kidney disease, dementia, hypomagnesemia, Clostridium difficile infection, osteoporotic fracture, etc...).  
30 Further studies are needed to characterize the biologic mechanisms that might explain the epidemiologic  
31 findings in this report.  
32  
33  
34  
35  
36  
37  
38  
39  
40  
41  
42  
43  
44  
45  
46  
47  
48  
49  
50  
51  
52

53 The constellation of findings in this report must be interpreted with the full cognizance of the observational  
54 study design where confounding by indication, and selection bias may represent limitations; we employed an  
55 analytic strategy to evaluate the risk of death among users of acid suppression therapy (PPI and H2 blockers);  
56  
57  
58  
59  
60

1 a class of therapeutics generally prescribed for similar indications, a strategy which may lessen but does not  
2 completely eliminate the possibility of confounding by indication bias. We additionally built time-dependent  
3 propensity score matched cohort, high dimensional propensity score adjusted models, and employed the use  
4 of instrumental variable to reduce potential confounding bias. Although we accounted for known covariates in  
5 our analyses, it is possible that there are residual confounders (either unmeasured, or unknown) that may still  
6 confound the association of PPI and risk of death. However, we evaluated the impact of residual confounding  
7 in quantitative bias analyses, and the results suggest that even with the application of unlikely (and  
8 exaggerated) set of assumptions, the risk cannot be fully explained by residual confounding. In our analyses,  
9 we defined drug exposure as having a prescription for it; since PPI (and H2 blockers) are available over the  
10 counter in the United States, it is possible that some patients in this cohort may have obtained and used PPI  
11 without prescription. However, owing to financial considerations, this is not highly likely, and if it occurred in  
12 some patients, it will have biased the results against the primary hypothesis and resulted in underestimation of  
13 risk. The cohort included mostly older white male US Veterans which may limit the generalizability of study  
14 results to a broader population. Our datasets did not include information on the cause of death. The study has  
15 a number of strengths including the use of national large scale data from a network of integrated health  
16 systems which was captured during routine medical care which minimizes selection bias. We employed a new  
17 user (incident user) approach, and evaluated the association between PPI use and risk of death using a  
18 number of analytical approaches where we consistently found a significant association between PPI use and  
19 increased risk of death. The consistency of study findings in our report, and the growing body of evidence in  
20 the literature showing a host of adverse events associated with PPI use are compelling, and because of the  
21 high prevalence of PPI use, may have public health implications. Exercising pharmacovigilance and limiting  
22 PPI use to instances and durations to instances where it is medically indicated may be warranted.  
23  
24  
25  
26  
27  
28  
29  
30  
31  
32  
33  
34  
35  
36  
37  
38  
39  
40  
41  
42  
43  
44  
45  
46  
47  
48  
49  
50  
51  
52  
53  
54  
55  
56  
57  
58  
59  
60

## Footnotes

**Contributors:** Research area and study design: YX, BB, TL, HX, YY, ZAA; data acquisition: YX, BB; data analysis and interpretation: YX, BB, TL, HX, YY, ZAA; statistical analysis: YX, BB; supervision and mentorship: ZAA. Each author contributed important intellectual content during manuscript drafting or revision and accepts accountability for the overall work by ensuring that questions pertaining to the accuracy or integrity of any portion of the work are appropriately investigated and resolved. ZAA takes responsibility that this study has been reported honestly, accurately, and transparently; that no important aspects of the study have been omitted, and that any discrepancies from the study as planned have been explained.

**Funding:** This research was funded by the United States Department of Veterans Affairs (for ZAA). The funders of this study had no role in study design; collection, analysis, and interpretation of data; writing the report; and the decision to submit the report for publication.

**Competing interests:** All authors have completed the ICMJE uniform disclosure form at [www.icmje.org/coi\\_disclosure.pdf](http://www.icmje.org/coi_disclosure.pdf) and declare: no support from any organisation for the submitted work; no financial relationships with any organisations that might have an interest in the submitted work in the previous three years; no other relationships or activities that could appear to have influenced the submitted work.

**Ethical approval:** This research project was reviewed and approved by the Institutional Review Board of the VA Saint Louis Health Care System.

**Data sharing:** Data is available through the United States Department of Veterans Affairs.

**Transparency:** The lead authors affirm that the manuscript is an honest, accurate, and transparent account of the study being reported; that no important aspects of the study have been omitted; and that any discrepancies from the study as planned have been explained.

**Disclaimer:** The contents do not represent the views of the U.S. Department of Veterans Affairs or the United States Government.

**Disclosures:** None.

## References:

1. Schoenfeld AJ, Grady D. Adverse Effects Associated With Proton Pump Inhibitors. *JAMA internal medicine*. 2016;176(2):172-4.
2. Xie Y, Bowe B, Li T, Xian H, Balasubramanian S, Al-Aly Z. Proton Pump Inhibitors and Risk of Incident CKD and Progression to ESRD. *Journal of the American Society of Nephrology : JASN*. 2016.
3. Antoniou T, Macdonald EM, Hollands S, Gomes T, Mamdani MM, Garg AX, et al. Proton pump inhibitors and the risk of acute kidney injury in older patients: a population-based cohort study. *CMAJ open*. 2015;3(2):E166-71.
4. Klepser DG, Collier DS, Cochran GL. Proton pump inhibitors and acute kidney injury: a nested case-control study. *BMC nephrology*. 2013;14:150.
5. Blank ML, Parkin L, Paul C, Herbison P. A nationwide nested case-control study indicates an increased risk of acute interstitial nephritis with proton pump inhibitor use. *Kidney international*. 2014;86(4):837-44.
6. Lazarus B, Chen Y, Wilson FP, Sang Y, Chang AR, Coresh J, et al. Proton Pump Inhibitor Use and the Risk of Chronic Kidney Disease. *JAMA internal medicine*. 2016;176(2):238-46.
7. Xie Y, Bowe B, Li T, Xian H, Yan Y, Al-Aly Z. Long Term Kidney Outcomes among Proton Pump Inhibitors Users without Intervening Acute Kidney Injury. *Kidney international*. 2016.
8. Gomm W, von Holt K, Thome F, Broich K, Maier W, Fink A, et al. Association of Proton Pump Inhibitors With Risk of Dementia: A Pharmacoepidemiological Claims Data Analysis. *JAMA neurology*. 2016;73(4):410-6.
9. Danziger J, William JH, Scott DJ, Lee J, Lehman LW, Mark RG, et al. Proton-pump inhibitor use is associated with low serum magnesium concentrations. *Kidney international*. 2013;83(4):692-9.
10. Kieboom BC, Kieffe-de Jong JC, Eijgelsheim M, Franco OH, Kuipers EJ, Hofman A, et al. Proton pump inhibitors and hypomagnesemia in the general population: a population-based cohort study. *American journal of kidney diseases : the official journal of the National Kidney Foundation*. 2015;66(5):775-82.
11. Broeren MA, Geerdink EA, Vader HL, van den Wall Bake AW. Hypomagnesemia induced by several proton-pump inhibitors. *Annals of internal medicine*. 2009;151(10):755-6.
12. Kwok CS, Arthur AK, Anibueze CI, Singh S, Cavallazzi R, Loke YK. Risk of Clostridium difficile infection with acid suppressing drugs and antibiotics: meta-analysis. *The American journal of gastroenterology*. 2012;107(7):1011-9.
13. Zhou B, Huang Y, Li H, Sun W, Liu J. Proton-pump inhibitors and risk of fractures: an update meta-analysis. *Osteoporosis international : a journal established as result of cooperation between the European Foundation for Osteoporosis and the National Osteoporosis Foundation of the USA*. 2015.
14. Yu EW, Bauer SR, Bain PA, Bauer DC. Proton pump inhibitors and risk of fractures: a meta-analysis of 11 international studies. *The American journal of medicine*. 2011;124(6):519-26.
15. Melloni C, Washam JB, Jones WS, Halim SA, Hasselblad V, Mayer SB, et al. Conflicting results between randomized trials and observational studies on the impact of proton pump inhibitors on cardiovascular events when coadministered with dual antiplatelet therapy: systematic review. *Circulation Cardiovascular quality and outcomes*. 2015;8(1):47-55.
16. Fillion KB, Chateau D, Targownik LE, Gershon A, Durand M, Tamim H, et al. Proton pump inhibitors and the risk of hospitalisation for community-acquired pneumonia: replicated cohort studies with meta-analysis. *Gut*. 2014;63(4):552-8.
17. Eom CS, Jeon CY, Lim JW, Cho EG, Park SM, Lee KS. Use of acid-suppressive drugs and risk of pneumonia: a systematic review and meta-analysis. *CMAJ : Canadian Medical Association journal = journal de l'Association medicale canadienne*. 2011;183(3):310-9.
18. Yepuri G, Sukhovshin R, Nazari-Shafti TZ, Petrascheck M, Ghebre YT, Cooke JP. Proton Pump Inhibitors Accelerate Endothelial Senescence. *Circulation research*. 2016.
19. Bell JS, Strandberg TE, Teramura-Gronblad M, Laurila JV, Tilvis RS, Pitkala KH. Use of proton pump inhibitors and mortality among institutionalized older people. *Archives of internal medicine*. 2010;170(17):1604-5.
20. Maggio M, Corsonello A, Ceda GP, Cattabiani C, Lauretani F, Butto V, et al. Proton pump inhibitors and risk of 1-year mortality and rehospitalization in older patients discharged from acute care hospitals. *JAMA internal medicine*. 2013;173(7):518-23.
21. Teramura-Gronblad M, Bell JS, Poysti MM, Strandberg TE, Laurila JV, Tilvis RS, et al. Risk of death associated with use of PPIs in three cohorts of institutionalized older people in Finland. *Journal of the American Medical Directors Association*. 2012;13(5):488 e9-13.



22. Wilson N, Gnjidic D, March L, Sambrook P, Hilmer SN. Use of PPIs are not associated with mortality in institutionalized older people. *Archives of internal medicine*. 2011;171(9):866; author reply -7.
23. Hu JCaM. Covariance Analysis of Heart Transplant Survival Data. *Journal of the American Statistical Association*. 1977;Vol. 72(No. 357 (Mar, 1977)):27-36
24. Li T, Xie Y, Bowe B, Xian H, Al-Aly Z. Serum phosphorus levels and risk of incident dementia. *PloS one*. 2017;12(2):e0171377.
25. Gawron AJ, Pandolfino JE, Miskevics S, Lavela SL. Proton pump inhibitor prescriptions and subsequent use in US veterans diagnosed with gastroesophageal reflux disease. *Journal of general internal medicine*. 2013;28(7):930-7.
26. Bowe B, Xie Y, Xian H, Balasubramanian S, Al-Aly Z. Low levels of high-density lipoprotein cholesterol increase the risk of incident kidney disease and its progression. *Kidney international*. 2016;89(4):886-96.
27. Bowe B, Xie Y, Xian H, Balasubramanian S, M AZ, Al-Aly Z. High Density Lipoprotein Cholesterol and the Risk of All-Cause Mortality among U.S. Veterans. *Clinical journal of the American Society of Nephrology : CJASN*. 2016.
28. Bowe B XY, Xian H, Lian M, Al-Aly Z. Geographic Variation and US County Characteristics Associated with Rapid Kidney Function Decline. *Kidney International Reports*. 2016.
29. Levey AS, Stevens LA, Schmid CH, Zhang YL, Castro AF, 3rd, Feldman HI, et al. A new equation to estimate glomerular filtration rate. *Annals of internal medicine*. 2009;150(9):604-12.
30. Xie Y, Bowe B, Xian H, Balasubramanian S, Al-Aly Z. Estimated GFR Trajectories of People Entering CKD Stage 4 and Subsequent Kidney Disease Outcomes and Mortality. *American journal of kidney diseases : the official journal of the National Kidney Foundation*. 2016.
31. Xie Y, Bowe B, Xian H, Balasubramanian S, Al-Aly Z. Rate of Kidney Function Decline and Risk of Hospitalizations in Stage 3A CKD. *Clinical journal of the American Society of Nephrology : CJASN*. 2015;10(11):1946-55.
32. Xie Y, Bowe B, Xian H, Balasubramanian S, Al-Aly Z. Estimated GFR Trajectories of People Entering CKD Stage 4 and Subsequent Kidney Disease Outcomes and Mortality. *American journal of kidney diseases : the official journal of the National Kidney Foundation*. 2016;68(2):219-28.
33. Xie Y, Bowe B, Xian H, Balasubramanian S, Al-Aly Z. Renal Function Trajectories in Patients with Prior Improved eGFR Slopes and Risk of Death. *PloS one*. 2016;11(2):e0149283.
34. Schultz LR, Peterson EL, Breslau N. Graphing survival curve estimates for time-dependent covariates. *Int J Methods Psychiatr Res*. 2002;11(2):68-74.
35. Lu B. Propensity score matching with time-dependent covariates. *Biometrics*. 2005;61(3):721-8.
36. Funk MJ, Westreich D, Wiesen C, Sturmer T, Brookhart MA, Davidian M. Doubly robust estimation of causal effects. *American journal of epidemiology*. 2011;173(7):761-7.
37. Schneeweiss S, Rassen JA, Glynn RJ, Avorn J, Mogun H, Brookhart MA. High-dimensional propensity score adjustment in studies of treatment effects using health care claims data. *Epidemiology*. 2009;20(4):512-22.
38. Terza JV, Basu A, Rathouz PJ. Two-stage residual inclusion estimation: addressing endogeneity in health econometric modeling. *J Health Econ*. 2008;27(3):531-43.
39. I Adams AL, Black MH, Zhang JL, Shi JM, Jacobsen SJ. Proton-pump inhibitor use and hip fractures in men: a population-based case-control study. *Annals of epidemiology*. 2014;24(4):286-90.
40. Suissa S. Immortal time bias in observational studies of drug effects. *Pharmacoepidemiology and drug safety*. 2007;16(3):241-9.
41. Schneeweiss S. Sensitivity analysis and external adjustment for unmeasured confounders in epidemiologic database studies of therapeutics. *Pharmacoepidemiology and drug safety*. 2006;15(5):291-303.
42. Collaborators GBDRF. Global, regional, and national comparative risk assessment of 79 behavioural, environmental and occupational, and metabolic risks or clusters of risks, 1990-2015: a systematic analysis for the Global Burden of Disease Study 2015. *Lancet*. 2016;388(10053):1659-724.
43. Mortality GBD, Causes of Death C. Global, regional, and national life expectancy, all-cause mortality, and cause-specific mortality for 249 causes of death, 1980-2015: a systematic analysis for the Global Burden of Disease Study 2015. *Lancet*. 2016;388(10053):1459-544.
44. Hvid-Jensen F NR, Pedersen L, Funch-Jensen P, Drewes AM, Larsen FB, Thomsen RW Lifestyle factors among proton pump inhibitor users and nonusers: a cross-sectional study in a population-based setting. *Dovepress*. 4 December 2013 Volume 2013:5(1) Pages 493—499.



- 1 45. Kantor ED, Rehm CD, Haas JS, Chan AT, Giovannucci EL. Trends in Prescription Drug Use Among  
2 Adults in the United States From 1999-2012. *Jama*. 2015;314(17):1818-31.
- 3 46. Forgacs I, Loganayagam A. Overprescribing proton pump inhibitors. *Bmj*. 2008;336(7634):2-3.
- 4 47. Choudhry MN, Soran H, Ziglam HM. Overuse and inappropriate prescribing of proton pump inhibitors in  
5 patients with *Clostridium difficile*-associated disease. *QJM : monthly journal of the Association of Physicians*.  
6 2008;101(6):445-8.
- 7 48. Zink DA, Pohlman M, Barnes M, Cannon ME. Long-term use of acid suppression started  
8 inappropriately during hospitalization. *Alimentary pharmacology & therapeutics*. 2005;21(10):1203-9.
- 9 49. Strid H, Simren M, Bjornsson ES. Overuse of acid suppressant drugs in patients with chronic renal  
10 failure. *Nephrology, dialysis, transplantation : official publication of the European Dialysis and Transplant  
11 Association - European Renal Association*. 2003;18(3):570-5.
- 12 50. Qato DM, Alexander GC, Conti RM, Johnson M, Schumm P, Lindau ST. Use of prescription and over-  
13 the-counter medications and dietary supplements among older adults in the United States. *Jama*.  
14 2008;300(24):2867-78.
- 15 51. Katz MH. Failing the acid test: benefits of proton pump inhibitors may not justify the risks for many  
16 users. *Archives of internal medicine*. 2010;170(9):747-8.
- 17 52. Linsky A, Simon SR. Reversing gears: discontinuing medication therapy to prevent adverse events.  
18 *JAMA internal medicine*. 2013;173(7):524-5.
- 19 53. Grady D, Redberg RF. Less is more: how less health care can result in better health. *Archives of  
20 internal medicine*. 2010;170(9):749-50.
- 21 54. Yachinski PS, Farrell EA, Hunt DP, Reid AE. Proton pump inhibitors for prophylaxis of nosocomial  
22 upper gastrointestinal tract bleeding: effect of standardized guidelines on prescribing practice. *Archives of  
23 internal medicine*. 2010;170(9):779-83.
- 24 55. Kucuk HF, Akyol H, Kaptanoglu L, Kurt N, Barisik NO, Bingul S, et al. Effect of proton pump inhibitors  
25 on hepatic regeneration. *Eur Surg Res*. 2006;38(3):322-8.
- 26 56. Becker JC, Grosser N, Waltke C, Schulz S, Erdmann K, Domschke W, et al. Beyond gastric acid  
27 reduction: proton pump inhibitors induce heme oxygenase-1 in gastric and endothelial cells. *Biochem Biophys  
28 Res Commun*. 2006;345(3):1014-21.
- 29 57. Nath KA. Heme oxygenase-1 and acute kidney injury. *Current opinion in nephrology and hypertension*.  
30 2014;23(1):17-24.
- 31 58. Wu D, Qiu T, Zhang Q, Kang H, Yuan S, Zhu L, et al. Systematic toxicity mechanism analysis of proton  
32 pump inhibitors: an in silico study. *Chem Res Toxicol*. 2015;28(3):419-30.
- 33 59. Liu W, Baker SS, Trinidad J, Burlingame AL, Baker RD, Forte JG, et al. Inhibition of lysosomal enzyme  
34 activities by proton pump inhibitors. *J Gastroenterol*. 2013;48(12):1343-52.
- 35  
36  
37  
38  
39  
40  
41  
42  
43  
44  
45  
46  
47  
48  
49  
50  
51  
52  
53  
54  
55  
56  
57  
58  
59  
60

**Table 1:** Baseline demographic and health characteristics of overall primary cohort of new users of acid suppression therapy, by type of acid suppressant at time of cohort entry, and those who were ever exposed to PPI.

|                                                         | Overall cohort | New users of H2 Blockers at time of cohort entry | New users of PPI at time of cohort entry | Ever exposed to PPI <sup>a</sup> | P Value <sup>b</sup> |        |
|---------------------------------------------------------|----------------|--------------------------------------------------|------------------------------------------|----------------------------------|----------------------|--------|
| N                                                       | 349312         | 73335                                            | 275977                                   | 309113                           |                      |        |
| Age (SD)                                                | 61.00 (14.92)  | 58.48 (15.13)                                    | 61.67 (14.79)                            | 61.37 (14.77)                    | <0.001               |        |
| eGFR in mL/min/1.73m <sup>2</sup> (SD)                  | 76.89 (22.66)  | 79.64 (21.96)                                    | 76.16 (22.79)                            | 76.60 (22.79)                    | <0.001               |        |
| Number of outpatient serum creatinine measurements (SD) | 6.85 (7.55)    | 6.67 (7.39)                                      | 6.89 (7.59)                              | 7.27 (8.00)                      | <0.001               |        |
| Number of hospitalizations (SD)                         | 0.51 (1.39)    | 0.52 (1.45)                                      | 0.51 (1.37)                              | 0.56 (1.49)                      | 0.014                |        |
| Race                                                    | White (%)      | 275473 (78.86)                                   | 56530 (77.08)                            | 218943 (79.33)                   | 244230 (79.01)       | <0.001 |
|                                                         | Black (%)      | 59243 (16.96)                                    | 13229 (18.04)                            | 46014 (16.67)                    | 52207 (16.89)        |        |
|                                                         | Other (%)      | 14596 (4.18)                                     | 3576 (4.88)                              | 11020 (3.99)                     | 12676 (4.10)         |        |
| Sex                                                     | Male (%)       | 326659 (93.51)                                   | 67748 (92.38)                            | 258911 (93.82)                   | 289233 (93.57)       | <0.001 |
|                                                         | Female (%)     | 22653 (6.49)                                     | 5587 (7.62)                              | 17066 (6.18)                     | 19880 (6.43)         |        |
| Diabetes mellitus (%)                                   | 90273 (25.84)  | 16758 (22.85)                                    | 73515 (26.64)                            | 82168 (26.58)                    | <0.001               |        |
| Hypertension (%)                                        | 225899 (64.67) | 44502 (60.68)                                    | 181397 (65.73)                           | 203700 (65.90)                   | <0.001               |        |
| Chronic lung disease (%)                                | 70281 (20.12)  | 13849 (18.88)                                    | 56432 (20.45)                            | 64777 (20.96)                    | <0.001               |        |
| Peripheral artery disease (%)                           | 11439 (3.27)   | 2225 (3.03)                                      | 9214 (3.34)                              | 10680 (3.46)                     | <0.001               |        |
| Cardiovascular disease (%)                              | 98137 (28.09)  | 17436 (23.78)                                    | 80701 (29.24)                            | 89878 (29.08)                    | <0.001               |        |
| Cerebrovascular disease (%)                             | 1858 (0.53)    | 372 (0.51)                                       | 1486 (0.54)                              | 1719 (0.56)                      | 0.30                 |        |
| Dementia (%)                                            | 16421(4.70)    | 3115 (4.25)                                      | 13306 (4.82)                             | 15384 (4.98)                     | <0.001               |        |
| Hyperlipidemia (%)                                      | 200397 (57.37) | 39818 (54.30)                                    | 160579 (58.19)                           | 181524 (58.72)                   | <0.001               |        |
| Hepatitis C (%)                                         | 5034 (1.44)    | 1184 (1.61)                                      | 3850 (1.40)                              | 4444 (1.44)                      | <0.001               |        |
| HIV (%)                                                 | 114 (0.03)     | 38 (0.05)                                        | 76 (0.03)                                | 113 (0.04)                       | 0.001                |        |
| Cancer (%)                                              | 49666 (14.22)  | 9123 (12.44)                                     | 40543 (14.69)                            | 45633 (14.76)                    | <0.001               |        |
| GERD (%)                                                | 100980 (28.91) | 20562 (28.04)                                    | 80418 (29.14)                            | 94517 (30.58)                    | <0.001               |        |
| Upper GI tract bleeding (%)                             | 9310 (2.67)    | 926 (1.26)                                       | 8384 (3.04)                              | 9098 (2.94)                      | <0.001               |        |
| Ulcer disease (%)                                       | 25626 (7.34)   | 3564 (4.86)                                      | 22062 (7.99)                             | 24864 (8.04)                     | <0.001               |        |
| H. Pylori infection (%)                                 | 3078 (0.88)    | 141 (0.19)                                       | 2937 (1.06)                              | 3239 (1.05)                      | <0.001               |        |
| Barrett's esophagus (%)                                 | 2324 (0.67)    | 89 (0.12)                                        | 2235 (0.81)                              | 2382 (0.77)                      | <0.001               |        |
| Achalasia (%)                                           | 151 (0.04)     | 10 (0.01)                                        | 141 (0.05)                               | 154 (0.05)                       | <0.001               |        |
| Stricture (%)                                           | 1992 (0.57)    | 132 (0.18)                                       | 1860 (0.67)                              | 2051 (0.66)                      | <0.001               |        |
| Esophageal                                              | 213 (0.06)     | 17 (0.02)                                        | 196 (0.07)                               | 213 (0.07)                       | <0.001               |        |

|                                                                   |                                                            |                                  |                                    |                       |                       |        |
|-------------------------------------------------------------------|------------------------------------------------------------|----------------------------------|------------------------------------|-----------------------|-----------------------|--------|
| 1<br>2<br>3<br>4<br>5<br>6<br>7<br>8<br>9<br>10<br>11<br>12<br>13 | adenocarcinoma (%)                                         |                                  |                                    |                       |                       |        |
|                                                                   | Years of follow up (IQR) <sup>c</sup>                      | 5.71<br>(5.11 – 6.37)            | 4.38<br>(1.16 – 5.92) <sup>d</sup> | 5.67<br>(5.09 – 6.34) | 5.59<br>(4.82 – 6.28) | <0.001 |
|                                                                   | Days of having related prescription during follow-up (IQR) | 442<br>(199 – 1272) <sup>e</sup> | 120<br>(60 – 400) <sup>d</sup>     | 450<br>(120 – 1299)   | 450<br>(120 – 1266)   | <0.001 |
|                                                                   | Death (%)                                                  | 81463 (23.32)                    | 9018 (12.30) <sup>d</sup>          | 67450 (24.44)         | 72445 (23.44)         | <0.001 |
|                                                                   | Incident death in 100 person years (95% CI)                | 4.47<br>(4.44 – 4.50)            | 3.32<br>(3.25 – 3.39) <sup>d</sup> | 4.74<br>(4.70 – 4.77) | 4.67<br>(4.64 – 4.71) | <0.001 |

- 14 a. Includes patients exposed to PPI at T0 (n=275977) and during follow-up (n=33136).  
Variables were measured at time of PPI exposure.
- 15 b. P value for difference between exposed to H2 at T0 and exposed to PPI at T0
- 16 c. From T0 to first occurrence of death or September 30, 2013
- 17 d. Outcome measured from T0 to first occurrence of exposure PPI, death or September 30, 2007
- 18 e. Days of having PPI or H2 blockers

22 Abbreviations: CI, Confidence interval; eGFR, estimated Glomerular Filtration Rate; GERD,  
23 Gastroesophageal Reflux Disease; HIV, human immunodeficiency virus; IQR, interquartile range;  
24 SD, Standard deviation

**Table 2:** Association between PPI use and risk of death:

| Association Between PPI and Death                                                                  |                           | Reference             | PPI use               |
|----------------------------------------------------------------------------------------------------|---------------------------|-----------------------|-----------------------|
| PPI use VS H2 blockers use<br>(N=349,312)                                                          | Incident rate<br>(95% CI) | 3.32<br>(3.25 – 3.39) | 4.67<br>(4.64 – 4.71) |
|                                                                                                    | Unadjusted HR<br>(95% CI) | 1                     | 1.46<br>(1.43 – 1.49) |
|                                                                                                    | Adjusted HR<br>(95% CI)   | 1                     | 1.25<br>(1.23 – 1.28) |
| High-dimensional propensity score adjusted model of new users of PPI VS H2 blockers<br>(N=349,312) | Incident rate<br>(95% CI) | 3.32<br>(3.25 – 3.39) | 4.74<br>(4.70, 4.77)  |
|                                                                                                    | HR<br>(95% CI)            | 1                     | 1.16<br>(1.13 – 1.18) |
| Two-stage residual inclusion estimation model of new users of PPI VS H2 blockers<br>(N=318,960)    | Incident rate<br>(95% CI) | 3.32<br>(3.25 – 3.39) | 4.74<br>(4.70 – 4.77) |
|                                                                                                    | HR<br>(95% CI)            | 1                     | 1.21<br>(1.16 – 1.26) |
| Time dependent propensity score matched PPI VS H2 blockers<br>(N=146,670)                          | Incident rate<br>(95% CI) | 3.32<br>(3.25 – 3.39) | 4.37<br>(4.30 – 4.44) |
|                                                                                                    | Unadjusted HR<br>(95% CI) | 1                     | 1.38<br>(1.34 – 1.42) |
|                                                                                                    | Adjusted HR<br>(95% CI)   | 1                     | 1.34<br>(1.29 – 1.39) |
| PPI use VS no PPI<br>(N=3,288,092)                                                                 | Incident rate<br>(95% CI) | 3.64<br>(3.63 – 3.65) | 5.50<br>(5.47 – 5.53) |
|                                                                                                    | Unadjusted HR<br>(95% CI) | 1                     | 1.47<br>(1.46 – 1.48) |
|                                                                                                    | Adjusted HR<br>(95% CI)   | 1                     | 1.15<br>(1.14 – 1.15) |
| PPI use VS no PPI or H2 blockers<br>(N=2,886,879)                                                  | Incident rate<br>(95% CI) | 3.47<br>(3.46 – 3.48) | 5.50<br>(5.47 – 5.53) |
|                                                                                                    | Unadjusted HR<br>(95% CI) | 1                     | 1.53<br>(1.52 – 1.54) |
|                                                                                                    | Adjusted HR<br>(95% CI)   | 1                     | 1.23<br>(1.22 – 1.24) |
| PPI VS H2 blockers in a cohort without GI conditions<br>(N=214,521)                                | Incident rate<br>(95% CI) | 3.80<br>(3.71 – 3.89) | 5.39<br>(5.34 – 5.44) |
|                                                                                                    | Unadjusted HR<br>(95% CI) | 1                     | 1.47<br>(1.43 – 1.51) |
|                                                                                                    | Adjusted HR<br>(95% CI)   | 1                     | 1.24<br>(1.21 – 1.27) |
| PPI VS no PPI in a cohort without GI conditions<br>(N=2,790,697)                                   | Incident rate<br>(95% CI) | 3.54<br>(3.53 – 3.55) | 5.89<br>(5.86 – 5.93) |
|                                                                                                    | Unadjusted HR<br>(95% CI) | 1                     | 1.62<br>(1.61 – 1.63) |
|                                                                                                    | Adjusted HR<br>(95% CI)   | 1                     | 1.19<br>(1.18 – 1.20) |

|                                                                                                                                                                                                                                                                                                                                                                                                                                                                                                                                                                                                                                                                                                                                                                                                                                                                                                                                                                                                                                                                                                                                                                                                                                           |                        |                       |                       |
|-------------------------------------------------------------------------------------------------------------------------------------------------------------------------------------------------------------------------------------------------------------------------------------------------------------------------------------------------------------------------------------------------------------------------------------------------------------------------------------------------------------------------------------------------------------------------------------------------------------------------------------------------------------------------------------------------------------------------------------------------------------------------------------------------------------------------------------------------------------------------------------------------------------------------------------------------------------------------------------------------------------------------------------------------------------------------------------------------------------------------------------------------------------------------------------------------------------------------------------------|------------------------|-----------------------|-----------------------|
| 1<br>2<br>3<br>4<br>5<br>6<br>PPI VS no PPI or H2 blockers in a cohort without GI conditions (N=2,543,480)                                                                                                                                                                                                                                                                                                                                                                                                                                                                                                                                                                                                                                                                                                                                                                                                                                                                                                                                                                                                                                                                                                                                | Incident rate (95% CI) | 3.45<br>(3.44 – 3.46) | 5.89<br>(5.86 – 5.93) |
|                                                                                                                                                                                                                                                                                                                                                                                                                                                                                                                                                                                                                                                                                                                                                                                                                                                                                                                                                                                                                                                                                                                                                                                                                                           | Unadjusted HR (95% CI) | 1                     | 1.65<br>(1.64 – 1.67) |
|                                                                                                                                                                                                                                                                                                                                                                                                                                                                                                                                                                                                                                                                                                                                                                                                                                                                                                                                                                                                                                                                                                                                                                                                                                           | Adjusted HR (95% CI)   | 1                     | 1.22<br>(1.21 – 1.23) |
| 7<br>8<br>9<br>10<br>11<br>12<br>13<br>PPI VS H2 blockers in a cohort without GI conditions except for GERD (N=311,115)                                                                                                                                                                                                                                                                                                                                                                                                                                                                                                                                                                                                                                                                                                                                                                                                                                                                                                                                                                                                                                                                                                                   | Incident rate (95% CI) | 3.30<br>(3.23 – 3.37) | 4.51<br>(4.47 – 4.54) |
|                                                                                                                                                                                                                                                                                                                                                                                                                                                                                                                                                                                                                                                                                                                                                                                                                                                                                                                                                                                                                                                                                                                                                                                                                                           | Unadjusted HR (95% CI) | 1                     | 1.42<br>(1.38 – 1.45) |
|                                                                                                                                                                                                                                                                                                                                                                                                                                                                                                                                                                                                                                                                                                                                                                                                                                                                                                                                                                                                                                                                                                                                                                                                                                           | Adjusted HR (95% CI)   | 1                     | 1.24<br>(1.21 – 1.27) |
| 14<br>15<br>16<br>17<br>18<br>19<br>20<br>PPI VS no PPI in a cohort without GI conditions except for GERD (N=3,132,126)                                                                                                                                                                                                                                                                                                                                                                                                                                                                                                                                                                                                                                                                                                                                                                                                                                                                                                                                                                                                                                                                                                                   | Incident rate (95% CI) | 3.59<br>(3.58 – 3.60) | 5.36<br>(5.34 – 5.39) |
|                                                                                                                                                                                                                                                                                                                                                                                                                                                                                                                                                                                                                                                                                                                                                                                                                                                                                                                                                                                                                                                                                                                                                                                                                                           | Unadjusted HR (95% CI) | 1                     | 1.45<br>(1.44 – 1.46) |
|                                                                                                                                                                                                                                                                                                                                                                                                                                                                                                                                                                                                                                                                                                                                                                                                                                                                                                                                                                                                                                                                                                                                                                                                                                           | Adjusted HR (95% CI)   | 1                     | 1.14<br>(1.13 – 1.14) |
| 21<br>22<br>23<br>24<br>25<br>26<br>27<br>PPI VS no PPI or H2 blockers in a cohort without GI conditions except for GERD (N=2,678,478)                                                                                                                                                                                                                                                                                                                                                                                                                                                                                                                                                                                                                                                                                                                                                                                                                                                                                                                                                                                                                                                                                                    | Incident rate (95% CI) | 3.44<br>(3.44 – 3.45) | 5.36<br>(5.34 – 5.39) |
|                                                                                                                                                                                                                                                                                                                                                                                                                                                                                                                                                                                                                                                                                                                                                                                                                                                                                                                                                                                                                                                                                                                                                                                                                                           | Unadjusted HR (95% CI) | 1                     | 1.50<br>(1.49 – 1.51) |
|                                                                                                                                                                                                                                                                                                                                                                                                                                                                                                                                                                                                                                                                                                                                                                                                                                                                                                                                                                                                                                                                                                                                                                                                                                           | Adjusted HR (95% CI)   | 1                     | 1.22<br>(1.21 – 1.22) |
| <p>28 a. Incident rate as incident death in 100 person years</p> <p>29 b. All models except time dependent propensity score matched and high-dimensional propensity score adjusted models were time dependent models. Effect of PPI was treated as time dependent and was defined as once patients used PPI, they were in PPI group during the remaining follow-up.</p> <p>30 c. Adjusted model controlling for eGFR, age, race, gender, number of serum creatinine measurements, number of hospitalizations, diabetes mellitus, hypertension, cardiovascular disease, peripheral artery disease, cerebrovascular disease, chronic lung disease, hepatitis C, HIV, dementia, cancer, GERD, upper GI tract bleeding, ulcer disease, H. Pylori infection, Barrett's esophagus, achalasia, stricture and esophageal adenocarcinoma, unless used in analysis inclusion criteria.</p> <p>31 d. GI conditions include upper GI tract bleeding, ulcer disease, H. Pylori infection, Barrett's esophagus, achalasia, stricture and esophageal adenocarcinoma</p> <p>32</p> <p>33</p> <p>34</p> <p>35</p> <p>36</p> <p>37</p> <p>38</p> <p>39</p> <p>40</p> <p>41</p> <p>42</p> <p>43 Abbreviations: CI, Confidence interval; HR, Hazard Ratio</p> |                        |                       |                       |

**Table 3:** Duration of exposure to PPI and risk of death among new users of PPI (n=166,098)

| Duration (Days)                                                                                                                                                                                                                                                                                                                                                                                                                                                                                                                                                              | ≤ 30          | 31 - 90          | 91 - 180         | 181 - 360        | 361 - 720        |
|------------------------------------------------------------------------------------------------------------------------------------------------------------------------------------------------------------------------------------------------------------------------------------------------------------------------------------------------------------------------------------------------------------------------------------------------------------------------------------------------------------------------------------------------------------------------------|---------------|------------------|------------------|------------------|------------------|
| N (%)                                                                                                                                                                                                                                                                                                                                                                                                                                                                                                                                                                        | 24748 (14.90) | 39345 (23.69)    | 29334 (17.66)    | 33907 (20.41)    | 38764 (23.34)    |
| Hazard Ratio (95%CI)                                                                                                                                                                                                                                                                                                                                                                                                                                                                                                                                                         | 1             | 1.05 (1.02-1.08) | 1.17 (1.13-1.20) | 1.31 (1.27-1.34) | 1.51 (1.47-1.56) |
| a. Within people exposure to PPI between 1 to 720 days<br>b. Model controls for eGFR, age, race, gender, number of serum creatinine measurements, number of hospitalizations, diabetes mellitus, hypertension, cardiovascular disease, peripheral artery disease, cerebrovascular disease, chronic lung disease, hepatitis C, HIV, dementia, cancer, GERD, upper GI tract bleeding, ulcer disease, H. Pylori infection, Barrett's esophagus, achalasia, stricture and esophageal adenocarcinoma<br>c. Time zero defined as date when the patients last PPI prescription ends |               |                  |                  |                  |                  |

**Figure legends:**

**Figure 1:** Survival curves for PPI and H2 blockers

**Figure 2:** Duration of PPI exposure and risk of death among new PPI users (n=166,098)

**Supplemental Figures:**

**Supplemental Figure 1:** Flowchart of primary cohort

**Supplemental Figure 2a:** Flowchart of secondary cohort PPI vs no PPI

**Supplemental Figure 2b:** Flowchart of secondary cohort PPI vs no PPI no H2 blockers

**Supplemental figure 3:** Duration of PPI exposure and risk of death among new PPI users in an older (less contemporary) sensitivity cohort (n=101,109)

**Supplemental figure 4: Estimation of the impact of uncontrolled confounder using the rule-out**

**approach:** To investigate the impact of potential residual confounding; rule-out approach was used, where prevalence of potential confounder was set at 30% and prevalence of exposure (PPI use) was set at 88.5% (the latter is derived from our data). The X axis describes the Odds Ratio (OR) of the association between the confounder and PPI users. The Y axis describes the Hazard Ratio (HR) of the association between the confounder and risk of death. The blue line splits the area into two: the upper right area represents all parameter combinations of OR (between PPI use and confounder) and HR (between confounder and death) that are strong enough to move the apparent HR (AHR) from 1.25 (the HR observed in our primary analysis) to 1 or lower, rejecting the hypothesis of an association between PPI use and risk of death. The corollary observation is that the area to the lower left represents all parameter combinations that would result in acceptance of the primary hypothesis. For example, the results show that for uncontrolled confounder that is twice as likely among PPI users (OR=2), the strength of the association between the uncontrolled confounder and risk of death would have to exceed 4 (HR>4) for the uncontrolled confounder to fully explain the observed association between PPI and death (where the combination of OR=2, HR>4 is in the area above the blue line).



**Supplemental figure 5: External adjustment to estimate the impact of 3 unmeasured confounders: To**

investigate the impact of potential residual confounding, we applied external adjustment to estimate the impact of 3 unmeasured confounders including obesity, smoking, and use of therapeutics including anticoagulants, antiplatelet agents, and non-steroidal anti-inflammatory drugs. In order to generate extreme bias estimates (against the hypothesis) we assumed that users of H2 Blockers are generally healthy and have similar health characteristics as the general population. We used published estimates from external data sources as follows (2, 41-44): Prevalence of obesity 30.00%, OR for PPI and obesity=1.30, and HR for obesity and death =1.30; prevalence of smoking=24.79%, OR for PPI and smoking =1.20, and HR for smoking and death =2.80; prevalence of anticoagulants, antiplatelet, and NSAIDs use=28.85%, OR for PPI and drug =2.20, and HR for drug and death =1.30. Given the HR between each confounder and risk of death, and assuming there is no overlap in risk among confounders (which is an unlikely assumption, but one which would generate the greatest amount of bias against our hypothesis), we found a total positive bias (or net confounding bias) of 9.66% (1.47%+4.23%+3.96%). The total bias could move a null association between PPI to death from HR=1.00 to HR=1.10 (reflecting the net positive bias of 9.66% rounded up to 10.0%). The association we observed between PPI and death is 1.25 (higher than 1.10), suggesting that it cannot be fully due to bias of unmeasured confounding. (Using the curves in the figures; for obesity, when the HR=1.30, the corresponding bias=1.47%; for smoking, when the HR=2.80, the corresponding bias=4.23%; for anticoagulants, antiplatelet, and NSAIDs, when the HR=1.30, the corresponding bias=3.96%).

1  
2  
3  
4  
5  
6  
7  
8  
9  
10  
11  
12  
13  
14  
15  
16  
17  
18  
19  
20  
21  
22  
23  
24  
25  
26  
27  
28  
29  
30  
31  
32  
33  
34  
35  
36  
37  
38  
39  
40  
41  
42  
43  
44  
45  
46  
47  
48  
49  
50  
51  
52  
53  
54  
55  
56  
57  
58  
59  
60

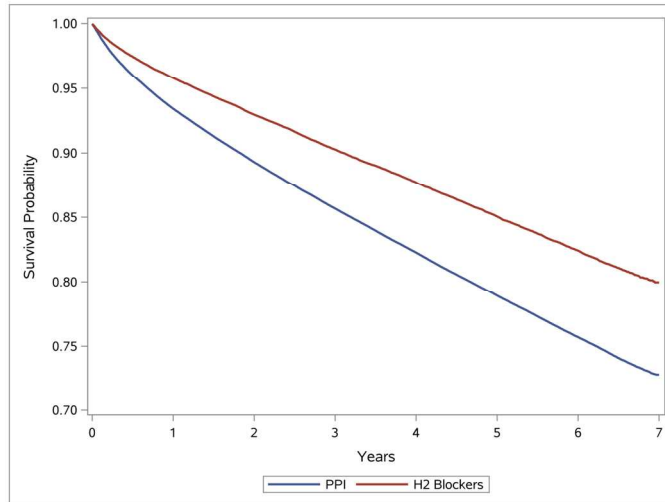

Figure 1: Survival curves for PPI and H2 blockers  
Figure 1  
190x142mm (300 x 300 DPI)

ew only

1  
2  
3  
4  
5  
6  
7  
8  
9  
10  
11  
12  
13  
14  
15  
16  
17  
18  
19  
20  
21  
22  
23  
24  
25  
26  
27  
28  
29  
30  
31  
32  
33  
34  
35  
36  
37  
38  
39  
40  
41  
42  
43  
44  
45  
46  
47  
48  
49  
50  
51  
52  
53  
54  
55  
56  
57  
58  
59  
60

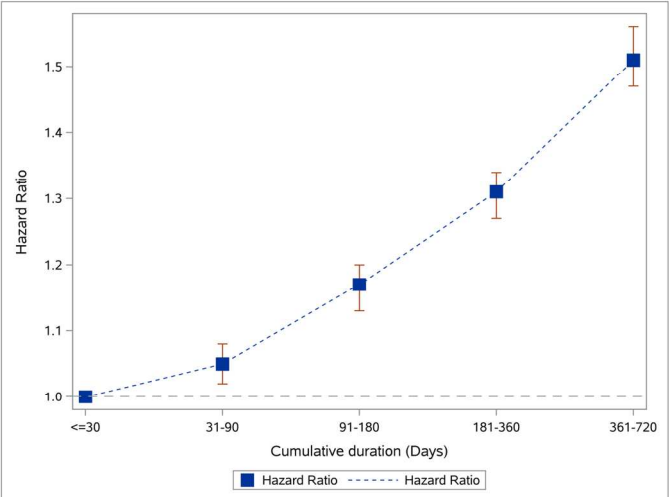

Figure 2: Duration of PPI exposure and risk of death among new PPI users (n=166,098)  
Figure 2  
190x142mm (300 x 300 DPI)

ew only

# Supplemental Figure 1

1  
2  
3  
4  
5  
6  
7  
8  
9  
10  
11  
12  
13  
14  
15  
16  
17  
18  
19  
20  
21  
22  
23  
24  
25  
26  
27  
28  
29  
30  
31  
32  
33  
34  
35  
36  
37  
38  
39  
40  
41  
42  
43

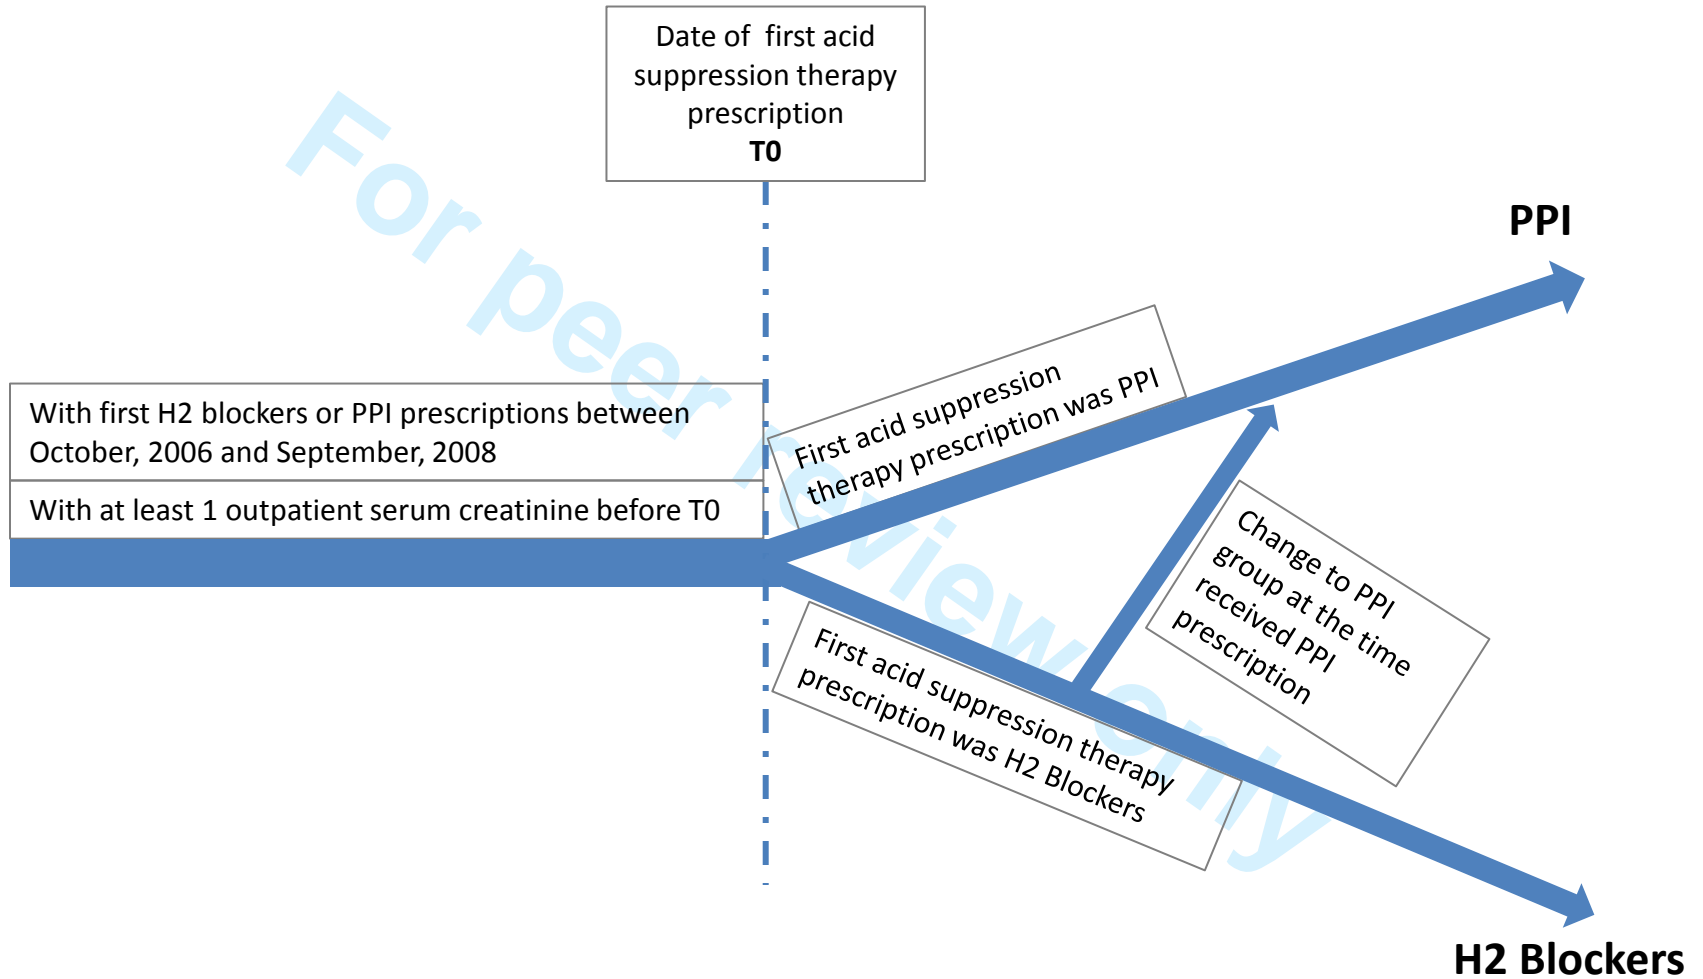

BMJ Open  
Supplemental Figure 2a

1  
2  
3  
4  
5  
6  
7  
8  
9  
10  
11  
12  
13  
14  
15  
16  
17  
18  
19  
20  
21  
22  
23  
24  
25  
26  
27  
28  
29  
30  
31  
32  
33  
34  
35  
36  
37  
38  
39  
40  
41  
42  
43

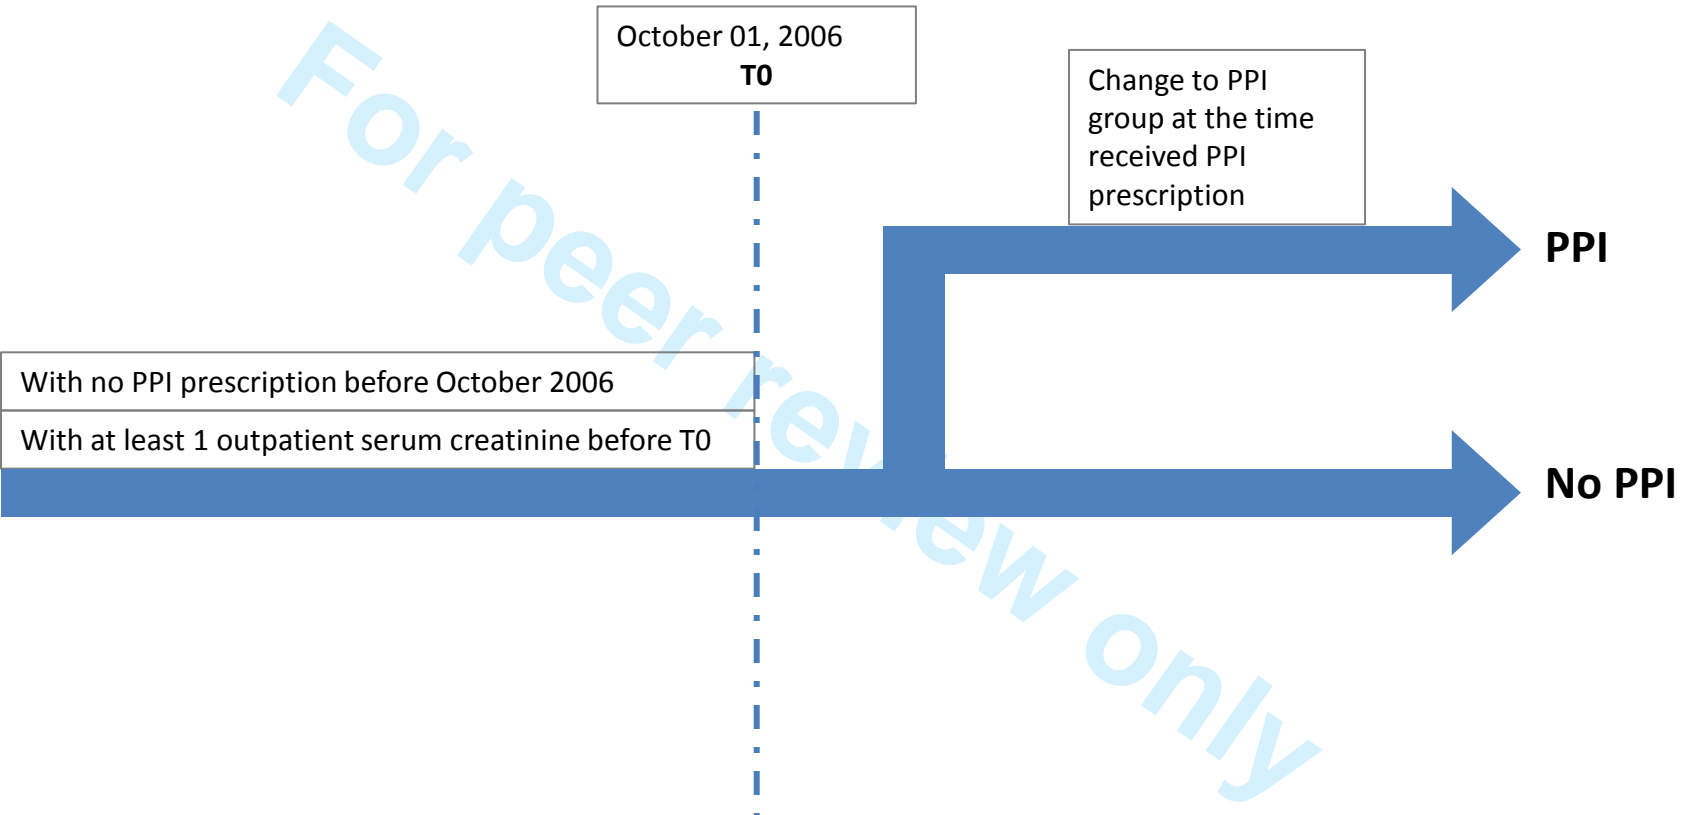

# Supplemental Figure 2b

1  
2  
3  
4  
5  
6  
7  
8  
9  
10  
11  
12  
13  
14  
15  
16  
17  
18  
19  
20  
21  
22  
23  
24  
25  
26  
27  
28  
29  
30  
31  
32  
33  
34  
35  
36  
37  
38  
39  
40  
41  
42  
43

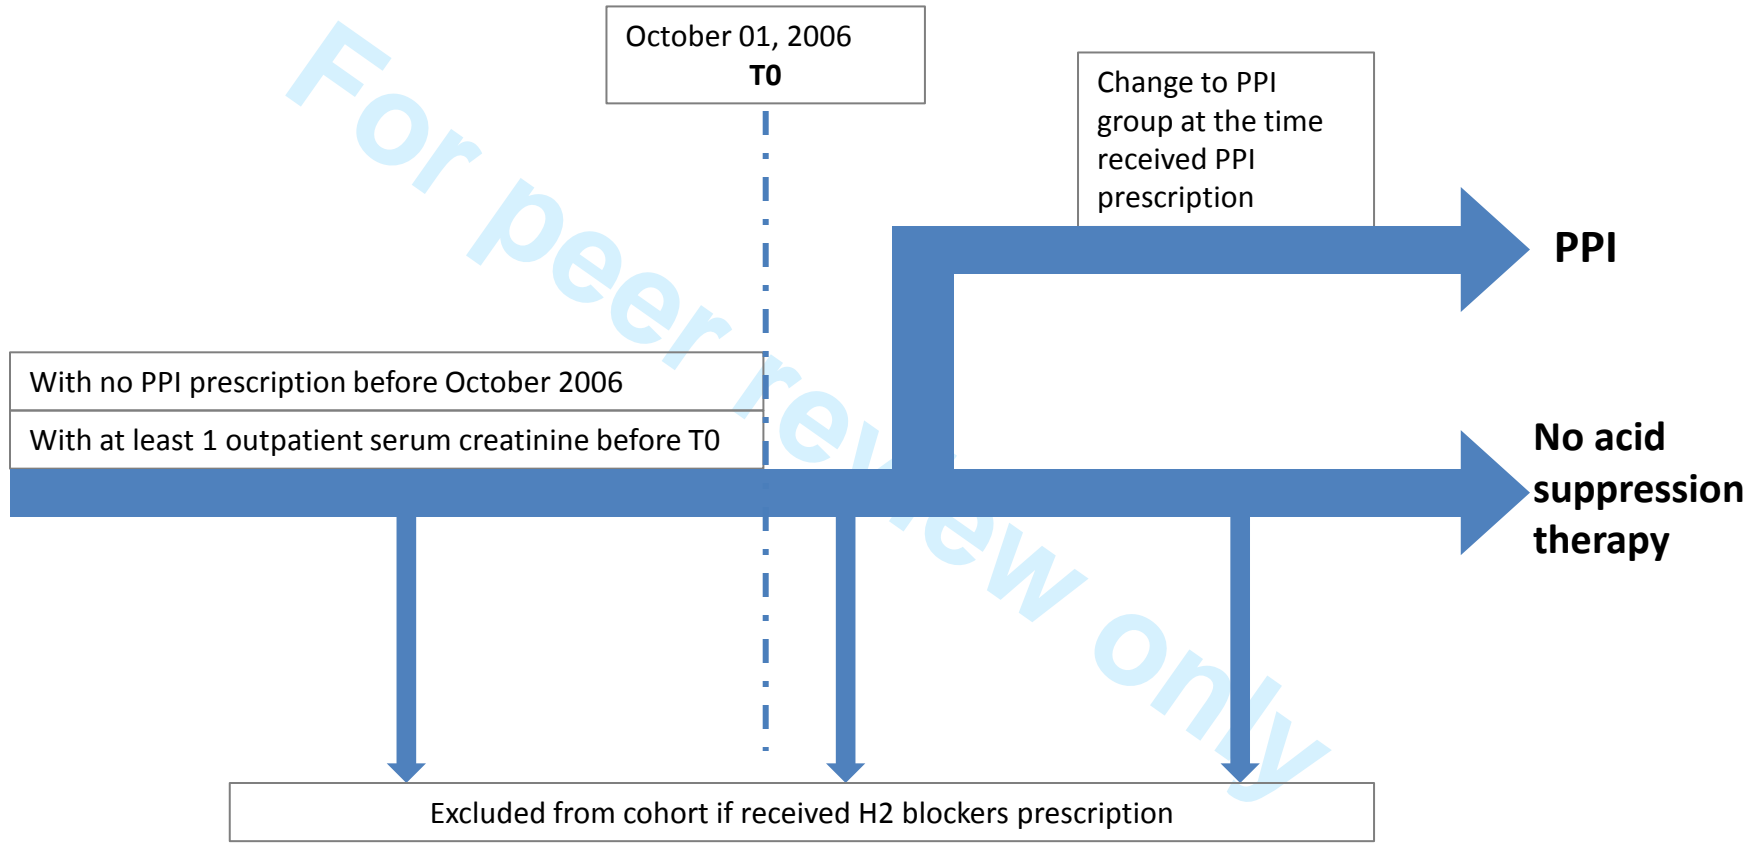

### Supplemental Figure 3

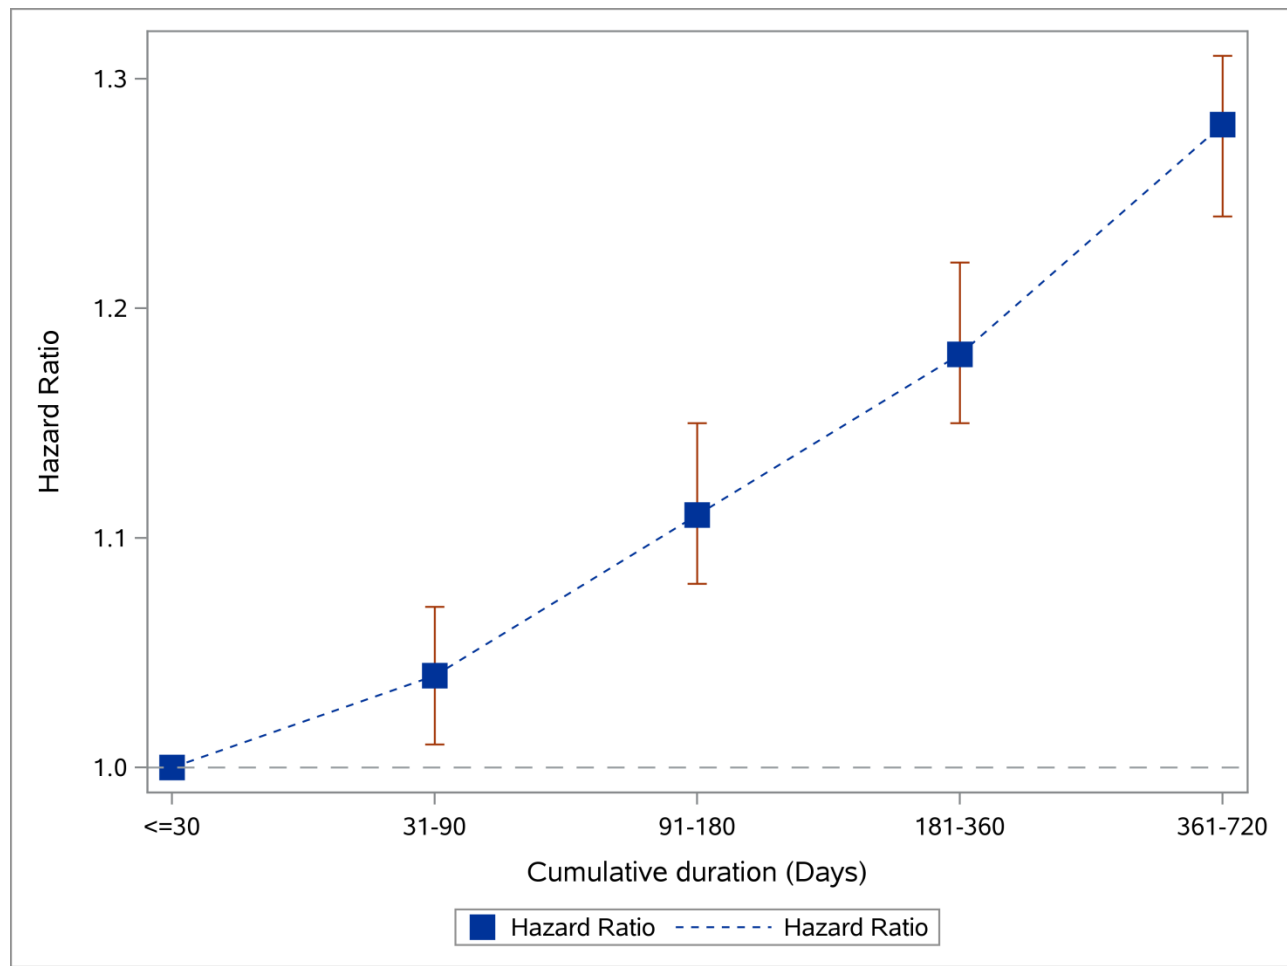



### Supplemental Figure 4

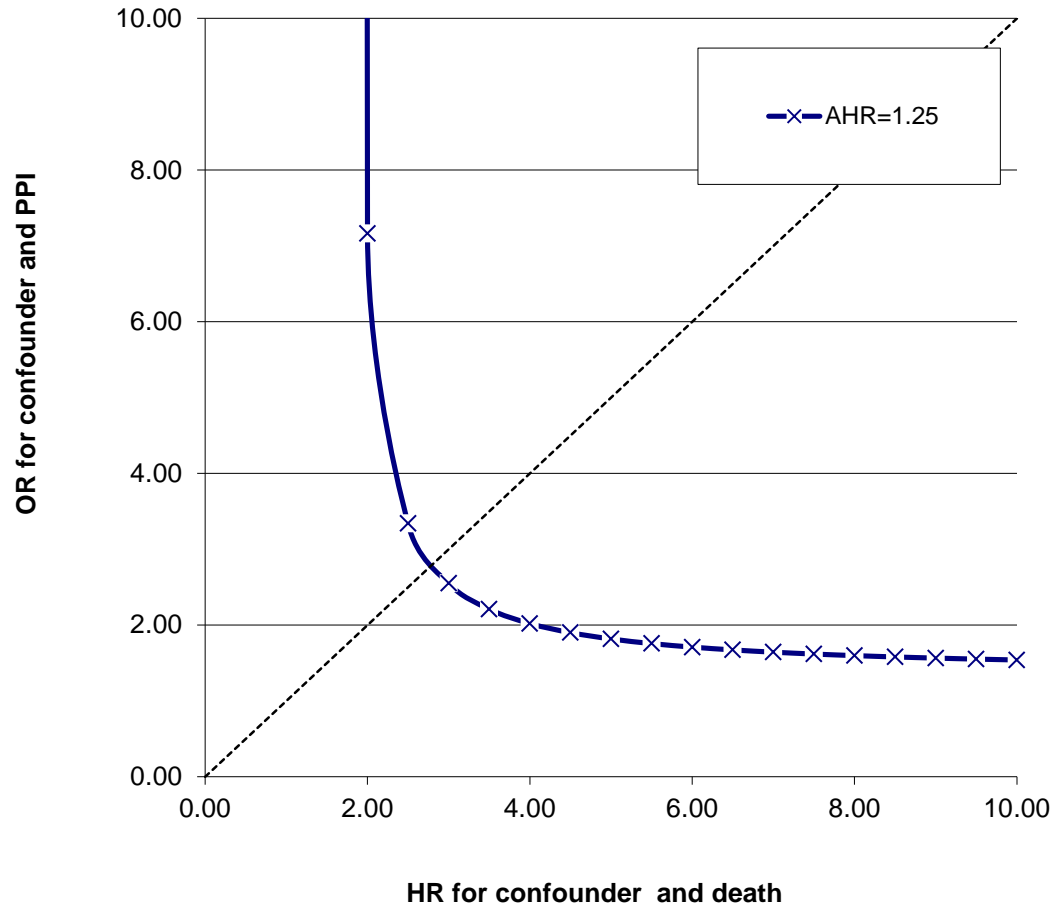

1  
2  
3  
4  
5  
6  
7  
8  
9  
10  
11  
12  
13  
14  
15  
16  
17  
18  
19  
20  
21  
22  
23  
24  
25  
26  
27  
28  
29  
30  
31  
32  
33  
34  
35  
36  
37  
38  
39  
40  
41  
42  
43

# BMJ Open Supplemental Figure 5

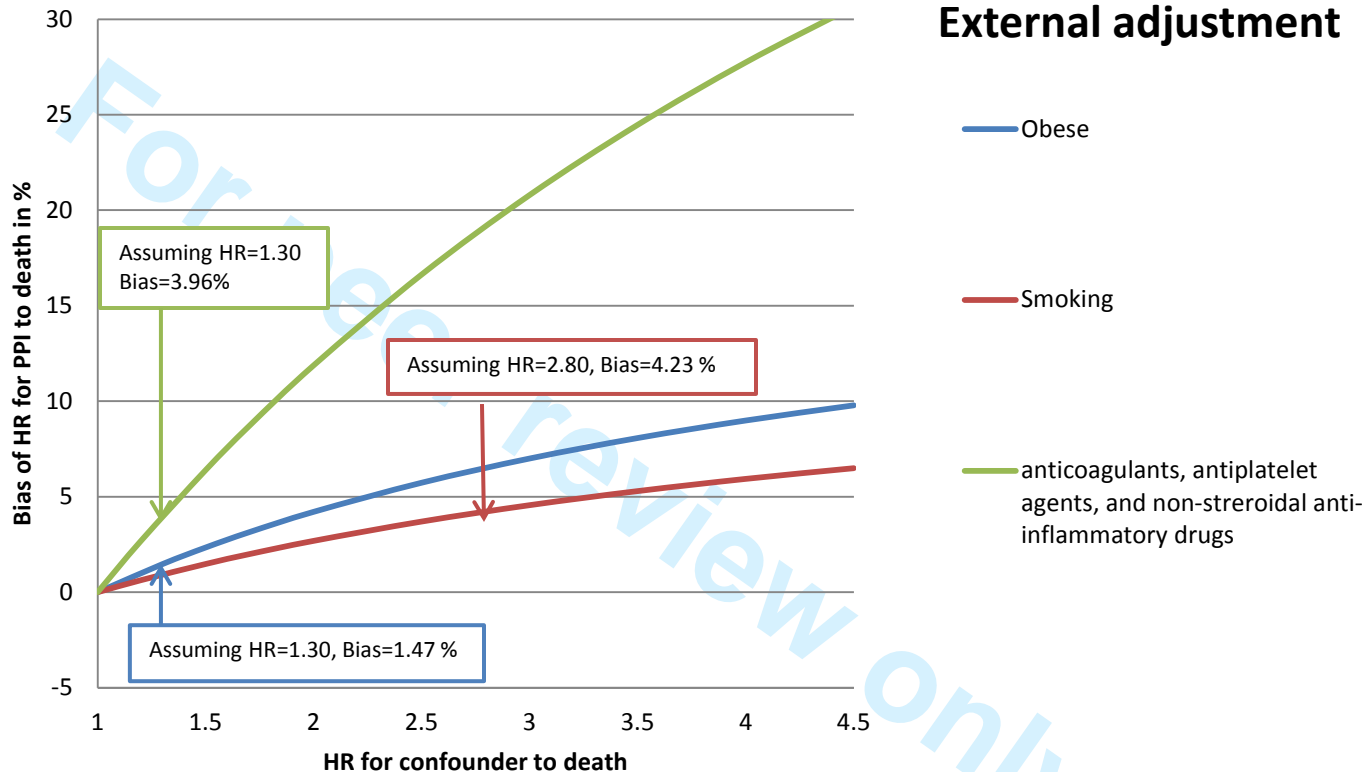

1  
2  
3  
4  
5  
6  
7  
8  
9  
10  
11  
12  
13  
14  
15  
16  
17  
18  
19  
20  
21  
22  
23  
24  
25  
26  
27  
28  
29  
30  
31  
32  
33  
34  
35  
36  
37  
38  
39  
40  
41  
42  
43

**Supplemental table 1:** Baseline demographic and health characteristics of the overall 2001 cohort of new users of acid suppression therapy, by type of acid suppressant at time of cohort entry, and those who were ever exposed to PPI.

|                                                         |            | Overall cohort | New users of H2 Blockers at time of cohort entry | New users of PPI at time of cohort entry | Ever exposed to PPI <sup>a</sup> | P Value <sup>b</sup> |
|---------------------------------------------------------|------------|----------------|--------------------------------------------------|------------------------------------------|----------------------------------|----------------------|
| N                                                       |            | 396884         | 208492                                           | 188392                                   | 293265                           |                      |
| Age (SD)                                                |            | 62.98 (13.05)  | 61.93 (13.24)                                    | 64.14 (12.74)                            | 63.78 (12.81)                    | <0.001               |
| eGFR in mL/min/1.73m <sup>2</sup> (SD)                  |            | 74.74 (22.43)  | 76.24 (22.04)                                    | 73.09 (22.73)                            | 73.38 (22.61)                    | <0.001               |
| Number of outpatient serum creatinine measurements (SD) |            | 3.01 (3.40)    | 2.95 (3.23)                                      | 3.06 (3.58)                              | 4.52 (5.51)                      | <0.001               |
| Number of hospitalizations (SD)                         |            | 0.37 (0.96)    | 0.36 (0.95)                                      | 0.38 (0.97)                              | 0.51 (1.30)                      | <0.001               |
| Race                                                    | White (%)  | 318534 (80.26) | 164295 (78.80)                                   | 154239 (81.87)                           | 236930 (80.79)                   | <0.001               |
|                                                         | Black (%)  | 58355 (14.70)  | 32053 (15.37)                                    | 26302 (13.96)                            | 42498 (14.49)                    |                      |
|                                                         | Other (%)  | 19995 (5.04)   | 12144 (5.82)                                     | 7851 (4.17)                              | 13837 (4.72)                     |                      |
| Sex                                                     | Male (%)   | 377769 (95.18) | 197685 (94.82)                                   | 180084 (95.59)                           | 279023 (95.14)                   | <0.001               |
|                                                         | Female (%) | 19115 (4.82)   | 10807 (5.18)                                     | 8308 (4.41)                              | 14242 (4.86)                     |                      |
| Diabetes mellitus (%)                                   |            | 92555 (23.32)  | 46562 (22.33)                                    | 45993 (24.41)                            | 74344 (25.35)                    | <0.001               |
| Hypertension (%)                                        |            | 231296 (58.28) | 119554 (57.34)                                   | 111742 (59.31)                           | 184529 (62.92)                   | <0.001               |
| Chronic lung disease (%)                                |            | 75810 (19.10)  | 39270 (18.84)                                    | 36540 (19.40)                            | 64254 (21.91)                    | <0.001               |
| Peripheral artery disease (%)                           |            | 9141 (2.30)    | 4646 (2.23)                                      | 4495 (2.39)                              | 8751 (2.98)                      | 0.001                |
| Cardiovascular disease (%)                              |            | 122301 (30.82) | 59814 (28.69)                                    | 62487 (33.17)                            | 101220 (34.51)                   | <0.001               |
| Cerebrovascular disease (%)                             |            | 1529 (0.39)    | 776 (0.37)                                       | 753 (0.40)                               | 1419 (0.48)                      | 0.16                 |
| Dementia (%)                                            |            | 12031 (3.03)   | 6094 (2.92)                                      | 5937 (3.15)                              | 10615 (3.62)                     | <0.001               |
| Hyperlipidemia (%)                                      |            | 152040 (38.31) | 78546 (37.67)                                    | 73494 (39.01)                            | 130557 (44.52)                   | <0.001               |
| Hepatitis C (%)                                         |            | 9332 (2.35)    | 4832 (2.32)                                      | 4500 (2.39)                              | 8456 (2.88)                      | 0.14                 |
| HIV (%)                                                 |            | 209 (0.05)     | 105 (0.05)                                       | 104 (0.06)                               | 183 (0.06)                       | 0.51                 |
| Cancer (%)                                              |            | 46451 (11.70)  | 23312 (11.18)                                    | 23139 (12.28)                            | 39473 (13.46)                    | <0.001               |
| GERD (%)                                                |            | 110217 (27.77) | 52586 (25.22)                                    | 57631 (30.59)                            | 114132 (38.92)                   | <0.001               |

|                                                            |                                  |                                    |                       |                       |        |
|------------------------------------------------------------|----------------------------------|------------------------------------|-----------------------|-----------------------|--------|
| Upper GI tract bleeding (%)                                | 11282 (2.84)                     | 3352 (1.61)                        | 7930 (4.21)           | 12458 (4.25)          | <0.001 |
| Ulcer disease (%)                                          | 35189 (8.87)                     | 14152 (6.79)                       | 21037 (11.17)         | 37472 (12.78)         | <0.001 |
| H. Pylori infection (%)                                    | 2599 (0.65)                      | 477 (0.23)                         | 2122 (1.13)           | 3795 (1.29)           | <0.001 |
| Barrett's esophagus (%)                                    | 0 (0.00)                         | 0 (0.00)                           | 0 (0.00)              | 245 (0.08)            | NA     |
| Achalasia (%)                                              | 188 (0.05)                       | 41 (0.02)                          | 147 (0.08)            | 245 (0.08)            | <0.001 |
| Stricture (%)                                              | 2218 (0.56)                      | 415 (0.20)                         | 1803 (0.96)           | 2953 (1.01)           | <0.001 |
| Esophageal adenocarcinoma (%)                              | 223 (0.06)                       | 79 (0.04)                          | 147 (0.08)            | 262 (0.09)            | <0.001 |
| Years of follow up (IQR) <sup>c</sup>                      | 5.65<br>(5.05 – 6.28)            | 3.35<br>(1.01 – 5.71) <sup>d</sup> | 5.51<br>(5.01 – 6.08) | 5.23<br>(3.22 – 5.90) | <0.001 |
| Days of having related prescription during follow-up (IQR) | 587<br>(168 – 1423) <sup>e</sup> | 188<br>(90 – 561) <sup>d</sup>     | 621<br>(171 – 1496)   | 579<br>(172 – 1350)   | <0.001 |
| Death (%)                                                  | 102802 (25.90)                   | 31260 (14.99) <sup>d</sup>         | 51785 (27.49)         | 71565 (24.40)         | <0.001 |
| Incident death in 100 person years (95% CI)                | 5.08<br>(5.05 – 5.11)            | 4.40<br>(4.35 – 4.45) <sup>d</sup> | 5.56<br>(5.51 – 5.61) | 5.45<br>(5.41 – 5.49) | <0.001 |

- Includes patients exposed to PPI at T0 (n=275977) and during follow-up (n=33136). Variables were measured at time of PPI exposure.
- P value for difference between exposed to H2 at T0 and exposed to PPI at T0
- From T0 to first occurrence of death or September 30, 2013
- Outcome measured from T0 to first occurrence of exposure PPI, death or September 30, 2007
- Days of having PPI or H2 blockers

Abbreviations: CI, Confidence interval; eGFR, estimated Glomerular Filtration Rate; GERD, Gastroesophageal Reflux Disease; HIV, human immunodeficiency virus; IQR, interquartile range; NA, Not Applicable; SD, Standard deviation

**Supplemental table 2:** Duration of exposure to PPI and risk of death among new users of PPI in the 2001 cohort (n=101,109)

| Duration (Days)                                                                                                                                                                                                                                                                                                                                                                                                                                                                                                                                                                            | ≤ 30             | 31 - 90              | 91 - 180             | 181 - 360            | 361 - 720            |
|--------------------------------------------------------------------------------------------------------------------------------------------------------------------------------------------------------------------------------------------------------------------------------------------------------------------------------------------------------------------------------------------------------------------------------------------------------------------------------------------------------------------------------------------------------------------------------------------|------------------|----------------------|----------------------|----------------------|----------------------|
| N (%)                                                                                                                                                                                                                                                                                                                                                                                                                                                                                                                                                                                      | 15204<br>(15.04) | 20409<br>(20.19)     | 17137<br>(16.95)     | 21586<br>(21.35)     | 26773<br>(26.48)     |
| Hazard Ratio (95%CI)                                                                                                                                                                                                                                                                                                                                                                                                                                                                                                                                                                       | 1                | 1.04<br>(1.01, 1.07) | 1.11<br>(1.08, 1.15) | 1.18<br>(1.15, 1.22) | 1.28<br>(1.24, 1.31) |
| <p>a. Within people exposure to PPI between 1 to 720 days</p> <p>b. Model controls for eGFR, age, race, gender, number of serum creatinine measurements, number of hospitalizations, diabetes mellitus, hypertension, cardiovascular disease, peripheral artery disease, cerebrovascular disease, chronic lung disease, hepatitis C, HIV, dementia, cancer, GERD, upper GI tract bleeding, ulcer disease, H. Pylori infection, Barrett's esophagus, achalasia, stricture and esophageal adenocarcinoma</p> <p>c. Time zero defined as date when the patients last PPI prescription end</p> |                  |                      |                      |                      |                      |

## Supplemental Methods:

### Time Dependent Propensity Score Matching

1. Using the primary cohort (N=349, 312), all covariates except for age, race and gender were treated as time-dependent variables from T0 till date of PPI use or end of follow up, whichever occurred first. Specifically, time-dependent eGFR indicated the eGFR at day t (where the value was equal to the outpatient eGFR measurement most close and prior to time t); time-dependent number of outpatient serum creatinine measurements and number of hospitalizations indicated the cumulative value from October 01, 1998 till day t; time-dependent disease status including diabetes mellitus, hypertension, cardiovascular disease, peripheral artery disease, cerebrovascular disease, chronic lung disease, cancer, hepatitis C, HIV, dementia and diseases associated with acid suppression therapy use such as gastroesophageal reflux disease (GERD), upper gastrointestinal (GI) tract bleeding, ulcer disease, H. Pylori infection, Barrett's esophagus, achalasia, stricture and esophageal adenocarcinoma indicated if participants were diagnosed with the disease between October 01, 1998 and day t.

2. Time-dependent Cox regression was applied, where time until receipt of first PPI prescription was the outcome (participants receiving PPI prescription at T0 were considered to have the event with survival time equal to 0 days). Time-dependent variables from step 1 and age, race and gender were used as predictors in the model in order to obtain parameter estimates for the predictors.

3. Every participant's hazard component at day t was computed based on the parameter estimates from step 2 and their covariate values at day t.

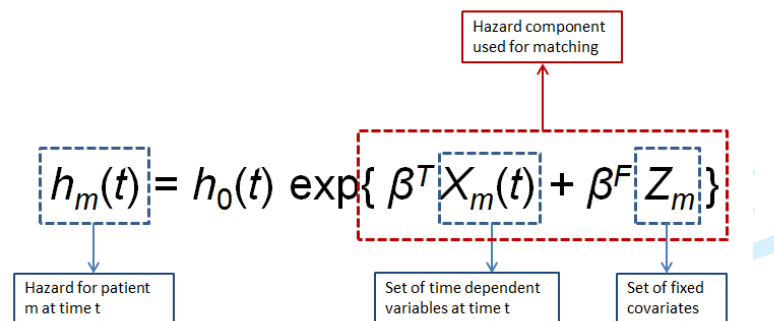

The hazard component was used as the time-dependent propensity score.

4. Beginning from T0 (day 0), a 1:1 sequential greedy matching without replacement was conducted. People who received PPI prescription at day t (case group at day t) were matched with people who had not yet received PPI prescription at day t (control group at day t) based on their propensity score at day

t. The order of both case and control groups was randomized before matching. A matched pair was considered successfully matched only if the propensity score difference was less than 0.2 times the standard deviation of the hazard component at time t. If no successful match was made the case in the pair was withdrawn from the further matching while the control was left in the data pool. Matching was ended when 1/ all participants in control or case group were matched or 2/ day t equaled day 1827.

5. After the matching, conditional Cox regressions stratified by matched pairs were conducted to examine the association between PPI and death.

#### **High-dimensional propensity score:**

1. Using the primary cohort (N=349,312), participants data from 1 year before T0 till T0 were collected in 5 dimensions consisting off: the first 3 digits of outpatient diagnoses ICD9 codes, the outpatient procedures CPT codes, the first 3 digits of inpatient diagnoses ICD9 codes, the first 3 digits of inpatient procedures ICD9 codes, and the outpatient drug names without dose.

2. Within each of the 5 dimensions, the top 300 most frequent items were selected, which yielded  $300 \times 5 = 1500$  potential items.

3. For each participant, we determined if each of the 1500 potential items 1\ ever occurred, 2\ if the number of occurrences for the participant was higher than the number of occurrences in 50% of the participants and 3\ if the number of occurrences for the participant was higher than the number of occurrences in 75% of the participants. This step results in  $1500 \times 3 = 4500$  binary potential variables. If the 50% or 75% percentile of the number of item occurrences was less than 1, then the variable were coded as 0 for all participants. If the 50% and 75% percentile of the number of item occurrences had the same value, then the 75% variable was coded as 0 for all participants.

4. Bias was calculated using formula based on apparent relative risk for each of the 4500 variables:

$$\text{Bias} = (P\_C1 (RR\_CD - 1) + 1) / (P\_C0 (RR\_CD - 1) + 1), \text{ if } RR\_CD \geq 1$$

$$\text{Bias} = (P\_C1 (1/RR\_CD - 1) + 1) / (P\_C0 (1/RR\_CD - 1) + 1), \text{ if } RR\_CD < 1$$

Where P\_C1 indicates the prevalence of the variable in the PPI group, P\_C0 indicates the prevalence of the variable in the control group, and RR\_CD indicate relative risk of death associated with the variable.

5. The top 500 variables with the largest  $|\log(\text{bias})|$  value were selected as binary empirical covariates for inclusion in the propensity score modeling.



1  
2  
3 6. The 500 variables and age, gender, race, and eGFR were used to obtain propensity scores from logistic  
4 regression where the outcome was receipt of PPI or not at T0. Propensity scores were then categorized  
5 into deciles.  
6  
7

8  
9  
10 7. Multivariate Cox regression with an indicator for propensity score decile was used to evaluate the  
11 association between PPI and death. Patients in the control group who received PPI later were censored  
12 at the time they received PPI.  
13

#### 14 15 16 17 **Two-stage residual inclusion estimation (Instrumental Variable):** 18

19  
20 1. Based on the primary cohort (N=349,312), for each participant, data on prescriptions by the physician  
21 who prescribed the participant the acid suppression therapy at T0 was collected from 6 months before  
22 the participant's T0 till T0.  
23

24  
25  
26 2. For each participant, the percentage of PPIs prescribed to new acid suppression therapy users by their  
27 prescribing physician, excluding the prescription of the participant, in the 6 months prior to and  
28 including T0 was computed and used as an instrumental variable. Participants whose prescribing  
29 physician did not prescribe any other acid suppression therapy to new users in the 6 months prior to and  
30 including T0 were excluded from the analysis.  
31  
32

33  
34  
35 3. In order to predict the participants' possibility of receiving PPI, instrumental variable and co-variables  
36 were used in a logistic regression model where the outcome was acid suppression therapy prescription  
37 at T0.  
38  
39

40  
41  
42 4. Residual terms were computed as the difference between participants' real probability ( 1 if PPI, 0 if  
43 H2 blocker) and predicted probability.  
44  
45

46  
47  
48 5. Multivariate Cox regression, which included the residual term and co-variables, were conducted to  
49 evaluate the relationship between PPI and death. Patients in the control group who received PPI later  
50 were censored at the time they received PPI.  
51  
52

## STROBE Statement—checklist of items that should be included in reports of observational studies

|                           | Item No | Recommendation                                                                                                                                                                                                                                                                                                                                                                                                                                                         | Reported Page                                               |
|---------------------------|---------|------------------------------------------------------------------------------------------------------------------------------------------------------------------------------------------------------------------------------------------------------------------------------------------------------------------------------------------------------------------------------------------------------------------------------------------------------------------------|-------------------------------------------------------------|
| <b>Title and abstract</b> | 1       | (a) Indicate the study's design with a commonly used term in the title or the abstract                                                                                                                                                                                                                                                                                                                                                                                 | 1                                                           |
|                           |         | (b) Provide in the abstract an informative and balanced summary of what was done and what was found                                                                                                                                                                                                                                                                                                                                                                    | 2                                                           |
| <b>Introduction</b>       |         |                                                                                                                                                                                                                                                                                                                                                                                                                                                                        |                                                             |
| Background/rationale      | 2       | Explain the scientific background and rationale for the investigation being reported                                                                                                                                                                                                                                                                                                                                                                                   | 3                                                           |
| Objectives                | 3       | State specific objectives, including any prespecified hypotheses                                                                                                                                                                                                                                                                                                                                                                                                       | 3-4                                                         |
| <b>Methods</b>            |         |                                                                                                                                                                                                                                                                                                                                                                                                                                                                        |                                                             |
| Study design              | 4       | Present key elements of study design early in the paper                                                                                                                                                                                                                                                                                                                                                                                                                | 4                                                           |
| Setting                   | 5       | Describe the setting, locations, and relevant dates, including periods of recruitment, exposure, follow-up, and data collection                                                                                                                                                                                                                                                                                                                                        | 4                                                           |
| Participants              | 6       | (a) <i>Cohort study</i> —Give the eligibility criteria, and the sources and methods of selection of participants. Describe methods of follow-up<br><i>Case-control study</i> —Give the eligibility criteria, and the sources and methods of case ascertainment and control selection. Give the rationale for the choice of cases and controls<br><i>Cross-sectional study</i> —Give the eligibility criteria, and the sources and methods of selection of participants | 4-5                                                         |
|                           |         | (b) <i>Cohort study</i> —For matched studies, give matching criteria and number of exposed and unexposed<br><i>Case-control study</i> —For matched studies, give matching criteria and the number of controls per case                                                                                                                                                                                                                                                 | Additional matched cohort described in Supplemental methods |
| Variables                 | 7       | Clearly define all outcomes, exposures, predictors, potential confounders, and effect modifiers. Give diagnostic criteria, if applicable                                                                                                                                                                                                                                                                                                                               | 5-6                                                         |
| Data sources/measurement  | 8*      | For each variable of interest, give sources of data and details of methods of assessment (measurement). Describe comparability of assessment methods if there is more than one group                                                                                                                                                                                                                                                                                   | 5-6                                                         |
| Bias                      | 9       | Describe any efforts to address potential sources of bias                                                                                                                                                                                                                                                                                                                                                                                                              | 7                                                           |
| Study size                | 10      | Explain how the study size was arrived at                                                                                                                                                                                                                                                                                                                                                                                                                              | 4                                                           |
| Quantitative variables    | 11      | Explain how quantitative variables were handled in the analyses. If applicable, describe which groupings were chosen and why                                                                                                                                                                                                                                                                                                                                           | 6                                                           |
| Statistical methods       | 12      | (a) Describe all statistical methods, including those used to control for confounding                                                                                                                                                                                                                                                                                                                                                                                  | 6-7 and Supplemental methods                                |
|                           |         | (b) Describe any methods used to examine subgroups and interactions                                                                                                                                                                                                                                                                                                                                                                                                    | 6                                                           |
|                           |         | (c) Explain how missing data were addressed                                                                                                                                                                                                                                                                                                                                                                                                                            | 7                                                           |
|                           |         | (d) <i>Cohort study</i> —If applicable, explain how loss to follow-up was addressed<br><i>Case-control study</i> —If applicable, explain how matching of cases and controls was addressed                                                                                                                                                                                                                                                                              | Due to the feature of VA data on death                      |

|  |  |                                                                                                              |                                                                                                                   |
|--|--|--------------------------------------------------------------------------------------------------------------|-------------------------------------------------------------------------------------------------------------------|
|  |  | <i>Cross-sectional study</i> —If applicable, describe analytical methods taking account of sampling strategy | information, no loss of follow-up would occur. All death data is captured by the Veterans Benefit Administration. |
|  |  | (e) Describe any sensitivity analyses                                                                        | 7-8                                                                                                               |

| Results                  |     |                                                                                                                                                                                                              | Reported Page            |
|--------------------------|-----|--------------------------------------------------------------------------------------------------------------------------------------------------------------------------------------------------------------|--------------------------|
| Participants             | 13* | (a) Report numbers of individuals at each stage of study—eg numbers potentially eligible, examined for eligibility, confirmed eligible, included in the study, completing follow-up, and analysed            | 4-5                      |
|                          |     | (b) Give reasons for non-participation at each stage                                                                                                                                                         | N/A                      |
|                          |     | (c) Consider use of a flow diagram                                                                                                                                                                           | N/A                      |
| Descriptive data         | 14* | (a) Give characteristics of study participants (eg demographic, clinical, social) and information on exposures and potential confounders                                                                     | 19-20<br>Table 1         |
|                          |     | (b) Indicate number of participants with missing data for each variable of interest                                                                                                                          | see page 7<br>for reason |
|                          |     | (c) <i>Cohort study</i> —Summarise follow-up time (eg, average and total amount)                                                                                                                             | 20 Table 1               |
| Outcome data             | 15* | <i>Cohort study</i> —Report numbers of outcome events or summary measures over time                                                                                                                          | 19 Table 1               |
|                          |     | <i>Case-control study</i> —Report numbers in each exposure category, or summary measures of exposure                                                                                                         | N/A                      |
|                          |     | <i>Cross-sectional study</i> —Report numbers of outcome events or summary measures                                                                                                                           | N/A                      |
| Main results             | 16  | (a) Give unadjusted estimates and, if applicable, confounder-adjusted estimates and their precision (eg, 95% confidence interval). Make clear which confounders were adjusted for and why they were included | 21-22<br>Table 2         |
|                          |     | (b) Report category boundaries when continuous variables were categorized                                                                                                                                    | N/A                      |
|                          |     | (c) If relevant, consider translating estimates of relative risk into absolute risk for a meaningful time period                                                                                             | N/A                      |
| Other analyses           | 17  | Report other analyses done—eg analyses of subgroups and interactions, and sensitivity analyses                                                                                                               | 9-10                     |
| <b>Discussion</b>        |     |                                                                                                                                                                                                              |                          |
| Key results              | 18  | Summarise key results with reference to study objectives                                                                                                                                                     | 12                       |
| Limitations              | 19  | Discuss limitations of the study, taking into account sources of potential bias or imprecision. Discuss both direction and magnitude of any potential bias                                                   | 13                       |
| Interpretation           | 20  | Give a cautious overall interpretation of results considering objectives, limitations, multiplicity of analyses, results from similar studies, and other relevant evidence                                   | 12-13                    |
| Generalisability         | 21  | Discuss the generalisability (external validity) of the study results                                                                                                                                        | 12                       |
| <b>Other information</b> |     |                                                                                                                                                                                                              |                          |
| Funding                  | 22  | Give the source of funding and the role of the funders for the present study and, if                                                                                                                         | 15                       |

|  |                                                                          |  |
|--|--------------------------------------------------------------------------|--|
|  | applicable, for the original study on which the present article is based |  |
|--|--------------------------------------------------------------------------|--|

\*Give information separately for cases and controls in case-control studies and, if applicable, for exposed and unexposed groups in cohort and cross-sectional studies.

**Note:** An Explanation and Elaboration article discusses each checklist item and gives methodological background and published examples of transparent reporting. The STROBE checklist is best used in conjunction with this article (freely available on the Web sites of PLoS Medicine at <http://www.plosmedicine.org/>, Annals of Internal Medicine at <http://www.annals.org/>, and Epidemiology at <http://www.epidem.com/>). Information on the STROBE Initiative is available at [www.strobe-statement.org](http://www.strobe-statement.org).

For peer review only

# BMJ Open

## Excess Risk of Death among Users of Proton Pump Inhibitors: A longitudinal observational cohort study of United States Veterans

|                                 |                                                                                                                                                                                                                                                                                                                                                                                                                                                                                                                                                                                                                                                                                                                                                                                                                    |
|---------------------------------|--------------------------------------------------------------------------------------------------------------------------------------------------------------------------------------------------------------------------------------------------------------------------------------------------------------------------------------------------------------------------------------------------------------------------------------------------------------------------------------------------------------------------------------------------------------------------------------------------------------------------------------------------------------------------------------------------------------------------------------------------------------------------------------------------------------------|
| Journal:                        | <i>BMJ Open</i>                                                                                                                                                                                                                                                                                                                                                                                                                                                                                                                                                                                                                                                                                                                                                                                                    |
| Manuscript ID                   | bmjopen-2016-015735.R2                                                                                                                                                                                                                                                                                                                                                                                                                                                                                                                                                                                                                                                                                                                                                                                             |
| Article Type:                   | Research                                                                                                                                                                                                                                                                                                                                                                                                                                                                                                                                                                                                                                                                                                                                                                                                           |
| Date Submitted by the Author:   | 20-Mar-2017                                                                                                                                                                                                                                                                                                                                                                                                                                                                                                                                                                                                                                                                                                                                                                                                        |
| Complete List of Authors:       | Xie, Yan; VA Saint Louis Health Care System, Clinical Epidemiology Center<br>Bowe, Benjamin; VA Saint Louis Health Care System, Clinical Epidemiology Center<br>Li, Tingting; VA Saint Louis Health Care System, Clinical Epidemiology Center; Washington University in Saint Louis School of Medicine, Internal Medicine<br>Xian, Hong; VA Saint Louis Health Care System, Clinical Epidemiology Center; Saint Louis University, School of Public Health, Department of Biostatistics<br>Yan, Yan; VA Saint Louis Health Care System, Clinical Epidemiology Center; Washington University in Saint Louis School of Medicine, Public Health Sciences<br>Al-Aly, Ziyad; VA Saint Louis Health Care System, Clinical Epidemiology Center; Washington University in Saint Louis School of Medicine, Internal Medicine |
| <b>Primary Subject Heading</b>: | Public health                                                                                                                                                                                                                                                                                                                                                                                                                                                                                                                                                                                                                                                                                                                                                                                                      |
| Secondary Subject Heading:      | Epidemiology, Pharmacology and therapeutics, Public health, Gastroenterology and hepatology                                                                                                                                                                                                                                                                                                                                                                                                                                                                                                                                                                                                                                                                                                                        |
| Keywords:                       | CLINICAL PHARMACOLOGY, EPIDEMIOLOGY, Gastroduodenal disease < GASTROENTEROLOGY, Health & safety < HEALTH SERVICES ADMINISTRATION & MANAGEMENT, PUBLIC HEALTH, Adverse events < THERAPEUTICS                                                                                                                                                                                                                                                                                                                                                                                                                                                                                                                                                                                                                        |
|                                 |                                                                                                                                                                                                                                                                                                                                                                                                                                                                                                                                                                                                                                                                                                                                                                                                                    |

SCHOLARONE™  
Manuscripts

**Excess Risk of Death among Users of Proton Pump Inhibitors:  
A longitudinal observational cohort study of United States Veterans**

**Yan Xie MPH<sup>1</sup>, Benjamin Bowe MPH<sup>1</sup>, Tingting Li MD<sup>1,2</sup>, Hong Xian PhD<sup>1,3</sup>, Yan Yan MD, PhD<sup>1,4</sup>,  
and Ziyad Al-Aly MD<sup>1,2,5,6</sup>**

<sup>1</sup>Clinical Epidemiology Center, Research and Education Service, VA Saint Louis Health Care System,  
Saint Louis, Missouri

<sup>2</sup>Department of Medicine, Washington University School of Medicine, Saint Louis, Missouri

<sup>3</sup>Department of Biostatistics, College for Public Health and Social Justice, Saint Louis University,  
Saint Louis, Missouri

<sup>4</sup>Division of Public Health Sciences, Department of Surgery, Washington University School of Medicine,  
Saint Louis, Missouri

<sup>5</sup>Renal Section, Medicine Service, VA Saint Louis Health Care System,  
Saint Louis, Missouri

<sup>6</sup>Institute for Public Health, Washington University School of Medicine, Saint Louis, Missouri

**Running title: PPI and mortality**

**Word count for abstract: 283**

**Word count for text: 3705**

**Corresponding Author:**

Ziyad Al-Aly, M.D.  
Clinical Epidemiology Center  
VA Saint Louis Health Care System  
915 North Grand Boulevard, 151-JC  
Saint Louis, MO 63106  
Telephone: (314) 289-6333  
E-mail: [zalaly@gmail.com](mailto:zalaly@gmail.com)

**Abstract:**

**Objective:** Proton pump inhibitors (PPI) are widely used; and their use is associated with increased risk of adverse events. However, whether PPI use is associated with excess risk of death is unknown. We aimed to examine the association between PPI use and risk of all-cause mortality.

**Design:** Longitudinal observational cohort study

**Setting:** US Department of Veterans Affairs

**Participants:** Primary cohort of new users of PPI or Histamine H2 receptor antagonists (H2 blockers) (N=349,312); additional cohorts included PPI versus no PPI (N=3,288,092), and PPI versus no PPI and no H2 blockers (N=2,887,030).

**Main outcome measures:** Risk of death.

**Results:** Over a median follow-up of 5.71 years (IQR: 5.11-6.37), PPI use was associated with increased risk of death compared to H2 blockers use (HR=1.25; CI=1.23-1.28). Risk of death associated with PPI use was higher in analyses adjusted for high-dimensional propensity score (HR=1.16; CI=1.13-1.18); two-stage residual inclusion estimation (HR=1.21; CI=1.16-1.26); and in 1:1 time-dependent propensity score matched cohort (HR=1.34 CI=1.29-1.39). The risk of death was increased when considering PPI use versus no PPI (HR=1.15; CI=1.14-1.15), and PPI use versus no PPI and no H2 blockers (HR= 1.23; CI=1.22-1.24). Risk of death associated with PPI use was increased among participants without gastrointestinal conditions: PPI versus H2 blockers (HR=1.24; CI=1.21-1.27); PPI use versus no PPI (HR=1.19; CI=1.18-1.20); and PPI use versus no PPI and no H2 blockers (HR=1.22; CI=1.21-1.23). Among new PPI users, there was a graded association between duration of exposure and risk of death.

**Conclusions:** The results suggest excess risk of death among PPI users; risk is also increased among those without gastrointestinal conditions and with prolonged duration of use. Limiting PPI use and duration to instances where it is medically indicated may be warranted.



**Strength and limitations:**

- National large scale data from a network of integrated health systems
- Employed a new user design and developed a number of analytical approaches where we consistently found a significant association between PPI exposure and risk of death.
- Cohort included mostly older white male US Veterans which may limit the generalizability.
- Did not include information on the cause of death.

**Introduction:**

Proton pump inhibitors (PPI) are widely prescribed and are also available for sale over the counter without prescription in several countries(1, 2). Several observational studies suggest that PPI use is associated with increased risk of a number of adverse health outcomes(1). A number of studies have shown that PPI use is associated with significant risk of acute interstitial nephritis(3-5). Recent studies established an association between exposure to PPI and risk of chronic kidney disease (CKD), kidney disease progression, and end stage renal disease (ESRD)(2, 6, 7). Results from a large prospective observational German cohort suggest that patients receiving PPI had a higher risk of incident dementia(8). Several reports highlighted a rare but potentially fatal risk of hypomagnesemia among users of PPI(9-11). PPI use has been associated with increased risk of both incident and recurrent *Clostridium difficile* infections(12). Several observational analyses have shown that PPI use was also associated with increased risk of osteoporotic fractures including hip and spine fractures(13, 14). Less convincing -and to some extent inconsistent- evidence suggests a relationship between PPI use and risks of community acquired pneumonia and cardiovascular events(15-17). Emerging - and far from conclusive- *in vitro* evidence suggests that PPI results in inhibition of lysosomal acidification and impairment of proteostasis leading to increased oxidative stress, endothelial dysfunction, telomere shortening and accelerated senescence in human endothelial cells(18). The experimental work provides a putative mechanistic link to explain some of the adverse events associated with PPI use(18).

The adverse outcomes associated with PPI use are serious and each is independently associated with higher risk of mortality. Evidence from several small cohort studies of older adults who were recently discharged from the hospital, or institutionalized in long term care facilities suggests inconsistently that PPI use may be associated with increased risk of 1-year mortality(19-22). Whether PPI use is associated with excess risk of

1 death is not known and has not been examined in large epidemiologic studies spanning a sufficiently long  
2 duration of follow up. We hypothesized that owing to the consistently observed associations between PPI use  
3 and risk of adverse health outcomes, PPI use is associated with excess risk of death, and that the risk of death  
4 would be more pronounced with increased duration of use. We therefore used the Department of Veterans  
5 Affairs national databases to build a longitudinal cohort of incident users of acid suppression therapy including  
6 PPI and Histamine H2 receptor antagonists (H2 blockers) to examine the association between PPI use and risk  
7 of all-cause mortality, and to determine whether risk of death is increased with prolonged duration of use.  
8  
9  
10  
11  
12  
13  
14  
15  
16  
17

## 18 **Methods:**

### 19 **Cohort participants:**

#### 20 **Primary cohort:**

21  
22 Using administrative data from the United States Department of Veterans Affairs (VA), we identified patients  
23 who received an outpatient H2 blockers or PPI prescription between October 01, 2006 and September 30,  
24 2008 (n=1,762,908). In order to select new users of acid suppression therapy (incident user design), we  
25 excluded 1,356,948 patients who received any outpatient H2 blockers or PPI prescriptions between October 01,  
26 1998 and September 30, 2006. To account for patients' kidney function, only patients with at least one  
27 outpatient serum creatinine value before first acid suppression therapy prescription were selected in the cohort,  
28 yielding an analytic cohort of 349,312 patients. Patients whose first acid suppression therapy was PPI  
29 (n=275,977) were considered to be in the PPI group during follow-up. Patients who received H2 blockers as  
30 their first acid suppression therapy (n=73,335) served as the reference group before they received any PPI  
31 prescription. (Supplemental figure 1) Within the reference group, those who received a PPI prescription later  
32 (n=33,136) were considered to be in the PPI group from the date of their first PPI prescription until the end of  
33 follow-up(23). Time zero (T0) for primary cohort was defined as first acid suppression therapy prescription date.  
34  
35  
36  
37  
38  
39  
40  
41  
42  
43  
44  
45  
46  
47  
48  
49  
50  
51

#### 52 **Secondary cohorts:**

53 We additionally built two secondary cohorts to examine the association of PPI use and risk of death in a) PPI  
54 versus no PPI users, and b) PPI versus non users of acid suppression therapy. Patients with no PPI  
55 prescription between October 01, 1998 and September 30, 2006, and with at least one outpatient eGFR value  
56  
57  
58  
59  
60

1 before October 01, 2006 were selected to evaluate the risk of death associated with PPI use versus no PPI  
2 use (n=3,288,092) (Supplemental figure 2a). Patients with no PPI prescription between October 01, 1998 and  
3 September 30, 2006, with no H2 blockers before first PPI prescription and at least one outpatient eGFR value  
4 before October 01, 2006 were selected to evaluate the risk of death associated with PPI use versus no acid  
5 suppression therapy (n=2,887,030) (Supplemental figure 2b). T0 for secondary cohorts was defined as  
6 October 01, 2006.  
7  
8  
9  
10  
11  
12

13  
14  
15 Patients in both primary and secondary cohorts were followed until September 30, 2013 or death. The study  
16 was approved by the Institutional Review Board of the VA Saint Louis Health Care System, Saint Louis, MO.  
17  
18  
19

### 20 21 22 **Data Sources:**

23  
24 We used the Department of Veterans Affairs databases including inpatient and outpatient medical SAS  
25 datasets (that include utilization data related to all inpatient and outpatient encounters within the VA system) to  
26 ascertain detailed patient demographic characteristics and comorbidity information based on inpatient and  
27 outpatient encounters(2, 24). The VA Managerial Cost Accounting System Laboratory Results (a  
28 comprehensive database that includes VA-wide results for selected laboratory tests obtained in the clinical  
29 setting) provided information on outpatient and inpatient laboratory results. The VA Corporate Data Warehouse  
30 Production Outpatient Pharmacy domain provided information on outpatient prescriptions. The VA Vital Status  
31 and Beneficiary Identification Records Locator Subsystem (BIRLS) files provided demographic characteristics  
32 and death.  
33  
34  
35  
36  
37  
38  
39  
40  
41  
42  
43  
44  
45

46 **Primary Predictor Variable:** PPI use was the primary predictor. Once cohort participants received PPI  
47 prescription, they were considered with effect of PPI until the end of follow up. Medications that contain  
48 esomeprazole, lansoprazole, omeprazole, pantoprazole or rabeprazole were counted as PPI. Medications  
49 including ranitidine, cimetidine, and famotidine were counted as H2 blockers.  
50  
51  
52  
53  
54  
55

56 **Outcome:** The primary outcome in survival analyses was time to death. Death information is routinely  
57 collected by the Veterans Benefit Administration for all United States Veterans.  
58  
59  
60

**Covariates:**

Covariates included age, race, gender, eGFR, number of outpatient serum creatinine measurements, number of hospitalizations, diabetes mellitus, hypertension, cardiovascular disease, peripheral artery disease, cerebrovascular disease, chronic lung disease, cancer, hepatitis C, HIV, dementia and diseases associated with acid suppression therapy use such as gastroesophageal reflux disease (GERD), upper gastrointestinal (GI) tract bleeding, ulcer disease, H. Pylori infection, Barrett's esophagus, achalasia, stricture and esophageal adenocarcinoma(25-28). eGFR was calculated using the abbreviated four-variable Chronic Kidney Disease Epidemiology Collaboration equation based on age, sex, race, and outpatient serum creatinine(29). Race/ethnicity was categorized as white, black, or other (Latino, Asian, Native American, or other racial/ethnic minority groups). Comorbidities except for hepatitis C and HIV were assigned on the basis of relevant ICD-9-CM diagnostic and procedures codes and CPT codes in the VA Medical SAS datasets(2, 30-33). Hepatitis C and HIV were assigned based on laboratory results.

Baseline covariates were ascertained from October 01, 1998 till T0. All covariates except for age, race and gender covariates values were treated as time-varying covariates where they were additionally assessed until date of first PPI prescription in those patients who did not have PPI prescription at T0. Any comorbidity occurring during the assessment period was considered present during the remaining follow-up. eGFR was the outpatient eGFR value within and most proximate to the end of the assessment period. Number of outpatient serum creatinine measurements and number of hospitalizations were accumulated during the assessment period.

**Statistical Analysis:**

Means, standard deviations and t-tests are presented for normally distributed continuous variables; medians, interquartile ranges and Wilcoxon-Mann-Whitney tests are presented for non-normally distributed continuous variables; counts, percentages and Chi-square tests are presented for categorical variables. Incident rates per 100 person-years were computed for death and confidence intervals were estimated based on the normal distribution. Simon and Makuch method for survival curves was used for time-dependent covariates(34).

1 Cox regression models with time-dependent covariates were used in the assessment of the association  
2 between PPI exposure and risk of death where patients could switch from H2 blockers to PPI in the models. In  
3 order to account for potential delayed effect of PPI, patients were considered to have the effect of PPI from the  
4 first PPI prescription till end of follow up. In addition, time dependent Cox models were conducted in subgroups  
5 where patients had no GI conditions, and where patients had no GI conditions except for GERD.  
6  
7  
8  
9

10  
11  
12  
13 Because exposure in this observational cohort is time-dependent, we undertook 1:1 propensity score matching  
14 for the primary cohort where time-dependent propensity scores were calculated based on time-dependent Cox  
15 regression with all covariates(35)(details are provided in supplemental methods). After matching, all covariates  
16 except for age had an absolute standardized difference of less than 0.1, which indicated all covariates except  
17 for age were well balanced. Age had a standardized difference equal to 0.13. Doubly robust estimation was  
18 applied after matching, where all covariates were additionally controlled for in the model, to obtain an unbiased  
19 effect estimator(36).  
20  
21  
22  
23  
24  
25  
26  
27  
28  
29

30 In order to optimize control of confounding, we additionally built high-dimensional propensity score adjusted  
31 survival models following the multistep algorithm described by Schneeweiss et al(37)(details are provided in  
32 supplemental methods). We also applied two-stage residual inclusion estimation based on instrumental  
33 variable approach (Supplemental methods)(38).  
34  
35  
36  
37  
38  
39  
40

41 In addition, we evaluated the association between duration of PPI prescription and risk of death among new  
42 users of PPI. Duration was defined in cumulative days of use and categorized as  $\leq 30$ , 31-90, 91-180, 181-360,  
43 361-720, where  $\leq 30$  days considered as the reference group. To avoid immortal time bias (by definition, cohort  
44 participants must be alive to receive prescription hence introducing a bias commonly referred to as immortal  
45 time bias), time of cohort entry was defined as the date of last PPI prescription plus days' supply (39, 40). In  
46 order to ensure sufficient length of follow up time following T0, we excluded cohort participants with cumulative  
47 duration of exposure exceeding 720 days (because of limited overall cohort timeline, and because T0 starts at  
48 the end of last prescription, those with long exposure will necessarily have limited follow up time). In  
49  
50  
51  
52  
53  
54  
55  
56  
57  
58  
59  
60

1 regression analyses, a 95% confidence interval (CI) of a hazard ratio (HR) that does not include unity was  
2 considered statistically significant. All analyses were performed using SAS Enterprise Guide version 7.1.  
3  
4  
5

### 6 **Sensitivity Analysis:**

7  
8 In order to further evaluate the consistency and robustness of study findings, we examined the observed  
9 associations in a less contemporary cohort (dating back to an era where PPI prescription and use were far less  
10 frequent) of patients without acid suppression therapy prescriptions between October 01, 1998 and September  
11 30, 2000 (washout period) and with acid suppression therapy prescription between October 01, 2000 and  
12 September 30, 2002 and at least one outpatient serum creatinine value before that. Patients in this cohort were  
13 followed till September 30, 2007 or death. To examine the impact of potential residual confounding on study  
14 results, we conducted additional sensitivity analyses as described by Schneeweiss(41): a) we used the rule-out  
15 approach to identify the strength of the residual confounding that could fully explain the association observed in  
16 primary analyses; and b) applied an external adjustment approach using external information (prevalence and  
17 risk estimates from published literature) to evaluate potential net confounding bias due to unmeasured  
18 confounders(2, 41-44). Methods are described elegantly by Schneeweiss(41). In addition, to remove death  
19 events that were less likely to be related to PPI exposure, we excluded cohort participants who died within 90  
20 days after first PPI or H2 blockers prescription.  
21  
22  
23  
24  
25  
26  
27  
28  
29  
30  
31  
32  
33  
34  
35  
36  
37

38 We conducted analyses based on a three level classification of exposure, where patient's status at time t could  
39 be current use (using PPI or finished last PPI prescription within 90 days before t), past use (used PPI after T<sub>0</sub>  
40 but finished more than 90 days before t), and never use. We conducted additional sensitivity analyses which  
41 included hemoglobin as a covariate in cohort participants with available data. We also undertook analyses  
42 which stratified the cohort based on cardiovascular disease, history of pneumonia, chronic kidney disease  
43 (eGFR<60 and ≥60 mL/min/1.73m<sup>2</sup>) or age (<65 and ≥65 years old) at T<sub>0</sub>. Finally, and in order to ascertain the  
44 specificity of the findings, we examined the association between PPI exposure and the risk of a motor vehicle  
45 accident as a tracer outcome where a priori knowledge suggests an association is not likely to exist.  
46  
47  
48  
49  
50  
51  
52  
53  
54  
55  
56  
57  
58  
59  
60

**Patient involvement:**

No patients were involved in developing the hypothesis, the specific aims, or the research questions, nor were they involved in developing plans for design or implementation of the study. No patients were involved in the interpretation of study results, or write up of the manuscript. There are no plans to disseminate the results of the research to study participants or the relevant patient community.

**Results:**

The demographic and health characteristics of the overall primary cohort of new users of acid suppression therapy (n=349,312), by type of acid suppressant drug at time of cohort entry (H2 blockers n=73,335; PPI n=275,977), and those who were ever exposed to PPI (n=309,113) are provided in table 1. There were significant baseline differences in that cohort participants who were treated with PPI were older, and were more likely to have comorbid conditions including diabetes, hypertension, cardiovascular disease, and hyperlipidemia. Cohort participants treated with PPI were also more likely to have upper gastrointestinal tract bleeding, ulcer disease, H. Pylori infection, Barrett's esophagus, achalasia, stricture and esophageal adenocarcinoma (table 1). Survival curves for PPI and H2 blockers were presented in figure 1.

**Association between PPI use and risk of death:**

Among new users of acid suppression therapy (N=349,312), and over a median follow up of 5.71 years (IQR: 5.11 – 6.37), where exposure was treated as time-dependent covariate; PPI use was associated with increased risk of death compared to H2 blockers use (HR=1.25; CI=1.23-1.28) (table 2). Among new users of acid suppression therapy (N=349,312); in high-dimensional propensity score adjusted models, new PPI users had increased risk of death compared to new users of H2 blockers (HR=1.16; CI=1.13-1.18); based on two-stage residual inclusion estimation, risk of death was higher in new users PPI when compared to new users of H2 blockers (HR=1.21; CI=1.16-1.26). In a 1:1 time-dependent propensity score matched cohort of new users of PPI and H2 blockers (N=146,670), PPI users had significantly increased risk of death (HR=1.34; CI=1.29-1.39).



1 We examined the relationship of PPI and risk of death in secondary cohorts (as described in methods) where  
2 we considered risk associated with PPI use versus no known exposure to PPI (no PPI use +/- H2 blockers  
3 use) (N=3,288,092); the results suggest that PPI use was associated with increased risk of death (HR=1.15;  
4 CI=1.14-1.15) (table 2). Assessment of risk of death associated with PPI use versus no known exposure to any  
5 acid suppression therapy (no PPI use and no H2 blockers use) (N=2,887,070), suggests increased risk of  
6 death with PPI use (HR= 1.23; CI=1.22-1.24).  
7  
8  
9  
10  
11  
12  
13  
14  
15

### 16 **Association between PPI use and risk of death in those without gastrointestinal conditions:**

17 We then analyzed the association between PPI use and the risk of death in cohort where we excluded  
18 participants with documented medical conditions generally considered as indications for treatment with PPI  
19 including GERD, upper gastrointestinal tract bleeding, ulcer disease, H. Pylori infection, Barrett's esophagus,  
20 achalasia, stricture and esophageal adenocarcinoma. The intent of this analysis was to examine the putative  
21 association of PPI use and risk of death in a lower risk cohort. Examination of risk of death associated with use  
22 of acid suppression therapy (PPI vs. H2 blockers) suggests that risk of death was increased with PPI use  
23 (HR=1.24; CI=1.21-1.27) (table 2). Examination of the risk of death associated with PPI use versus no known  
24 exposure to PPI (no PPI use +/- H2 blockers use) suggests a higher risk of death associated with PPI use  
25 (HR=1.19; CI=1.18, 1.20). Results were consistent where we examined risk of death associated with PPI use  
26 versus no known exposure to any acid suppression therapy (no PPI use and no H2 blockers use) (HR=1.22;  
27 CI=1.21-1.23). Risk of death associated with PPI use in cohort participants without GI conditions but included  
28 participants with GERD yielded consistent results (PPI vs H2 blockers (HR=1.24; CI=1.21-1.27); PPI vs no PPI  
29 (HR=1.14; CI=1.13-1.14); PPI vs no PPI and no H2 blockers (HR=1.22; CI=1.21-1.22) (table 2).  
30  
31  
32  
33  
34  
35  
36  
37  
38  
39  
40  
41  
42  
43  
44  
45  
46  
47  
48

### 49 **Duration of exposure and excess risk of death:**

50 We examined the association between duration of PPI exposure and risk of death among new users of PPI  
51 (n=166,098). Compared to those exposed for ≤30 days, there was a graded association between duration of  
52 exposure and risk of death among those exposed for 31-90, 91-180, 181-360, and 361-720 days (table 3,  
53 figure 2).  
54  
55  
56  
57  
58  
59  
60

**Sensitivity analyses:**

1  
2 We tested the robustness of study results in sensitivity analyses where we built a less contemporary cohort as  
3 described in methods; demographic and health characteristics of this cohort are provided in supplemental table  
4  
5  
6  
7 1. Where exposure was treated as time-dependent, PPI use was associated with increased risk of death  
8 compared to H2 blockers use (HR=1.17; CI=1.15-1.19). In a 1:1 time-dependent propensity score matched  
9 cohort of PPI and H2 blockers, PPI users had significantly increased risk of death HR=1.21 (1.19-1.24).  
10  
11 Furthermore, we also observed a graded association between cumulative duration of exposure to PPI and risk  
12 of death (supplemental table 2, supplemental figure 3).  
13  
14  
15  
16  
17

18  
19 To examine the potential impact of residual confounding on study results, we used rule-out and external  
20 adjustment approaches as described by Schneeweiss(41). Using the rule-out approach, we characterized a set  
21 of parameters (OR for relationship of PPI and confounder), and (HR for relationship of confounder and death)  
22 with sufficient strength to fully explain the association observed in primary analyses (supplemental figure 4).  
23  
24 For example, if the confounder was twice as likely among PPI users (OR=2), and the HR of death associated  
25 with the uncontrolled confounder exceeded 4.0, then the uncontrolled confounder would fully explain the  
26 observed association between PPI and death (supplemental figure 4). Given that our analyses accounted for  
27 most known strong independent risk factors of death, and employed an active comparator group; to cancel the  
28 results, any uncontrolled confounder of the required prevalence (OR=2 or more in the example above), and  
29 strength (HR=4 or more in the example above) would also have to be independent of the confounders already  
30 adjusted for and is unlikely to exist; thus the results cannot be fully explained by this putative uncontrolled  
31 confounder.  
32  
33  
34  
35  
36  
37  
38  
39  
40  
41  
42  
43  
44

45  
46 External adjustment to estimate the impact of 3 unmeasured confounders including obesity, smoking, and use  
47 of therapeutics including anticoagulants, antiplatelet agents, and non-steroidal anti-inflammatory drugs shows  
48 a net confounding bias of 9.66% (supplemental figure 5). The total bias could move a null association between  
49 PPI and death from HR=1.00 to HR=1.10 (reflecting the net positive bias of 9.66% rounded up to 10.0%). The  
50 association we observed between PPI and death was 1.25>1.10, which cannot be fully due to bias of  
51 unmeasured confounding.  
52  
53  
54  
55  
56  
57  
58  
59  
60

1  
2  
3  
4 In analyses where time-dependent exposure was classified as current use (within 90 days), past use (use prior  
5 to 90 days), and never use of PPI; compared to use of H2 blockers and never use of PPI (the reference group),  
6  
7 current use of PPI and past use of PPI were associated with increased in risk of death (HR=1.23; CI=1.21-  
8  
9 1.26, and HR=1.53; CI=1.50, 1.57, respectively).

10  
11  
12  
13 The association between PPI and death remained significant after excluding cohort participants who died  
14 within 90 days after first PPI or H2 blockers prescription (HR=1.23; CI=1.20, 1.26), or additionally controlling for  
15 hemoglobin levels (HR=1.25; CI=1.23, 1.28). In models stratified for the presence of cardiovascular disease,  
16 history of pneumonia, chronic kidney disease, and age at T0; there was increased risk of death associated with  
17 PPI use in those with and without cardiovascular disease (HR=1.19; CI=1.15, 1.23, and HR=1.30; CI=1.27,  
18 1.34; respectively); with and without history of pneumonia (HR=1.39; CI=1.32, 1.45, and HR=1.21; CI=1.18,  
19 1.24; respectively); with and without chronic kidney disease (HR=1.18; CI=1.14, 1.22, and HR=1.29; CI=1.26,  
20 1.33; respectively); and above and below age 65 (HR=1.17; CI=1.13, 1.20, and HR=1.44; CI=1.39, 1.50;  
21 respectively). As a test of specificity, among users of acid suppression therapy, PPI use was not associated  
22 with increased risk of the tracer outcome of a motor vehicle accident (HR=0.99; CI= 0.89, 1.10).  
23  
24  
25  
26  
27  
28  
29  
30  
31  
32  
33  
34  
35  
36  
37

### 38 Discussion:

39  
40 This study provides insights into the excess risk of death associated with PPI use. In a large primary cohort of  
41 new users of acid suppression therapy followed for a median of 5.71 years, we show a significant association  
42 between PPI use and risk of all-cause mortality, risk was increased among those with no documented medical  
43 indications for PPI use, and with prolonged duration of use. The results were consistent in multiple analyses  
44 and robust to changes in epidemiologic design and statistical specifications, and were reproduced in an earlier  
45 and less contemporary cohort from an era where PPI use was far less frequent (45).  
46  
47  
48  
49  
50  
51  
52  
53  
54

55 PPI are widely used by millions of people for indications and durations that were never tested or approved;  
56 they are available over the counter (without prescription) in several countries, and generally perceived as safe  
57  
58  
59  
60

1 class of therapeutics; they are often overprescribed, rarely deprescribed, frequently started inappropriately  
2 during a hospital stay, and their use extended for long term duration without appropriate medical indication (46-  
3 50). Results of nationally representative data from the National Health and Nutrition Examination Survey,  
4 where analyses were weighted to represent the US adult population, showed that the use of prescription PPI  
5 increased from 3.9% to 7.8% from 1999-2000 to 2011-2012, representing a doubling of prevalence ratio(45).  
6 Studies estimate that between 53% and 69% of PPI prescriptions are for inappropriate indications(46, 51)  
7 where benefits of PPI use may not justify the risks for many users(51-53). The findings in our study highlight a  
8 potential excess risk of death among users of PPI, and in particular among cohort participants without GI  
9 comorbidities, and that risk is increased with prolonged duration of PPI exposure. While our results should not  
10 deter prescription and use of PPI where medically indicated, they may be used to encourage and promote  
11 pharmacovigilance and emphasize the need to exercise judicious use of PPI and limit use and duration of  
12 therapy to instances where there is a clear medical indication and where benefit outweighs potential risk(1).  
13 Standardized guidelines for initiating PPI prescription may lead to reduced overuse(54), regular review of  
14 prescription and over the counter medications, and deprescription where a medical indication for PPI treatment  
15 ceases to exist may be a meritorious approach(52).

16  
17  
18  
19  
20  
21  
22  
23  
24  
25  
26  
27  
28  
29  
30  
31  
32  
33  
34  
35 The biologic mechanism underpinning the association of PPI use and risk of death is not clear. Experimental  
36 evidence in rats suggests that PPI administration limits the regenerative capacity of livers following partial  
37 hepatectomy(55). Administration of PPI upregulates expression of mRNA, protein level, and results in  
38 increased activity of the heme oxygenase-1 enzyme in gastric and endothelial cells(56). Heme oxygenase-1 is  
39 generally seen as salutary, but its beneficial properties are vitiated at higher doses, and with sustained duration  
40 of expression(57). PPI treatment impairs lysosomal acidification and proteostasis and results in increased  
41 oxidative stress, dysfunction, telomere shortening and accelerated senescence of human endothelial cells(18,  
42 43 44 45 46 47 48 49 50 51 52 53 54 55 56 57 58 59 60  
58 59 60). Wu and collaborators undertook a systematic toxicity mechanism analysis using a high-throughput in-silico  
analysis of microarray data; they reported that PPI up-regulated genes in the cellular retinol metabolism  
pathway, and down-regulated genes in the complement and coagulation cascades pathway and that PPI may  
block pathways of antigen presentation, and abrogate the synthesis and secretion of cytokines and  
complement component proteins and coagulation factors(58, 59). How the changes in gene expression

1 contribute to excess risk of death is not yet entirely clear. The plausible clinical course leading to heightened  
2 risk of death is likely mediated by the occurrence of one or more of the adverse events associated with PPI use  
3 (kidney disease, dementia, hypomagnesemia, Clostridium difficile infection, osteoporotic fracture, etc...).  
4  
5 Further studies are needed to characterize the biologic mechanisms that might explain the epidemiologic  
6  
7 findings in this report.  
8  
9

10  
11 The constellation of findings in this report must be interpreted with the full cognizance of the observational  
12 study design where confounding by indication, and selection bias may represent limitations; we employed an  
13 analytic strategy to evaluate the risk of death among users of acid suppression therapy (PPI and H2 blockers);  
14 a class of therapeutics generally prescribed for similar indications, a strategy which may lessen but does not  
15 completely eliminate the possibility of confounding by indication bias. We additionally built time-dependent  
16 propensity score matched cohort, high dimensional propensity score adjusted models, and employed the use  
17 of instrumental variable to reduce potential confounding bias. Although we accounted for known covariates in  
18 our analyses, it is possible that there are residual confounders (either unmeasured, or unknown) that may still  
19 confound the association of PPI and risk of death. However, we evaluated the impact of residual confounding  
20 in quantitative bias analyses, and the results suggest that even with the application of unlikely (and  
21 exaggerated) set of assumptions, the risk cannot be fully explained by residual confounding. In our analyses,  
22 we defined drug exposure as having a prescription for it; since PPI (and H2 blockers) are available over the  
23 counter in the United States, it is possible that some patients in this cohort may have obtained and used PPI  
24 without prescription. However, owing to financial considerations, this is not highly likely, and if it occurred in  
25 some patients, it will have biased the results against the primary hypothesis and resulted in underestimation of  
26 risk. The cohort included mostly older white male US Veterans which may limit the generalizability of study  
27 results to a broader population. Our datasets did not include information on the cause of death. The study has  
28 a number of strengths including the use of national large scale data from a network of integrated health  
29 systems which was captured during routine medical care which minimizes selection bias. We employed a new  
30 user (incident user) approach, and evaluated the association between PPI use and risk of death using a  
31 number of analytical approaches where we consistently found a significant association between PPI use and  
32 increased risk of death. The consistency of study findings in our report, and the growing body of evidence in  
33  
34  
35  
36  
37  
38  
39  
40  
41  
42  
43  
44  
45  
46  
47  
48  
49  
50  
51  
52  
53  
54  
55  
56  
57  
58  
59  
60

1 the literature showing a host of adverse events associated with PPI use are compelling, and because of the  
2 high prevalence of PPI use, may have public health implications. Exercising pharmacovigilance and limiting  
3 PPI use to instances and durations to instances where it is medically indicated may be warranted.  
4  
5  
6  
7  
8  
9  
10  
11  
12  
13  
14  
15  
16  
17  
18  
19  
20  
21  
22  
23  
24  
25  
26  
27  
28  
29  
30  
31  
32  
33  
34  
35  
36  
37  
38  
39  
40  
41  
42  
43  
44  
45  
46  
47  
48  
49  
50  
51  
52  
53  
54  
55  
56  
57  
58  
59  
60

For peer review only

## Footnotes

**Contributors:** Research area and study design: YX, BB, TL, HX, YY, ZAA; data acquisition: YX, BB; data analysis and interpretation: YX, BB, TL, HX, YY, ZAA; statistical analysis: YX, BB; supervision and mentorship: ZAA. Each author contributed important intellectual content during manuscript drafting or revision and accepts accountability for the overall work by ensuring that questions pertaining to the accuracy or integrity of any portion of the work are appropriately investigated and resolved. ZAA takes responsibility that this study has been reported honestly, accurately, and transparently; that no important aspects of the study have been omitted, and that any discrepancies from the study as planned have been explained.

**Funding:** This research was funded by the United States Department of Veterans Affairs (for ZAA). The funders of this study had no role in study design; collection, analysis, and interpretation of data; writing the report; and the decision to submit the report for publication.

**Competing interests:** All authors have completed the ICMJE uniform disclosure form at [www.icmje.org/coi\\_disclosure.pdf](http://www.icmje.org/coi_disclosure.pdf) and declare: no support from any organisation for the submitted work; no financial relationships with any organisations that might have an interest in the submitted work in the previous three years; no other relationships or activities that could appear to have influenced the submitted work.

**Ethical approval:** This research project was reviewed and approved by the Institutional Review Board of the VA Saint Louis Health Care System.

**Data sharing:** Data is available through the United States Department of Veterans Affairs.

**Transparency:** The lead authors affirm that the manuscript is an honest, accurate, and transparent account of the study being reported; that no important aspects of the study have been omitted; and that any discrepancies from the study as planned have been explained.

**Disclaimer:** The contents do not represent the views of the U.S. Department of Veterans Affairs or the United States Government.

**Disclosures:** None.



## References:

1. Schoenfeld AJ, Grady D. Adverse Effects Associated With Proton Pump Inhibitors. *JAMA internal medicine*. 2016;176(2):172-4.
2. Xie Y, Bowe B, Li T, Xian H, Balasubramanian S, Al-Aly Z. Proton Pump Inhibitors and Risk of Incident CKD and Progression to ESRD. *Journal of the American Society of Nephrology : JASN*. 2016.
3. Antoniou T, Macdonald EM, Hollands S, Gomes T, Mamdani MM, Garg AX, et al. Proton pump inhibitors and the risk of acute kidney injury in older patients: a population-based cohort study. *CMAJ open*. 2015;3(2):E166-71.
4. Klepser DG, Collier DS, Cochran GL. Proton pump inhibitors and acute kidney injury: a nested case-control study. *BMC nephrology*. 2013;14:150.
5. Blank ML, Parkin L, Paul C, Herbison P. A nationwide nested case-control study indicates an increased risk of acute interstitial nephritis with proton pump inhibitor use. *Kidney international*. 2014;86(4):837-44.
6. Lazarus B, Chen Y, Wilson FP, Sang Y, Chang AR, Coresh J, et al. Proton Pump Inhibitor Use and the Risk of Chronic Kidney Disease. *JAMA internal medicine*. 2016;176(2):238-46.
7. Xie Y, Bowe B, Li T, Xian H, Yan Y, Al-Aly Z. Long Term Kidney Outcomes among Proton Pump Inhibitors Users without Intervening Acute Kidney Injury. *Kidney international*. 2016.
8. Gomm W, von Holt K, Thome F, Broich K, Maier W, Fink A, et al. Association of Proton Pump Inhibitors With Risk of Dementia: A Pharmacoepidemiological Claims Data Analysis. *JAMA neurology*. 2016;73(4):410-6.
9. Danziger J, William JH, Scott DJ, Lee J, Lehman LW, Mark RG, et al. Proton-pump inhibitor use is associated with low serum magnesium concentrations. *Kidney international*. 2013;83(4):692-9.
10. Kieboom BC, Kieffe-de Jong JC, Eijgelsheim M, Franco OH, Kuipers EJ, Hofman A, et al. Proton pump inhibitors and hypomagnesemia in the general population: a population-based cohort study. *American journal of kidney diseases : the official journal of the National Kidney Foundation*. 2015;66(5):775-82.
11. Broeren MA, Geerdink EA, Vader HL, van den Wall Bake AW. Hypomagnesemia induced by several proton-pump inhibitors. *Annals of internal medicine*. 2009;151(10):755-6.
12. Kwok CS, Arthur AK, Anibueze CI, Singh S, Cavallazzi R, Loke YK. Risk of Clostridium difficile infection with acid suppressing drugs and antibiotics: meta-analysis. *The American journal of gastroenterology*. 2012;107(7):1011-9.
13. Zhou B, Huang Y, Li H, Sun W, Liu J. Proton-pump inhibitors and risk of fractures: an update meta-analysis. *Osteoporosis international : a journal established as result of cooperation between the European Foundation for Osteoporosis and the National Osteoporosis Foundation of the USA*. 2015.
14. Yu EW, Bauer SR, Bain PA, Bauer DC. Proton pump inhibitors and risk of fractures: a meta-analysis of 11 international studies. *The American journal of medicine*. 2011;124(6):519-26.
15. Melloni C, Washam JB, Jones WS, Halim SA, Hasselblad V, Mayer SB, et al. Conflicting results between randomized trials and observational studies on the impact of proton pump inhibitors on cardiovascular events when coadministered with dual antiplatelet therapy: systematic review. *Circulation Cardiovascular quality and outcomes*. 2015;8(1):47-55.
16. Fillion KB, Chateau D, Targownik LE, Gershon A, Durand M, Tamim H, et al. Proton pump inhibitors and the risk of hospitalisation for community-acquired pneumonia: replicated cohort studies with meta-analysis. *Gut*. 2014;63(4):552-8.
17. Eom CS, Jeon CY, Lim JW, Cho EG, Park SM, Lee KS. Use of acid-suppressive drugs and risk of pneumonia: a systematic review and meta-analysis. *CMAJ : Canadian Medical Association journal = journal de l'Association medicale canadienne*. 2011;183(3):310-9.
18. Yepuri G, Sukhovshin R, Nazari-Shafti TZ, Petrascheck M, Ghebre YT, Cooke JP. Proton Pump Inhibitors Accelerate Endothelial Senescence. *Circulation research*. 2016.
19. Bell JS, Strandberg TE, Teramura-Gronblad M, Laurila JV, Tilvis RS, Pitkala KH. Use of proton pump inhibitors and mortality among institutionalized older people. *Archives of internal medicine*. 2010;170(17):1604-5.
20. Maggio M, Corsonello A, Ceda GP, Cattabiani C, Lauretani F, Butto V, et al. Proton pump inhibitors and risk of 1-year mortality and rehospitalization in older patients discharged from acute care hospitals. *JAMA internal medicine*. 2013;173(7):518-23.
21. Teramura-Gronblad M, Bell JS, Poysti MM, Strandberg TE, Laurila JV, Tilvis RS, et al. Risk of death associated with use of PPIs in three cohorts of institutionalized older people in Finland. *Journal of the American Medical Directors Association*. 2012;13(5):488 e9-13.



22. Wilson N, Gnjidic D, March L, Sambrook P, Hilmer SN. Use of PPIs are not associated with mortality in institutionalized older people. *Archives of internal medicine*. 2011;171(9):866; author reply -7.
23. Hu JCaM. Covariance Analysis of Heart Transplant Survival Data. *Journal of the American Statistical Association*. 1977;Vol. 72(No. 357 (Mar, 1977)):27-36
24. Li T, Xie Y, Bowe B, Xian H, Al-Aly Z. Serum phosphorus levels and risk of incident dementia. *PloS one*. 2017;12(2):e0171377.
25. Gawron AJ, Pandolfino JE, Miskevics S, Lavela SL. Proton pump inhibitor prescriptions and subsequent use in US veterans diagnosed with gastroesophageal reflux disease. *Journal of general internal medicine*. 2013;28(7):930-7.
26. Bowe B, Xie Y, Xian H, Balasubramanian S, Al-Aly Z. Low levels of high-density lipoprotein cholesterol increase the risk of incident kidney disease and its progression. *Kidney international*. 2016;89(4):886-96.
27. Bowe B, Xie Y, Xian H, Balasubramanian S, M AZ, Al-Aly Z. High Density Lipoprotein Cholesterol and the Risk of All-Cause Mortality among U.S. Veterans. *Clinical journal of the American Society of Nephrology : CJASN*. 2016.
28. Bowe B XY, Xian H, Lian M, Al-Aly Z. Geographic Variation and US County Characteristics Associated with Rapid Kidney Function Decline. *Kidney International Reports*. 2016.
29. Levey AS, Stevens LA, Schmid CH, Zhang YL, Castro AF, 3rd, Feldman HI, et al. A new equation to estimate glomerular filtration rate. *Annals of internal medicine*. 2009;150(9):604-12.
30. Xie Y, Bowe B, Xian H, Balasubramanian S, Al-Aly Z. Estimated GFR Trajectories of People Entering CKD Stage 4 and Subsequent Kidney Disease Outcomes and Mortality. *American journal of kidney diseases : the official journal of the National Kidney Foundation*. 2016.
31. Xie Y, Bowe B, Xian H, Balasubramanian S, Al-Aly Z. Rate of Kidney Function Decline and Risk of Hospitalizations in Stage 3A CKD. *Clinical journal of the American Society of Nephrology : CJASN*. 2015;10(11):1946-55.
32. Xie Y, Bowe B, Xian H, Balasubramanian S, Al-Aly Z. Estimated GFR Trajectories of People Entering CKD Stage 4 and Subsequent Kidney Disease Outcomes and Mortality. *American journal of kidney diseases : the official journal of the National Kidney Foundation*. 2016;68(2):219-28.
33. Xie Y, Bowe B, Xian H, Balasubramanian S, Al-Aly Z. Renal Function Trajectories in Patients with Prior Improved eGFR Slopes and Risk of Death. *PloS one*. 2016;11(2):e0149283.
34. Schultz LR, Peterson EL, Breslau N. Graphing survival curve estimates for time-dependent covariates. *Int J Methods Psychiatr Res*. 2002;11(2):68-74.
35. Lu B. Propensity score matching with time-dependent covariates. *Biometrics*. 2005;61(3):721-8.
36. Funk MJ, Westreich D, Wiesen C, Sturmer T, Brookhart MA, Davidian M. Doubly robust estimation of causal effects. *American journal of epidemiology*. 2011;173(7):761-7.
37. Schneeweiss S, Rassen JA, Glynn RJ, Avorn J, Mogun H, Brookhart MA. High-dimensional propensity score adjustment in studies of treatment effects using health care claims data. *Epidemiology*. 2009;20(4):512-22.
38. Terza JV, Basu A, Rathouz PJ. Two-stage residual inclusion estimation: addressing endogeneity in health econometric modeling. *J Health Econ*. 2008;27(3):531-43.
39. I Adams AL, Black MH, Zhang JL, Shi JM, Jacobsen SJ. Proton-pump inhibitor use and hip fractures in men: a population-based case-control study. *Annals of epidemiology*. 2014;24(4):286-90.
40. Suissa S. Immortal time bias in observational studies of drug effects. *Pharmacoepidemiology and drug safety*. 2007;16(3):241-9.
41. Schneeweiss S. Sensitivity analysis and external adjustment for unmeasured confounders in epidemiologic database studies of therapeutics. *Pharmacoepidemiology and drug safety*. 2006;15(5):291-303.
42. Collaborators GBDRF. Global, regional, and national comparative risk assessment of 79 behavioural, environmental and occupational, and metabolic risks or clusters of risks, 1990-2015: a systematic analysis for the Global Burden of Disease Study 2015. *Lancet*. 2016;388(10053):1659-724.
43. Mortality GBD, Causes of Death C. Global, regional, and national life expectancy, all-cause mortality, and cause-specific mortality for 249 causes of death, 1980-2015: a systematic analysis for the Global Burden of Disease Study 2015. *Lancet*. 2016;388(10053):1459-544.
44. Hvid-Jensen F NR, Pedersen L, Funch-Jensen P, Drewes AM, Larsen FB, Thomsen RW Lifestyle factors among proton pump inhibitor users and nonusers: a cross-sectional study in a population-based setting. *Dovepress*. 4 December 2013 Volume 2013:5(1) Pages 493—499.

- 1 45. Kantor ED, Rehm CD, Haas JS, Chan AT, Giovannucci EL. Trends in Prescription Drug Use Among  
2 Adults in the United States From 1999-2012. *Jama*. 2015;314(17):1818-31.
- 3 46. Forgacs I, Loganayagam A. Overprescribing proton pump inhibitors. *Bmj*. 2008;336(7634):2-3.
- 4 47. Choudhry MN, Soran H, Ziglam HM. Overuse and inappropriate prescribing of proton pump inhibitors in  
5 patients with *Clostridium difficile*-associated disease. *QJM : monthly journal of the Association of Physicians*.  
6 2008;101(6):445-8.
- 7 48. Zink DA, Pohlman M, Barnes M, Cannon ME. Long-term use of acid suppression started  
8 inappropriately during hospitalization. *Alimentary pharmacology & therapeutics*. 2005;21(10):1203-9.
- 9 49. Strid H, Simren M, Bjornsson ES. Overuse of acid suppressant drugs in patients with chronic renal  
10 failure. *Nephrology, dialysis, transplantation : official publication of the European Dialysis and Transplant  
11 Association - European Renal Association*. 2003;18(3):570-5.
- 12 50. Qato DM, Alexander GC, Conti RM, Johnson M, Schumm P, Lindau ST. Use of prescription and over-  
13 the-counter medications and dietary supplements among older adults in the United States. *Jama*.  
14 2008;300(24):2867-78.
- 15 51. Katz MH. Failing the acid test: benefits of proton pump inhibitors may not justify the risks for many  
16 users. *Archives of internal medicine*. 2010;170(9):747-8.
- 17 52. Linsky A, Simon SR. Reversing gears: discontinuing medication therapy to prevent adverse events.  
18 *JAMA internal medicine*. 2013;173(7):524-5.
- 19 53. Grady D, Redberg RF. Less is more: how less health care can result in better health. *Archives of  
20 internal medicine*. 2010;170(9):749-50.
- 21 54. Yachinski PS, Farrell EA, Hunt DP, Reid AE. Proton pump inhibitors for prophylaxis of nosocomial  
22 upper gastrointestinal tract bleeding: effect of standardized guidelines on prescribing practice. *Archives of  
23 internal medicine*. 2010;170(9):779-83.
- 24 55. Kucuk HF, Akyol H, Kaptanoglu L, Kurt N, Barisik NO, Bingul S, et al. Effect of proton pump inhibitors  
25 on hepatic regeneration. *Eur Surg Res*. 2006;38(3):322-8.
- 26 56. Becker JC, Grosser N, Waltke C, Schulz S, Erdmann K, Domschke W, et al. Beyond gastric acid  
27 reduction: proton pump inhibitors induce heme oxygenase-1 in gastric and endothelial cells. *Biochem Biophys  
28 Res Commun*. 2006;345(3):1014-21.
- 29 57. Nath KA. Heme oxygenase-1 and acute kidney injury. *Current opinion in nephrology and hypertension*.  
30 2014;23(1):17-24.
- 31 58. Wu D, Qiu T, Zhang Q, Kang H, Yuan S, Zhu L, et al. Systematic toxicity mechanism analysis of proton  
32 pump inhibitors: an in silico study. *Chem Res Toxicol*. 2015;28(3):419-30.
- 33 59. Liu W, Baker SS, Trinidad J, Burlingame AL, Baker RD, Forte JG, et al. Inhibition of lysosomal enzyme  
34 activities by proton pump inhibitors. *J Gastroenterol*. 2013;48(12):1343-52.
- 35  
36  
37  
38  
39  
40  
41  
42  
43  
44  
45  
46  
47  
48  
49  
50  
51  
52  
53  
54  
55  
56  
57  
58  
59  
60

**Table 1:** Baseline demographic and health characteristics of overall primary cohort of new users of acid suppression therapy, by type of acid suppressant at time of cohort entry, and those who were ever exposed to PPI.

|                                                         | Overall cohort | New users of H2 Blockers at time of cohort entry | New users of PPI at time of cohort entry | Ever exposed to PPI <sup>a</sup> | P Value <sup>b</sup> |        |
|---------------------------------------------------------|----------------|--------------------------------------------------|------------------------------------------|----------------------------------|----------------------|--------|
| N                                                       | 349312         | 73335                                            | 275977                                   | 309113                           |                      |        |
| Age (SD)                                                | 61.00 (14.92)  | 58.48 (15.13)                                    | 61.67 (14.79)                            | 61.37 (14.77)                    | <0.001               |        |
| eGFR in mL/min/1.73m <sup>2</sup> (SD)                  | 76.89 (22.66)  | 79.64 (21.96)                                    | 76.16 (22.79)                            | 76.60 (22.79)                    | <0.001               |        |
| Number of outpatient serum creatinine measurements (SD) | 6.85 (7.55)    | 6.67 (7.39)                                      | 6.89 (7.59)                              | 7.27 (8.00)                      | <0.001               |        |
| Number of hospitalizations (SD)                         | 0.51 (1.39)    | 0.52 (1.45)                                      | 0.51 (1.37)                              | 0.56 (1.49)                      | 0.014                |        |
| Race                                                    | White (%)      | 275473 (78.86)                                   | 56530 (77.08)                            | 218943 (79.33)                   | 244230 (79.01)       | <0.001 |
|                                                         | Black (%)      | 59243 (16.96)                                    | 13229 (18.04)                            | 46014 (16.67)                    | 52207 (16.89)        |        |
|                                                         | Other (%)      | 14596 (4.18)                                     | 3576 (4.88)                              | 11020 (3.99)                     | 12676 (4.10)         |        |
| Sex                                                     | Male (%)       | 326659 (93.51)                                   | 67748 (92.38)                            | 258911 (93.82)                   | 289233 (93.57)       | <0.001 |
|                                                         | Female (%)     | 22653 (6.49)                                     | 5587 (7.62)                              | 17066 (6.18)                     | 19880 (6.43)         |        |
| Diabetes mellitus (%)                                   | 90273 (25.84)  | 16758 (22.85)                                    | 73515 (26.64)                            | 82168 (26.58)                    | <0.001               |        |
| Hypertension (%)                                        | 225899 (64.67) | 44502 (60.68)                                    | 181397 (65.73)                           | 203700 (65.90)                   | <0.001               |        |
| Chronic lung disease (%)                                | 70281 (20.12)  | 13849 (18.88)                                    | 56432 (20.45)                            | 64777 (20.96)                    | <0.001               |        |
| Peripheral artery disease (%)                           | 11439 (3.27)   | 2225 (3.03)                                      | 9214 (3.34)                              | 10680 (3.46)                     | <0.001               |        |
| Cardiovascular disease (%)                              | 98137 (28.09)  | 17436 (23.78)                                    | 80701 (29.24)                            | 89878 (29.08)                    | <0.001               |        |
| Cerebrovascular disease (%)                             | 1858 (0.53)    | 372 (0.51)                                       | 1486 (0.54)                              | 1719 (0.56)                      | 0.30                 |        |
| Dementia (%)                                            | 16421(4.70)    | 3115 (4.25)                                      | 13306 (4.82)                             | 15384 (4.98)                     | <0.001               |        |
| Hyperlipidemia (%)                                      | 200397 (57.37) | 39818 (54.30)                                    | 160579 (58.19)                           | 181524 (58.72)                   | <0.001               |        |
| Hepatitis C (%)                                         | 5034 (1.44)    | 1184 (1.61)                                      | 3850 (1.40)                              | 4444 (1.44)                      | <0.001               |        |
| HIV (%)                                                 | 114 (0.03)     | 38 (0.05)                                        | 76 (0.03)                                | 113 (0.04)                       | 0.001                |        |
| Cancer (%)                                              | 49666 (14.22)  | 9123 (12.44)                                     | 40543 (14.69)                            | 45633 (14.76)                    | <0.001               |        |
| GERD (%)                                                | 100980 (28.91) | 20562 (28.04)                                    | 80418 (29.14)                            | 94517 (30.58)                    | <0.001               |        |
| Upper GI tract bleeding (%)                             | 9310 (2.67)    | 926 (1.26)                                       | 8384 (3.04)                              | 9098 (2.94)                      | <0.001               |        |
| Ulcer disease (%)                                       | 25626 (7.34)   | 3564 (4.86)                                      | 22062 (7.99)                             | 24864 (8.04)                     | <0.001               |        |
| H. Pylori infection (%)                                 | 3078 (0.88)    | 141 (0.19)                                       | 2937 (1.06)                              | 3239 (1.05)                      | <0.001               |        |
| Barrett's esophagus (%)                                 | 2324 (0.67)    | 89 (0.12)                                        | 2235 (0.81)                              | 2382 (0.77)                      | <0.001               |        |
| Achalasia (%)                                           | 151 (0.04)     | 10 (0.01)                                        | 141 (0.05)                               | 154 (0.05)                       | <0.001               |        |
| Stricture (%)                                           | 1992 (0.57)    | 132 (0.18)                                       | 1860 (0.67)                              | 2051 (0.66)                      | <0.001               |        |
| Esophageal                                              | 213 (0.06)     | 17 (0.02)                                        | 196 (0.07)                               | 213 (0.07)                       | <0.001               |        |

|   |                                                                                                                                                                                                                                                                                                                                                                                                                                                                                                                                                                                                                                                                               |                               |                                 |                    |                    |        |
|---|-------------------------------------------------------------------------------------------------------------------------------------------------------------------------------------------------------------------------------------------------------------------------------------------------------------------------------------------------------------------------------------------------------------------------------------------------------------------------------------------------------------------------------------------------------------------------------------------------------------------------------------------------------------------------------|-------------------------------|---------------------------------|--------------------|--------------------|--------|
| 1 | adenocarcinoma (%)                                                                                                                                                                                                                                                                                                                                                                                                                                                                                                                                                                                                                                                            |                               |                                 |                    |                    |        |
| 2 | Years of follow up (IQR) <sup>c</sup>                                                                                                                                                                                                                                                                                                                                                                                                                                                                                                                                                                                                                                         | 5.71 (5.11 – 6.37)            | 4.38 (1.16 – 5.92) <sup>d</sup> | 5.67 (5.09 – 6.34) | 5.59 (4.82 – 6.28) | <0.001 |
| 3 | Days of having related prescription during follow-up (IQR)                                                                                                                                                                                                                                                                                                                                                                                                                                                                                                                                                                                                                    | 442 (199 – 1272) <sup>e</sup> | 120 (60 – 400) <sup>d</sup>     | 450 (120 – 1299)   | 450 (120 – 1266)   | <0.001 |
| 4 | Death (%)                                                                                                                                                                                                                                                                                                                                                                                                                                                                                                                                                                                                                                                                     | 81463 (23.32)                 | 9018 (12.30) <sup>d</sup>       | 67450 (24.44)      | 72445 (23.44)      | <0.001 |
| 5 | Incident death in 100 person years (95% CI)                                                                                                                                                                                                                                                                                                                                                                                                                                                                                                                                                                                                                                   | 4.47 (4.44 – 4.50)            | 3.32 (3.25 – 3.39) <sup>d</sup> | 4.74 (4.70 – 4.77) | 4.67 (4.64 – 4.71) | <0.001 |
| 6 | <p>a. Includes patients exposed to PPI at T0 (n=275977) and during follow-up (n=33136). Variables were measured at time of PPI exposure.</p> <p>b. P value for difference between exposed to H2 at T0 and exposed to PPI at T0</p> <p>c. From T0 to first occurrence of death or September 30, 2013</p> <p>d. Outcome measured from T0 to first occurrence of exposure PPI, death or September 30, 2007</p> <p>e. Days of having PPI or H2 blockers</p> <p>Abbreviations: CI, Confidence interval; eGFR, estimated Glomerular Filtration Rate; GERD, Gastroesophageal Reflux Disease; HIV, human immunodeficiency virus; IQR, interquartile range; SD, Standard deviation</p> |                               |                                 |                    |                    |        |

**Table 2:** Association between PPI use and risk of death:

| Association Between PPI and Death                                                               |                        | Reference             | PPI use               |
|-------------------------------------------------------------------------------------------------|------------------------|-----------------------|-----------------------|
| PPI use VS H2 blockers use (N=349,312)                                                          | Incident rate (95% CI) | 3.32<br>(3.25 – 3.39) | 4.67<br>(4.64 – 4.71) |
|                                                                                                 | Unadjusted HR (95% CI) | 1                     | 1.46<br>(1.43 – 1.49) |
|                                                                                                 | Adjusted HR (95% CI)   | 1                     | 1.25<br>(1.23 – 1.28) |
| High-dimensional propensity score adjusted model of new users of PPI VS H2 blockers (N=349,312) | Incident rate (95% CI) | 3.32<br>(3.25 – 3.39) | 4.74<br>(4.70, 4.77)  |
|                                                                                                 | HR (95% CI)            | 1                     | 1.16<br>(1.13 – 1.18) |
| Two-stage residual inclusion estimation model of new users of PPI VS H2 blockers (N=318,960)    | Incident rate (95% CI) | 3.32<br>(3.25 – 3.39) | 4.74<br>(4.70 – 4.77) |
|                                                                                                 | HR (95% CI)            | 1                     | 1.21<br>(1.16 – 1.26) |
| Time dependent propensity score matched PPI VS H2 blockers (N=146,670)                          | Incident rate (95% CI) | 3.32<br>(3.25 – 3.39) | 4.37<br>(4.30 – 4.44) |
|                                                                                                 | Unadjusted HR (95% CI) | 1                     | 1.38<br>(1.34 – 1.42) |
|                                                                                                 | Adjusted HR (95% CI)   | 1                     | 1.34<br>(1.29 – 1.39) |
| PPI use VS no PPI (N=3,288,092)                                                                 | Incident rate (95% CI) | 3.64<br>(3.63 – 3.65) | 5.50<br>(5.47 – 5.53) |
|                                                                                                 | Unadjusted HR (95% CI) | 1                     | 1.47<br>(1.46 – 1.48) |
|                                                                                                 | Adjusted HR (95% CI)   | 1                     | 1.15<br>(1.14 – 1.15) |
| PPI use VS no PPI or H2 blockers (N=2,886,879)                                                  | Incident rate (95% CI) | 3.47<br>(3.46 – 3.48) | 5.50<br>(5.47 – 5.53) |
|                                                                                                 | Unadjusted HR (95% CI) | 1                     | 1.53<br>(1.52 – 1.54) |
|                                                                                                 | Adjusted HR (95% CI)   | 1                     | 1.23<br>(1.22 – 1.24) |
| PPI VS H2 blockers in a cohort without GI conditions (N=214,521)                                | Incident rate (95% CI) | 3.80<br>(3.71 – 3.89) | 5.39<br>(5.34 – 5.44) |
|                                                                                                 | Unadjusted HR (95% CI) | 1                     | 1.47<br>(1.43 – 1.51) |
|                                                                                                 | Adjusted HR (95% CI)   | 1                     | 1.24<br>(1.21 – 1.27) |
| PPI VS no PPI in a cohort without GI conditions (N=2,790,697)                                   | Incident rate (95% CI) | 3.54<br>(3.53 – 3.55) | 5.89<br>(5.86 – 5.93) |
|                                                                                                 | Unadjusted HR (95% CI) | 1                     | 1.62<br>(1.61 – 1.63) |
|                                                                                                 | Adjusted HR (95% CI)   | 1                     | 1.19<br>(1.18 – 1.20) |



|                                                                                                                                                                                                                                                                                                                                                                                                                                                                                                                                                                                                                                                                                                                                                                                                                                                                                                                                                                                                                                                                                                                                                                                                                                           |                        |                       |                       |
|-------------------------------------------------------------------------------------------------------------------------------------------------------------------------------------------------------------------------------------------------------------------------------------------------------------------------------------------------------------------------------------------------------------------------------------------------------------------------------------------------------------------------------------------------------------------------------------------------------------------------------------------------------------------------------------------------------------------------------------------------------------------------------------------------------------------------------------------------------------------------------------------------------------------------------------------------------------------------------------------------------------------------------------------------------------------------------------------------------------------------------------------------------------------------------------------------------------------------------------------|------------------------|-----------------------|-----------------------|
| 1<br>2<br>3<br>4<br>5<br>6<br>PPI VS no PPI or H2 blockers in a cohort without GI conditions (N=2,543,480)                                                                                                                                                                                                                                                                                                                                                                                                                                                                                                                                                                                                                                                                                                                                                                                                                                                                                                                                                                                                                                                                                                                                | Incident rate (95% CI) | 3.45<br>(3.44 – 3.46) | 5.89<br>(5.86 – 5.93) |
|                                                                                                                                                                                                                                                                                                                                                                                                                                                                                                                                                                                                                                                                                                                                                                                                                                                                                                                                                                                                                                                                                                                                                                                                                                           | Unadjusted HR (95% CI) | 1                     | 1.65<br>(1.64 – 1.67) |
|                                                                                                                                                                                                                                                                                                                                                                                                                                                                                                                                                                                                                                                                                                                                                                                                                                                                                                                                                                                                                                                                                                                                                                                                                                           | Adjusted HR (95% CI)   | 1                     | 1.22<br>(1.21 – 1.23) |
| 7<br>8<br>9<br>10<br>11<br>12<br>13<br>PPI VS H2 blockers in a cohort without GI conditions except for GERD (N=311,115)                                                                                                                                                                                                                                                                                                                                                                                                                                                                                                                                                                                                                                                                                                                                                                                                                                                                                                                                                                                                                                                                                                                   | Incident rate (95% CI) | 3.30<br>(3.23 – 3.37) | 4.51<br>(4.47 – 4.54) |
|                                                                                                                                                                                                                                                                                                                                                                                                                                                                                                                                                                                                                                                                                                                                                                                                                                                                                                                                                                                                                                                                                                                                                                                                                                           | Unadjusted HR (95% CI) | 1                     | 1.42<br>(1.38 – 1.45) |
|                                                                                                                                                                                                                                                                                                                                                                                                                                                                                                                                                                                                                                                                                                                                                                                                                                                                                                                                                                                                                                                                                                                                                                                                                                           | Adjusted HR (95% CI)   | 1                     | 1.24<br>(1.21 – 1.27) |
| 14<br>15<br>16<br>17<br>18<br>19<br>20<br>PPI VS no PPI in a cohort without GI conditions except for GERD (N=3,132,126)                                                                                                                                                                                                                                                                                                                                                                                                                                                                                                                                                                                                                                                                                                                                                                                                                                                                                                                                                                                                                                                                                                                   | Incident rate (95% CI) | 3.59<br>(3.58 – 3.60) | 5.36<br>(5.34 – 5.39) |
|                                                                                                                                                                                                                                                                                                                                                                                                                                                                                                                                                                                                                                                                                                                                                                                                                                                                                                                                                                                                                                                                                                                                                                                                                                           | Unadjusted HR (95% CI) | 1                     | 1.45<br>(1.44 – 1.46) |
|                                                                                                                                                                                                                                                                                                                                                                                                                                                                                                                                                                                                                                                                                                                                                                                                                                                                                                                                                                                                                                                                                                                                                                                                                                           | Adjusted HR (95% CI)   | 1                     | 1.14<br>(1.13 – 1.14) |
| 21<br>22<br>23<br>24<br>25<br>26<br>27<br>PPI VS no PPI or H2 blockers in a cohort without GI conditions except for GERD (N=2,678,478)                                                                                                                                                                                                                                                                                                                                                                                                                                                                                                                                                                                                                                                                                                                                                                                                                                                                                                                                                                                                                                                                                                    | Incident rate (95% CI) | 3.44<br>(3.44 – 3.45) | 5.36<br>(5.34 – 5.39) |
|                                                                                                                                                                                                                                                                                                                                                                                                                                                                                                                                                                                                                                                                                                                                                                                                                                                                                                                                                                                                                                                                                                                                                                                                                                           | Unadjusted HR (95% CI) | 1                     | 1.50<br>(1.49 – 1.51) |
|                                                                                                                                                                                                                                                                                                                                                                                                                                                                                                                                                                                                                                                                                                                                                                                                                                                                                                                                                                                                                                                                                                                                                                                                                                           | Adjusted HR (95% CI)   | 1                     | 1.22<br>(1.21 – 1.22) |
| <p>28 a. Incident rate as incident death in 100 person years</p> <p>29 b. All models except time dependent propensity score matched and high-dimensional propensity score adjusted models were time dependent models. Effect of PPI was treated as time dependent and was defined as once patients used PPI, they were in PPI group during the remaining follow-up.</p> <p>30 c. Adjusted model controlling for eGFR, age, race, gender, number of serum creatinine measurements, number of hospitalizations, diabetes mellitus, hypertension, cardiovascular disease, peripheral artery disease, cerebrovascular disease, chronic lung disease, hepatitis C, HIV, dementia, cancer, GERD, upper GI tract bleeding, ulcer disease, H. Pylori infection, Barrett's esophagus, achalasia, stricture and esophageal adenocarcinoma, unless used in analysis inclusion criteria.</p> <p>31 d. GI conditions include upper GI tract bleeding, ulcer disease, H. Pylori infection, Barrett's esophagus, achalasia, stricture and esophageal adenocarcinoma</p> <p>32</p> <p>33</p> <p>34</p> <p>35</p> <p>36</p> <p>37</p> <p>38</p> <p>39</p> <p>40</p> <p>41</p> <p>42</p> <p>43 Abbreviations: CI, Confidence interval; HR, Hazard Ratio</p> |                        |                       |                       |

**Table 3:** Duration of exposure to PPI and risk of death among new users of PPI (n=166,098)

| Duration (Days)                                                                                                                                                                                                                                                                                                                                                                                                                                                                                                                                                              | ≤ 30             | 31 - 90             | 91 - 180            | 181 - 360           | 361 - 720           |
|------------------------------------------------------------------------------------------------------------------------------------------------------------------------------------------------------------------------------------------------------------------------------------------------------------------------------------------------------------------------------------------------------------------------------------------------------------------------------------------------------------------------------------------------------------------------------|------------------|---------------------|---------------------|---------------------|---------------------|
| N (%)                                                                                                                                                                                                                                                                                                                                                                                                                                                                                                                                                                        | 24748<br>(14.90) | 39345<br>(23.69)    | 29334<br>(17.66)    | 33907<br>(20.41)    | 38764<br>(23.34)    |
| Hazard Ratio (95%CI)                                                                                                                                                                                                                                                                                                                                                                                                                                                                                                                                                         | 1                | 1.05<br>(1.02-1.08) | 1.17<br>(1.13-1.20) | 1.31<br>(1.27-1.34) | 1.51<br>(1.47-1.56) |
| a. Within people exposure to PPI between 1 to 720 days<br>b. Model controls for eGFR, age, race, gender, number of serum creatinine measurements, number of hospitalizations, diabetes mellitus, hypertension, cardiovascular disease, peripheral artery disease, cerebrovascular disease, chronic lung disease, hepatitis C, HIV, dementia, cancer, GERD, upper GI tract bleeding, ulcer disease, H. Pylori infection, Barrett's esophagus, achalasia, stricture and esophageal adenocarcinoma<br>c. Time zero defined as date when the patients last PPI prescription ends |                  |                     |                     |                     |                     |

**Figure legends:**

**Figure 1:** Survival curves for PPI and H2 blockers

**Figure 2:** Duration of PPI exposure and risk of death among new PPI users (n=166,098)

**Supplemental Figures:**

**Supplemental Figure 1:** Flowchart of primary cohort

**Supplemental Figure 2a:** Flowchart of secondary cohort PPI vs no PPI

**Supplemental Figure 2b:** Flowchart of secondary cohort PPI vs no PPI no H2 blockers

**Supplemental figure 3:** Duration of PPI exposure and risk of death among new PPI users in an older (less contemporary) sensitivity cohort (n=101,109)

**Supplemental figure 4: Estimation of the impact of uncontrolled confounder using the rule-out**

**approach:** To investigate the impact of potential residual confounding; rule-out approach was used, where prevalence of potential confounder was set at 30% and prevalence of exposure (PPI use) was set at 88.5% (the latter is derived from our data). The X axis describes the Odds Ratio (OR) of the association between the confounder and PPI users. The Y axis describes the Hazard Ratio (HR) of the association between the confounder and risk of death. The blue line splits the area into two: the upper right area represents all parameter combinations of OR (between PPI use and confounder) and HR (between confounder and death) that are strong enough to move the apparent HR (AHR) from 1.25 (the HR observed in our primary analysis) to 1 or lower, rejecting the hypothesis of an association between PPI use and risk of death. The corollary observation is that the area to the lower left represents all parameter combinations that would result in acceptance of the primary hypothesis. For example, the results show that for uncontrolled confounder that is twice as likely among PPI users (OR=2), the strength of the association between the uncontrolled confounder and risk of death would have to exceed 4 (HR>4) for the uncontrolled confounder to fully explain the observed association between PPI and death (where the combination of OR=2, HR>4 is in the area above the blue line).



1  
2  
3  
4 **Supplemental figure 5: External adjustment to estimate the impact of 3 unmeasured confounders:** To  
5 investigate the impact of potential residual confounding, we applied external adjustment to estimate the impact  
6 of 3 unmeasured confounders including obesity, smoking, and use of therapeutics including anticoagulants,  
7 antiplatelet agents, and non-steroidal anti-inflammatory drugs. In order to generate extreme bias estimates  
8 (against the hypothesis) we assumed that users of H2 Blockers are generally healthy and have similar health  
9 characteristics as the general population. We used published estimates from external data sources as follows  
10 (2, 41-44): Prevalence of obesity 30.00%, OR for PPI and obesity=1.30, and HR for obesity and death =1.30;  
11 prevalence of smoking=24.79%, OR for PPI and smoking =1.20, and HR for smoking and death =2.80;  
12 prevalence of anticoagulants, antiplatelet, and NSAIDs use=28.85%, OR for PPI and drug =2.20, and HR for  
13 drug and death =1.30. Given the HR between each confounder and risk of death, and assuming there is no  
14 overlap in risk among confounders (which is an unlikely assumption, but one which would generate the  
15 greatest amount of bias against our hypothesis), we found a total positive bias (or net confounding bias) of  
16 9.66% (1.47%+4.23%+3.96%). The total bias could move a null association between PPI to death from  
17 HR=1.00 to HR=1.10 (reflecting the net positive bias of 9.66% rounded up to 10.0%). The association we  
18 observed between PPI and death is 1.25 (higher than 1.10), suggesting that it cannot be fully due to bias of  
19 unmeasured confounding. (Using the curves in the figures; for obesity, when the HR=1.30, the corresponding  
20 bias=1.47%; for smoking, when the HR=2.80, the corresponding bias=4.23%; for anticoagulants, antiplatelet,  
21 and NSAIDs, when the HR=1.30, the corresponding bias=3.96%).  
22  
23  
24  
25  
26  
27  
28  
29  
30  
31  
32  
33  
34  
35  
36  
37  
38  
39  
40  
41  
42  
43  
44  
45  
46  
47  
48  
49  
50  
51  
52  
53  
54  
55  
56  
57  
58  
59  
60

1  
2  
3  
4  
5  
6  
7  
8  
9  
10  
11  
12  
13  
14  
15  
16  
17  
18  
19  
20  
21  
22  
23  
24  
25  
26  
27  
28  
29  
30  
31  
32  
33  
34  
35  
36  
37  
38  
39  
40  
41  
42  
43  
44  
45  
46  
47  
48  
49  
50  
51  
52  
53  
54  
55  
56  
57  
58  
59  
60

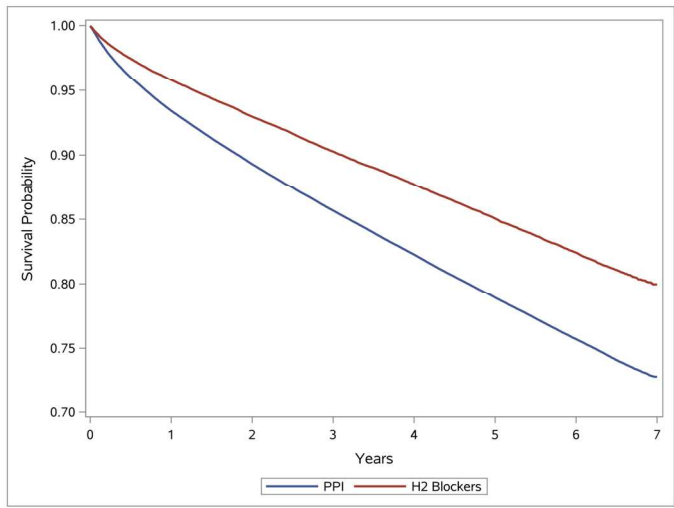

Figure 1: Survival curves for PPI and H2 blockers  
Figure 1  
190x142mm (300 x 300 DPI)

ew only

1  
2  
3  
4  
5  
6  
7  
8  
9  
10  
11  
12  
13  
14  
15  
16  
17  
18  
19  
20  
21  
22  
23  
24  
25  
26  
27  
28  
29  
30  
31  
32  
33  
34  
35  
36  
37  
38  
39  
40  
41  
42  
43  
44  
45  
46  
47  
48  
49  
50  
51  
52  
53  
54  
55  
56  
57  
58  
59  
60

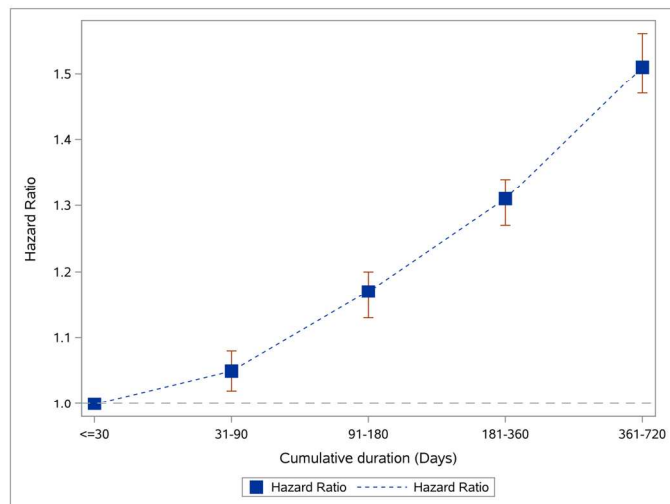

Figure 2: Duration of PPI exposure and risk of death among new PPI users (n=166,098)

Figure 2

190x142mm (300 x 300 DPI)

ew only

# BMJ Open Supplemental Figure 1

1  
2  
3  
4  
5  
6  
7  
8  
9  
10  
11  
12  
13  
14  
15  
16  
17  
18  
19  
20  
21  
22  
23  
24  
25  
26  
27  
28  
29  
30  
31  
32  
33  
34  
35  
36  
37  
38  
39  
40  
41  
42  
43

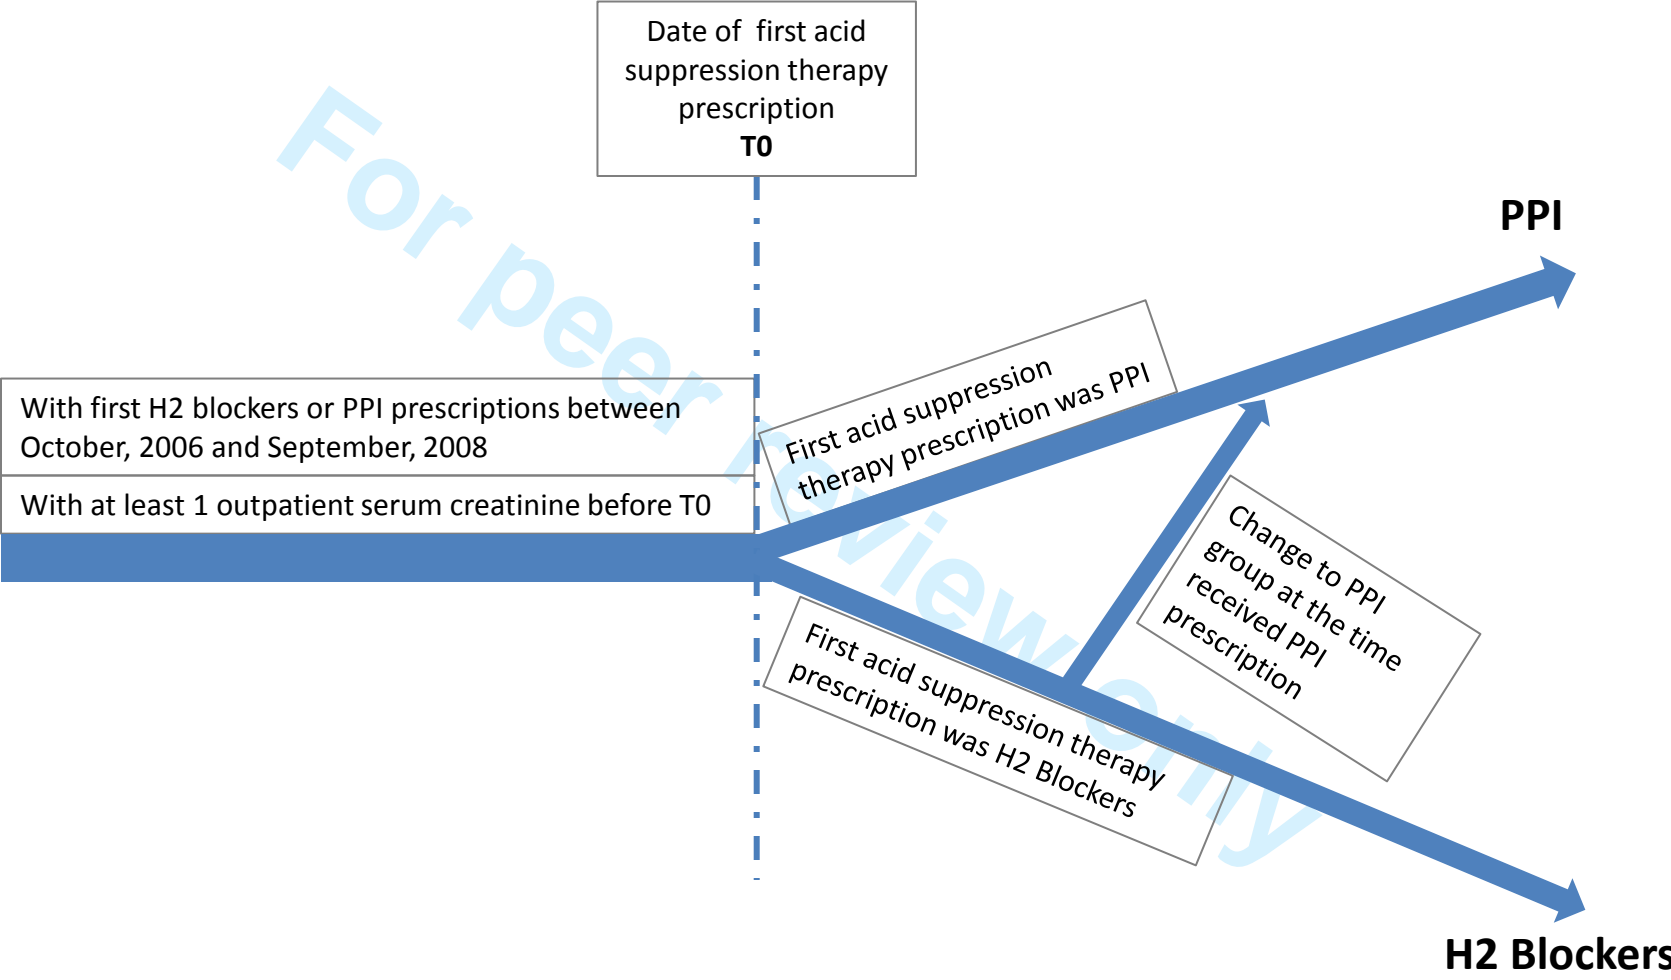

# Supplemental Figure 2a

1  
2  
3  
4  
5  
6  
7  
8  
9  
10  
11  
12  
13  
14  
15  
16  
17  
18  
19  
20  
21  
22  
23  
24  
25  
26  
27  
28  
29  
30  
31  
32  
33  
34  
35  
36  
37  
38  
39  
40  
41  
42  
43

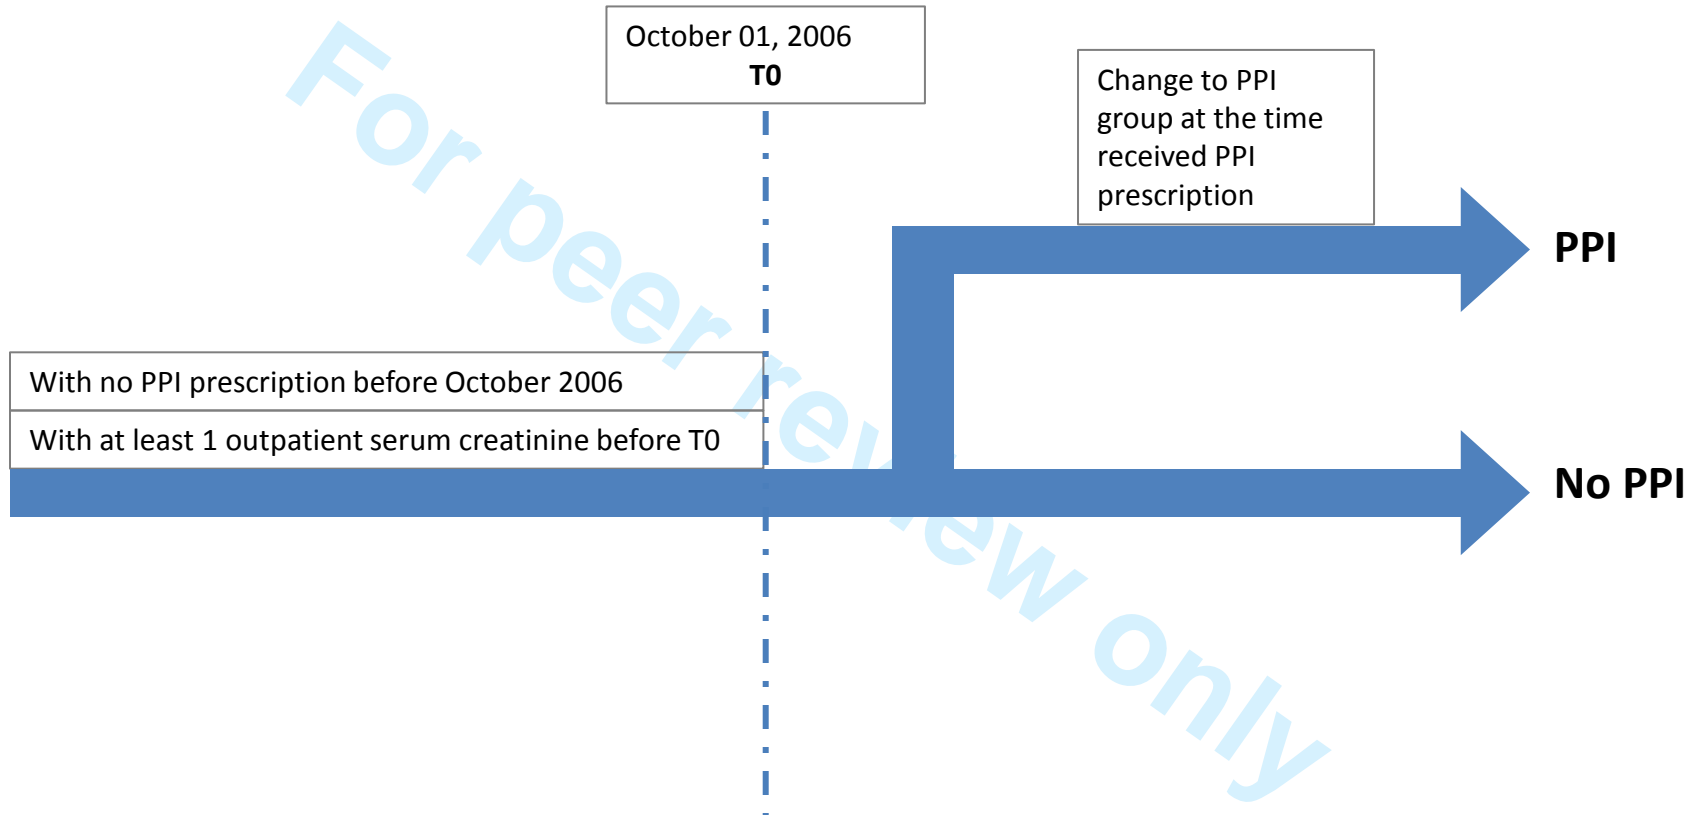

BMJ Open  
Supplemental Figure 2b

1  
2  
3  
4  
5  
6  
7  
8  
9  
10  
11  
12  
13  
14  
15  
16  
17  
18  
19  
20  
21  
22  
23  
24  
25  
26  
27  
28  
29  
30  
31  
32  
33  
34  
35  
36  
37  
38  
39  
40  
41  
42  
43

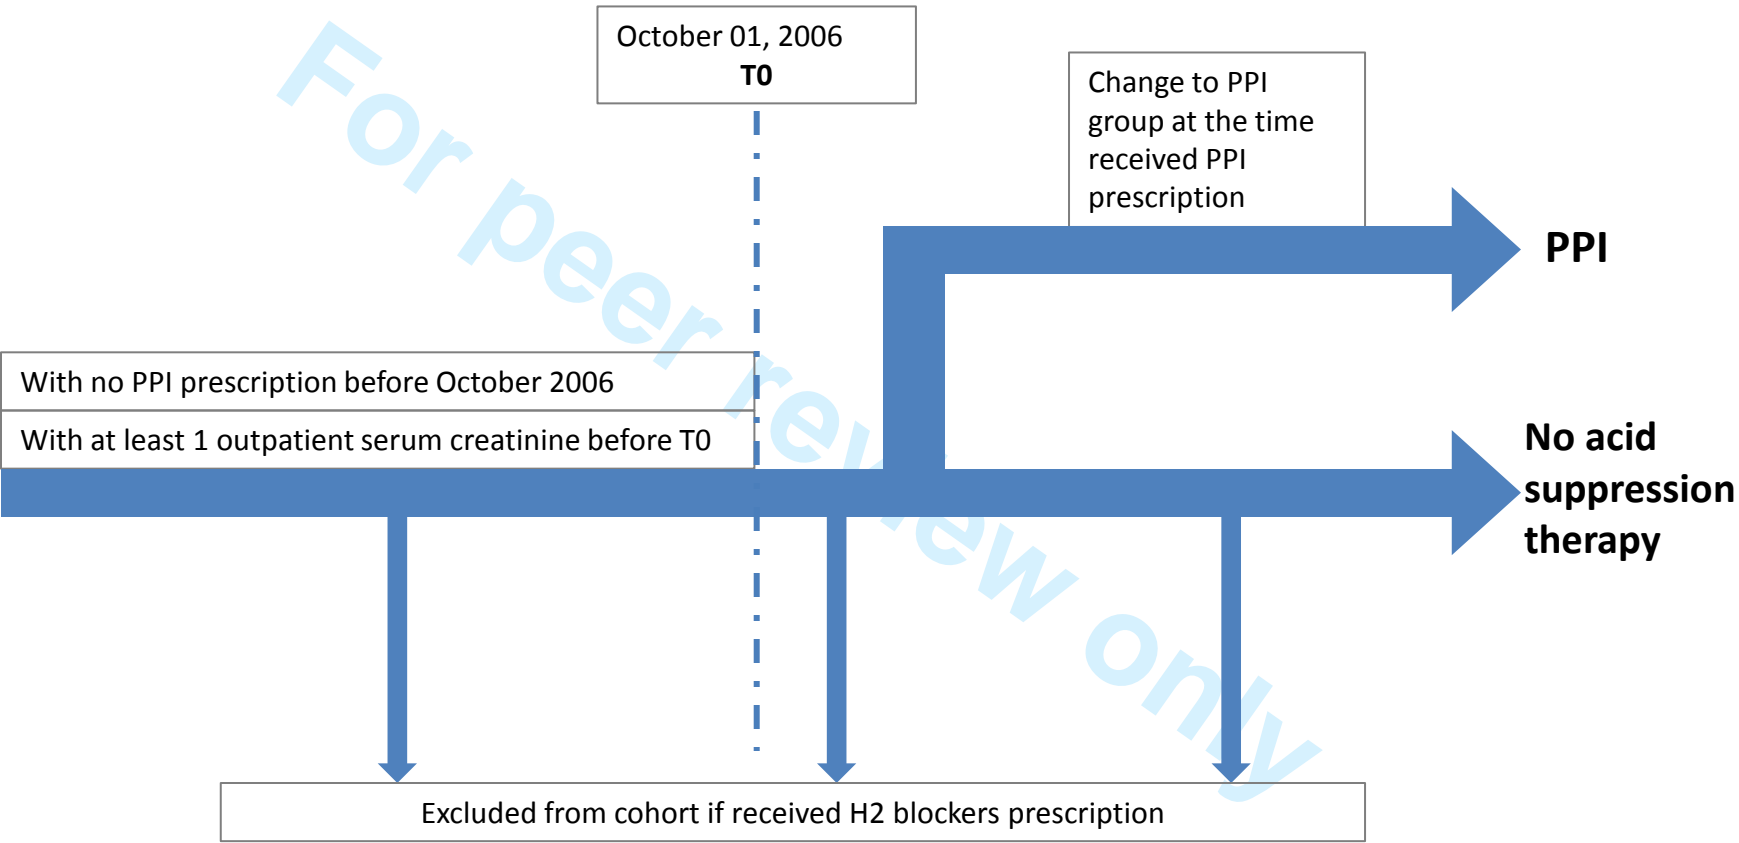

## Supplemental Figure 3

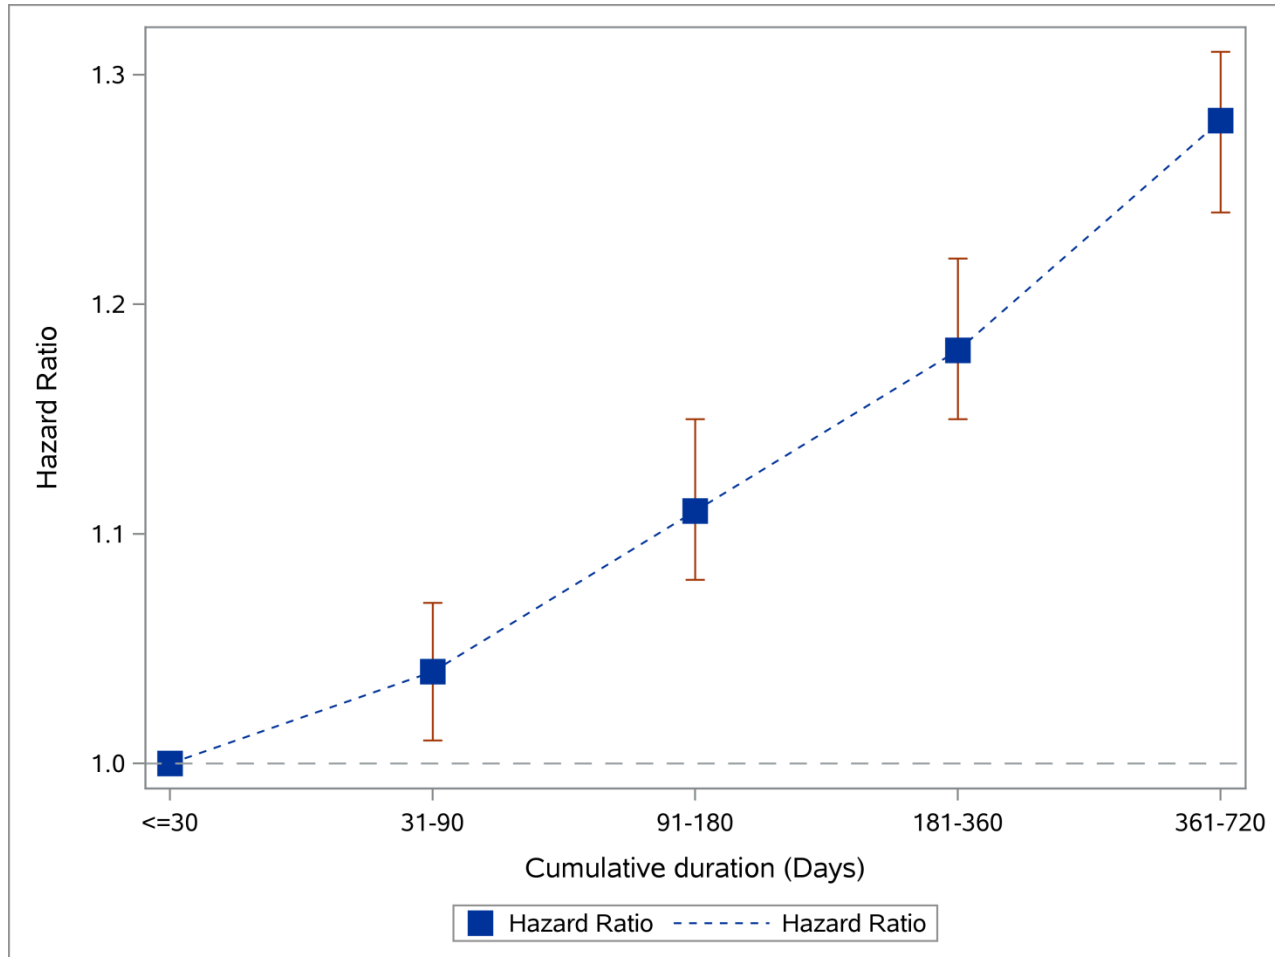

### Supplemental Figure 4

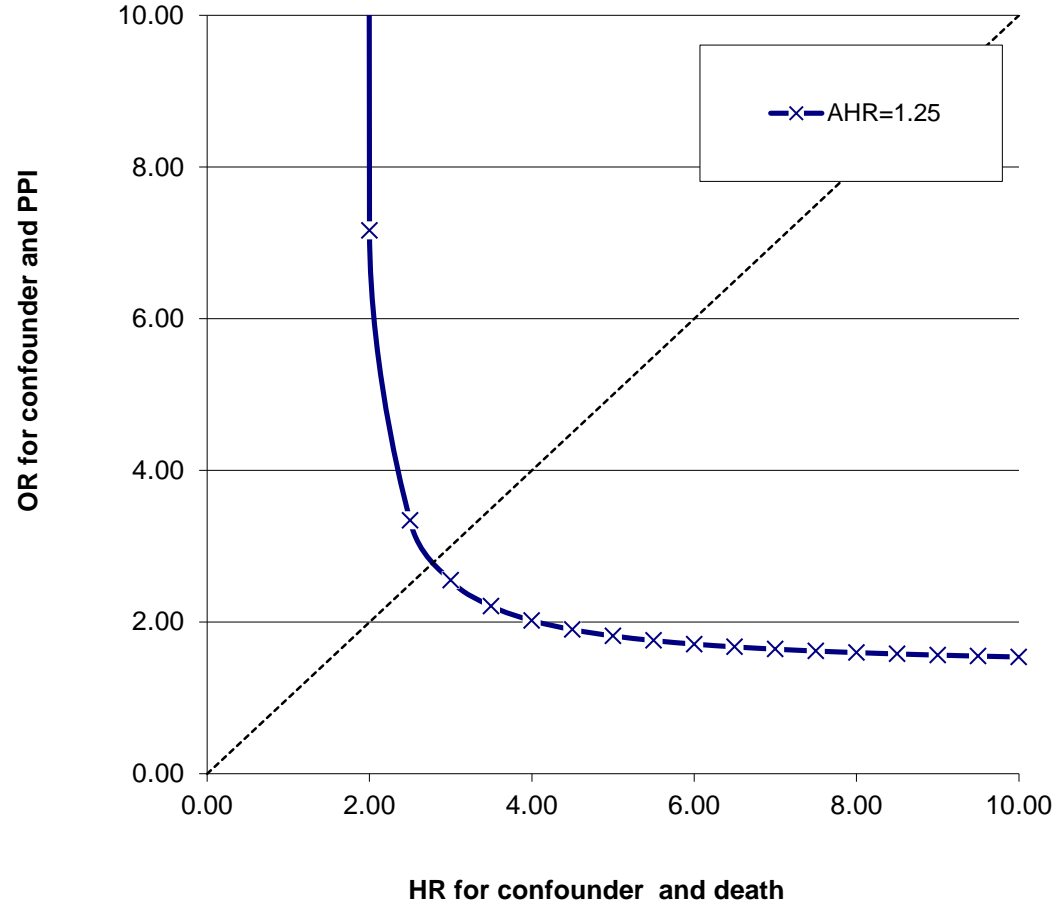



# Supplemental Figure 5

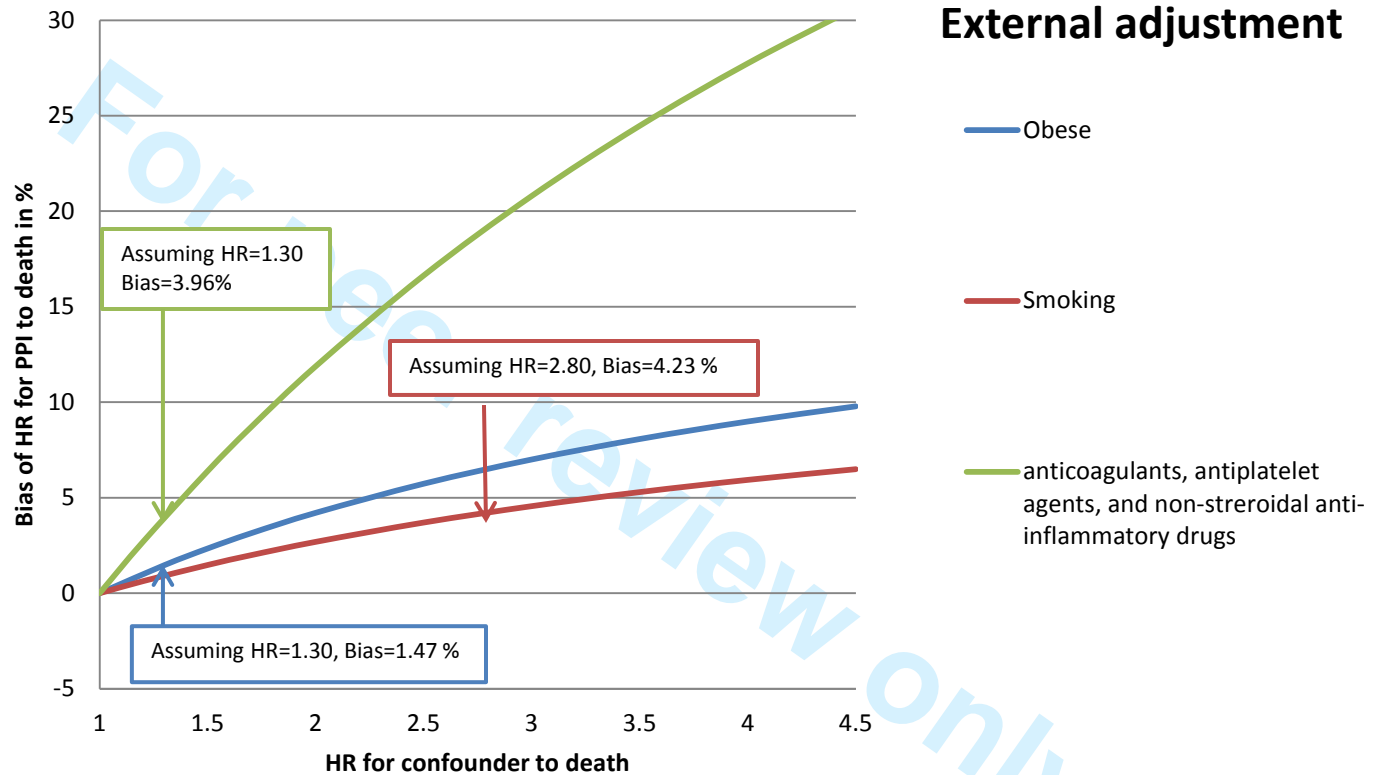

1  
2  
3  
4  
5  
6  
7  
8  
9  
10  
11  
12  
13  
14  
15  
16  
17  
18  
19  
20  
21  
22  
23  
24  
25  
26  
27  
28  
29  
30  
31  
32  
33  
34  
35  
36  
37  
38  
39  
40  
41  
42  
43

**Supplemental table 1:** Baseline demographic and health characteristics of the overall 2001 cohort of new users of acid suppression therapy, by type of acid suppressant at time of cohort entry, and those who were ever exposed to PPI.

|                                                         |            | Overall cohort | New users of H2 Blockers at time of cohort entry | New users of PPI at time of cohort entry | Ever exposed to PPI <sup>a</sup> | P Value <sup>b</sup> |
|---------------------------------------------------------|------------|----------------|--------------------------------------------------|------------------------------------------|----------------------------------|----------------------|
| N                                                       |            | 396884         | 208492                                           | 188392                                   | 293265                           |                      |
| Age (SD)                                                |            | 62.98 (13.05)  | 61.93 (13.24)                                    | 64.14 (12.74)                            | 63.78 (12.81)                    | <0.001               |
| eGFR in mL/min/1.73m <sup>2</sup> (SD)                  |            | 74.74 (22.43)  | 76.24 (22.04)                                    | 73.09 (22.73)                            | 73.38 (22.61)                    | <0.001               |
| Number of outpatient serum creatinine measurements (SD) |            | 3.01 (3.40)    | 2.95 (3.23)                                      | 3.06 (3.58)                              | 4.52 (5.51)                      | <0.001               |
| Number of hospitalizations (SD)                         |            | 0.37 (0.96)    | 0.36 (0.95)                                      | 0.38 (0.97)                              | 0.51 (1.30)                      | <0.001               |
| Race                                                    | White (%)  | 318534 (80.26) | 164295 (78.80)                                   | 154239 (81.87)                           | 236930 (80.79)                   | <0.001               |
|                                                         | Black (%)  | 58355 (14.70)  | 32053 (15.37)                                    | 26302 (13.96)                            | 42498 (14.49)                    |                      |
|                                                         | Other (%)  | 19995 (5.04)   | 12144 (5.82)                                     | 7851 (4.17)                              | 13837 (4.72)                     |                      |
| Sex                                                     | Male (%)   | 377769 (95.18) | 197685 (94.82)                                   | 180084 (95.59)                           | 279023 (95.14)                   | <0.001               |
|                                                         | Female (%) | 19115 (4.82)   | 10807 (5.18)                                     | 8308 (4.41)                              | 14242 (4.86)                     |                      |
| Diabetes mellitus (%)                                   |            | 92555 (23.32)  | 46562 (22.33)                                    | 45993 (24.41)                            | 74344 (25.35)                    | <0.001               |
| Hypertension (%)                                        |            | 231296 (58.28) | 119554 (57.34)                                   | 111742 (59.31)                           | 184529 (62.92)                   | <0.001               |
| Chronic lung disease (%)                                |            | 75810 (19.10)  | 39270 (18.84)                                    | 36540 (19.40)                            | 64254 (21.91)                    | <0.001               |
| Peripheral artery disease (%)                           |            | 9141 (2.30)    | 4646 (2.23)                                      | 4495 (2.39)                              | 8751 (2.98)                      | 0.001                |
| Cardiovascular disease (%)                              |            | 122301 (30.82) | 59814 (28.69)                                    | 62487 (33.17)                            | 101220 (34.51)                   | <0.001               |
| Cerebrovascular disease (%)                             |            | 1529 (0.39)    | 776 (0.37)                                       | 753 (0.40)                               | 1419 (0.48)                      | 0.16                 |
| Dementia (%)                                            |            | 12031 (3.03)   | 6094 (2.92)                                      | 5937 (3.15)                              | 10615 (3.62)                     | <0.001               |
| Hyperlipidemia (%)                                      |            | 152040 (38.31) | 78546 (37.67)                                    | 73494 (39.01)                            | 130557 (44.52)                   | <0.001               |
| Hepatitis C (%)                                         |            | 9332 (2.35)    | 4832 (2.32)                                      | 4500 (2.39)                              | 8456 (2.88)                      | 0.14                 |
| HIV (%)                                                 |            | 209 (0.05)     | 105 (0.05)                                       | 104 (0.06)                               | 183 (0.06)                       | 0.51                 |
| Cancer (%)                                              |            | 46451 (11.70)  | 23312 (11.18)                                    | 23139 (12.28)                            | 39473 (13.46)                    | <0.001               |
| GERD (%)                                                |            | 110217 (27.77) | 52586 (25.22)                                    | 57631 (30.59)                            | 114132 (38.92)                   | <0.001               |

|                                                            |                                  |                                    |                       |                       |        |
|------------------------------------------------------------|----------------------------------|------------------------------------|-----------------------|-----------------------|--------|
| Upper GI tract bleeding (%)                                | 11282 (2.84)                     | 3352 (1.61)                        | 7930 (4.21)           | 12458 (4.25)          | <0.001 |
| Ulcer disease (%)                                          | 35189 (8.87)                     | 14152 (6.79)                       | 21037 (11.17)         | 37472 (12.78)         | <0.001 |
| H. Pylori infection (%)                                    | 2599 (0.65)                      | 477 (0.23)                         | 2122 (1.13)           | 3795 (1.29)           | <0.001 |
| Barrett's esophagus (%)                                    | 0 (0.00)                         | 0 (0.00)                           | 0 (0.00)              | 245 (0.08)            | NA     |
| Achalasia (%)                                              | 188 (0.05)                       | 41 (0.02)                          | 147 (0.08)            | 245 (0.08)            | <0.001 |
| Stricture (%)                                              | 2218 (0.56)                      | 415 (0.20)                         | 1803 (0.96)           | 2953 (1.01)           | <0.001 |
| Esophageal adenocarcinoma (%)                              | 223 (0.06)                       | 79 (0.04)                          | 147 (0.08)            | 262 (0.09)            | <0.001 |
| Years of follow up (IQR) <sup>c</sup>                      | 5.65<br>(5.05 – 6.28)            | 3.35<br>(1.01 – 5.71) <sup>d</sup> | 5.51<br>(5.01 – 6.08) | 5.23<br>(3.22 – 5.90) | <0.001 |
| Days of having related prescription during follow-up (IQR) | 587<br>(168 – 1423) <sup>e</sup> | 188<br>(90 – 561) <sup>d</sup>     | 621<br>(171 – 1496)   | 579<br>(172 – 1350)   | <0.001 |
| Death (%)                                                  | 102802 (25.90)                   | 31260 (14.99) <sup>d</sup>         | 51785 (27.49)         | 71565 (24.40)         | <0.001 |
| Incident death in 100 person years (95% CI)                | 5.08<br>(5.05 – 5.11)            | 4.40<br>(4.35 – 4.45) <sup>d</sup> | 5.56<br>(5.51 – 5.61) | 5.45<br>(5.41 – 5.49) | <0.001 |

- Includes patients exposed to PPI at T0 (n=275977) and during follow-up (n=33136). Variables were measured at time of PPI exposure.
- P value for difference between exposed to H2 at T0 and exposed to PPI at T0
- From T0 to first occurrence of death or September 30, 2013
- Outcome measured from T0 to first occurrence of exposure PPI, death or September 30, 2007
- Days of having PPI or H2 blockers

Abbreviations: CI, Confidence interval; eGFR, estimated Glomerular Filtration Rate; GERD, Gastroesophageal Reflux Disease; HIV, human immunodeficiency virus; IQR, interquartile range; NA, Not Applicable; SD, Standard deviation

**Supplemental table 2:** Duration of exposure to PPI and risk of death among new users of PPI in the 2001 cohort (n=101,109)

| Duration (Days)                                                                                                                                                                                                                                                                                                                                                                                                                                                                                                                                                                            | ≤ 30             | 31 - 90              | 91 - 180             | 181 - 360            | 361 - 720            |
|--------------------------------------------------------------------------------------------------------------------------------------------------------------------------------------------------------------------------------------------------------------------------------------------------------------------------------------------------------------------------------------------------------------------------------------------------------------------------------------------------------------------------------------------------------------------------------------------|------------------|----------------------|----------------------|----------------------|----------------------|
| N (%)                                                                                                                                                                                                                                                                                                                                                                                                                                                                                                                                                                                      | 15204<br>(15.04) | 20409<br>(20.19)     | 17137<br>(16.95)     | 21586<br>(21.35)     | 26773<br>(26.48)     |
| Hazard Ratio (95%CI)                                                                                                                                                                                                                                                                                                                                                                                                                                                                                                                                                                       | 1                | 1.04<br>(1.01, 1.07) | 1.11<br>(1.08, 1.15) | 1.18<br>(1.15, 1.22) | 1.28<br>(1.24, 1.31) |
| <p>a. Within people exposure to PPI between 1 to 720 days</p> <p>b. Model controls for eGFR, age, race, gender, number of serum creatinine measurements, number of hospitalizations, diabetes mellitus, hypertension, cardiovascular disease, peripheral artery disease, cerebrovascular disease, chronic lung disease, hepatitis C, HIV, dementia, cancer, GERD, upper GI tract bleeding, ulcer disease, H. Pylori infection, Barrett's esophagus, achalasia, stricture and esophageal adenocarcinoma</p> <p>c. Time zero defined as date when the patients last PPI prescription end</p> |                  |                      |                      |                      |                      |

## Supplemental Methods:

### Time Dependent Propensity Score Matching

1. Using the primary cohort (N=349, 312), all covariates except for age, race and gender were treated as time-dependent variables from T0 till date of PPI use or end of follow up, whichever occurred first. Specifically, time-dependent eGFR indicated the eGFR at day t (where the value was equal to the outpatient eGFR measurement most close and prior to time t); time-dependent number of outpatient serum creatinine measurements and number of hospitalizations indicated the cumulative value from October 01, 1998 till day t; time-dependent disease status including diabetes mellitus, hypertension, cardiovascular disease, peripheral artery disease, cerebrovascular disease, chronic lung disease, cancer, hepatitis C, HIV, dementia and diseases associated with acid suppression therapy use such as gastroesophageal reflux disease (GERD), upper gastrointestinal (GI) tract bleeding, ulcer disease, H. Pylori infection, Barrett's esophagus, achalasia, stricture and esophageal adenocarcinoma indicated if participants were diagnosed with the disease between October 01, 1998 and day t.

2. Time-dependent Cox regression was applied, where time until receipt of first PPI prescription was the outcome (participants receiving PPI prescription at T0 were considered to have the event with survival time equal to 0 days). Time-dependent variables from step 1 and age, race and gender were used as predictors in the model in order to obtain parameter estimates for the predictors.

3. Every participant's hazard component at day t was computed based on the parameter estimates from step 2 and their covariate values at day t.

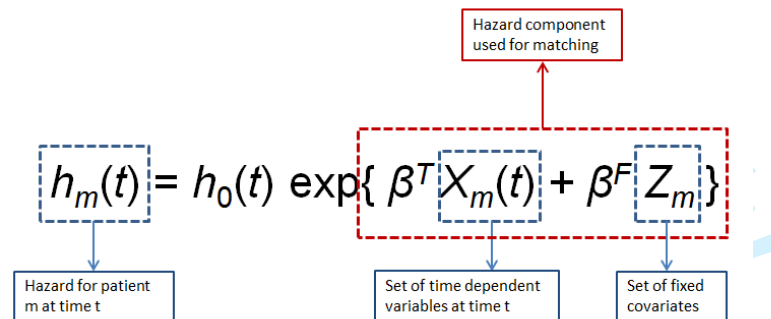

The hazard component was used as the time-dependent propensity score.

4. Beginning from T0 (day 0), a 1:1 sequential greedy matching without replacement was conducted. People who received PPI prescription at day t (case group at day t) were matched with people who had not yet received PPI prescription at day t (control group at day t) based on their propensity score at day

t. The order of both case and control groups was randomized before matching. A matched pair was considered successfully matched only if the propensity score difference was less than 0.2 times the standard deviation of the hazard component at time t. If no successful match was made the case in the pair was withdrawn from the further matching while the control was left in the data pool. Matching was ended when 1/ all participants in control or case group were matched or 2/ day t equaled day 1827.

5. After the matching, conditional Cox regressions stratified by matched pairs were conducted to examine the association between PPI and death.

**High-dimensional propensity score:**

1. Using the primary cohort (N=349,312), participants data from 1 year before T0 till T0 were collected in 5 dimensions consisting off: the first 3 digits of outpatient diagnoses ICD9 codes, the outpatient procedures CPT codes, the first 3 digits of inpatient diagnoses ICD9 codes, the first 3 digits of inpatient procedures ICD9 codes, and the outpatient drug names without dose.

2. Within each of the 5 dimensions, the top 300 most frequent items were selected, which yielded  $300*5=1500$  potential items.

3. For each participant, we determined if each of the 1500 potential items 1\ ever occurred, 2\ if the number of occurrences for the participant was higher than the number of occurrences in 50% of the participants and 3\ if the number of occurrences for the participant was higher than the number of occurrences in 75% of the participants. This step results in  $1500*3=4500$  binary potential variables. If the 50% or 75% percentile of the number of item occurrences was less than 1, then the variable were coded as 0 for all participants. If the 50% and 75% percentile of the number of item occurrences had the same value, then the 75% variable was coded as 0 for all participants.

4. Bias was calculated using formula based on apparent relative risk for each of the 4500 variables:

$$\text{Bias}=(P\_C1 (RR\_CD -1)+1)/(P\_C0 (RR\_CD -1)+1) ,\text{if } RR\_CD \geq 1$$

$$\text{Bias}=(P\_C1 (1/RR\_CD -1)+1)/(P\_C0 (1/RR\_CD -1)+1) ,\text{if } RR\_CD < 1$$

Where P\_C1 indicates the prevalence of the variable in the PPI group, P\_C0 indicates the prevalence of the variable in the control group, and RR\_CD indicate relative risk of death associated with the variable.

5. The top 500 variables with the largest  $|\log(\text{bias})|$  value were selected as binary empirical covariates for inclusion in the propensity score modeling.

1  
2  
3 6. The 500 variables and age, gender, race, and eGFR were used to obtain propensity scores from logistic  
4 regression where the outcome was receipt of PPI or not at T0. Propensity scores were then categorized  
5 into deciles.  
6  
7

8  
9  
10 7. Multivariate Cox regression with an indicator for propensity score decile was used to evaluate the  
11 association between PPI and death. Patients in the control group who received PPI later were censored  
12 at the time they received PPI.  
13

#### 14 **Two-stage residual inclusion estimation (Instrumental Variable):**

15  
16  
17 1. Based on the primary cohort (N=349,312), for each participant, data on prescriptions by the physician  
18 who prescribed the participant the acid suppression therapy at T0 was collected from 6 months before  
19 the participant's T0 till T0.  
20  
21

22  
23  
24 2. For each participant, the percentage of PPIs prescribed to new acid suppression therapy users by their  
25 prescribing physician, excluding the prescription of the participant, in the 6 months prior to and  
26 including T0 was computed and used as an instrumental variable. Participants whose prescribing  
27 physician did not prescribe any other acid suppression therapy to new users in the 6 months prior to and  
28 including T0 were excluded from the analysis.  
29  
30  
31

32  
33  
34 3. In order to predict the participants' possibility of receiving PPI, instrumental variable and co-variables  
35 were used in a logistic regression model where the outcome was acid suppression therapy prescription  
36 at T0.  
37  
38  
39

40  
41  
42 4. Residual terms were computed as the difference between participants' real probability ( 1 if PPI, 0 if  
43 H2 blocker) and predicted probability.  
44  
45  
46

47  
48 5. Multivariate Cox regression, which included the residual term and co-variables, were conducted to  
49 evaluate the relationship between PPI and death. Patients in the control group who received PPI later  
50 were censored at the time they received PPI.  
51  
52  
53  
54  
55  
56  
57  
58  
59  
60

## STROBE Statement—checklist of items that should be included in reports of observational studies

|                          | Item No | Recommendation                                                                                                                                                                                                                                                                                                                                                                                                                                                         | Reported Page                                               |
|--------------------------|---------|------------------------------------------------------------------------------------------------------------------------------------------------------------------------------------------------------------------------------------------------------------------------------------------------------------------------------------------------------------------------------------------------------------------------------------------------------------------------|-------------------------------------------------------------|
| Title and abstract       | 1       | (a) Indicate the study's design with a commonly used term in the title or the abstract                                                                                                                                                                                                                                                                                                                                                                                 | 1                                                           |
|                          |         | (b) Provide in the abstract an informative and balanced summary of what was done and what was found                                                                                                                                                                                                                                                                                                                                                                    | 2                                                           |
| <b>Introduction</b>      |         |                                                                                                                                                                                                                                                                                                                                                                                                                                                                        |                                                             |
| Background/rationale     | 2       | Explain the scientific background and rationale for the investigation being reported                                                                                                                                                                                                                                                                                                                                                                                   | 3                                                           |
| Objectives               | 3       | State specific objectives, including any prespecified hypotheses                                                                                                                                                                                                                                                                                                                                                                                                       | 3-4                                                         |
| <b>Methods</b>           |         |                                                                                                                                                                                                                                                                                                                                                                                                                                                                        |                                                             |
| Study design             | 4       | Present key elements of study design early in the paper                                                                                                                                                                                                                                                                                                                                                                                                                | 4                                                           |
| Setting                  | 5       | Describe the setting, locations, and relevant dates, including periods of recruitment, exposure, follow-up, and data collection                                                                                                                                                                                                                                                                                                                                        | 4                                                           |
| Participants             | 6       | (a) <i>Cohort study</i> —Give the eligibility criteria, and the sources and methods of selection of participants. Describe methods of follow-up<br><i>Case-control study</i> —Give the eligibility criteria, and the sources and methods of case ascertainment and control selection. Give the rationale for the choice of cases and controls<br><i>Cross-sectional study</i> —Give the eligibility criteria, and the sources and methods of selection of participants | 4-5                                                         |
|                          |         | (b) <i>Cohort study</i> —For matched studies, give matching criteria and number of exposed and unexposed<br><i>Case-control study</i> —For matched studies, give matching criteria and the number of controls per case                                                                                                                                                                                                                                                 | Additional matched cohort described in Supplemental methods |
| Variables                | 7       | Clearly define all outcomes, exposures, predictors, potential confounders, and effect modifiers. Give diagnostic criteria, if applicable                                                                                                                                                                                                                                                                                                                               | 5-6                                                         |
| Data sources/measurement | 8*      | For each variable of interest, give sources of data and details of methods of assessment (measurement). Describe comparability of assessment methods if there is more than one group                                                                                                                                                                                                                                                                                   | 5-6                                                         |
| Bias                     | 9       | Describe any efforts to address potential sources of bias                                                                                                                                                                                                                                                                                                                                                                                                              | 7                                                           |
| Study size               | 10      | Explain how the study size was arrived at                                                                                                                                                                                                                                                                                                                                                                                                                              | 4                                                           |
| Quantitative variables   | 11      | Explain how quantitative variables were handled in the analyses. If applicable, describe which groupings were chosen and why                                                                                                                                                                                                                                                                                                                                           | 6                                                           |
| Statistical methods      | 12      | (a) Describe all statistical methods, including those used to control for confounding                                                                                                                                                                                                                                                                                                                                                                                  | 6-7 and Supplemental methods                                |
|                          |         | (b) Describe any methods used to examine subgroups and interactions                                                                                                                                                                                                                                                                                                                                                                                                    | 6                                                           |
|                          |         | (c) Explain how missing data were addressed                                                                                                                                                                                                                                                                                                                                                                                                                            | 7                                                           |
|                          |         | (d) <i>Cohort study</i> —If applicable, explain how loss to follow-up was addressed<br><i>Case-control study</i> —If applicable, explain how matching of cases and controls was addressed                                                                                                                                                                                                                                                                              | Due to the feature of VA data on death                      |



|  |  |                                                                                                              |                                                                                                                   |
|--|--|--------------------------------------------------------------------------------------------------------------|-------------------------------------------------------------------------------------------------------------------|
|  |  | <i>Cross-sectional study</i> —If applicable, describe analytical methods taking account of sampling strategy | information, no loss of follow-up would occur. All death data is captured by the Veterans Benefit Administration. |
|  |  | (e) Describe any sensitivity analyses                                                                        | 7-8                                                                                                               |

| Results                  |     |                                                                                                                                                                                                              | Reported Page            |
|--------------------------|-----|--------------------------------------------------------------------------------------------------------------------------------------------------------------------------------------------------------------|--------------------------|
| Participants             | 13* | (a) Report numbers of individuals at each stage of study—eg numbers potentially eligible, examined for eligibility, confirmed eligible, included in the study, completing follow-up, and analysed            | 4-5                      |
|                          |     | (b) Give reasons for non-participation at each stage                                                                                                                                                         | N/A                      |
|                          |     | (c) Consider use of a flow diagram                                                                                                                                                                           | N/A                      |
| Descriptive data         | 14* | (a) Give characteristics of study participants (eg demographic, clinical, social) and information on exposures and potential confounders                                                                     | 19-20<br>Table 1         |
|                          |     | (b) Indicate number of participants with missing data for each variable of interest                                                                                                                          | see page 7<br>for reason |
|                          |     | (c) <i>Cohort study</i> —Summarise follow-up time (eg, average and total amount)                                                                                                                             | 20 Table 1               |
| Outcome data             | 15* | <i>Cohort study</i> —Report numbers of outcome events or summary measures over time                                                                                                                          | 19 Table 1               |
|                          |     | <i>Case-control study</i> —Report numbers in each exposure category, or summary measures of exposure                                                                                                         | N/A                      |
|                          |     | <i>Cross-sectional study</i> —Report numbers of outcome events or summary measures                                                                                                                           | N/A                      |
| Main results             | 16  | (a) Give unadjusted estimates and, if applicable, confounder-adjusted estimates and their precision (eg, 95% confidence interval). Make clear which confounders were adjusted for and why they were included | 21-22<br>Table 2         |
|                          |     | (b) Report category boundaries when continuous variables were categorized                                                                                                                                    | N/A                      |
|                          |     | (c) If relevant, consider translating estimates of relative risk into absolute risk for a meaningful time period                                                                                             | N/A                      |
| Other analyses           | 17  | Report other analyses done—eg analyses of subgroups and interactions, and sensitivity analyses                                                                                                               | 9-10                     |
| <b>Discussion</b>        |     |                                                                                                                                                                                                              |                          |
| Key results              | 18  | Summarise key results with reference to study objectives                                                                                                                                                     | 12                       |
| Limitations              | 19  | Discuss limitations of the study, taking into account sources of potential bias or imprecision. Discuss both direction and magnitude of any potential bias                                                   | 13                       |
| Interpretation           | 20  | Give a cautious overall interpretation of results considering objectives, limitations, multiplicity of analyses, results from similar studies, and other relevant evidence                                   | 12-13                    |
| Generalisability         | 21  | Discuss the generalisability (external validity) of the study results                                                                                                                                        | 12                       |
| <b>Other information</b> |     |                                                                                                                                                                                                              |                          |
| Funding                  | 22  | Give the source of funding and the role of the funders for the present study and, if                                                                                                                         | 15                       |

|  |  |                                                                          |  |
|--|--|--------------------------------------------------------------------------|--|
|  |  | applicable, for the original study on which the present article is based |  |
|--|--|--------------------------------------------------------------------------|--|

\*Give information separately for cases and controls in case-control studies and, if applicable, for exposed and unexposed groups in cohort and cross-sectional studies.

**Note:** An Explanation and Elaboration article discusses each checklist item and gives methodological background and published examples of transparent reporting. The STROBE checklist is best used in conjunction with this article (freely available on the Web sites of PLoS Medicine at <http://www.plosmedicine.org/>, Annals of Internal Medicine at <http://www.annals.org/>, and Epidemiology at <http://www.epidem.com/>). Information on the STROBE Initiative is available at [www.strobe-statement.org](http://www.strobe-statement.org).

For peer review only
